# Supplementary material
Source: PubMed Central journal article supplement (PMC4963294)
Supplement: NIHMS797292-supplement-Supplemental_Material.pdf [file NIHMS797292-supplement-Supplemental_Material.pdf]

## **Supplemental Material**

## **Supplemental Methods and Figures**

## SOMAscan™ Proteomics Assay

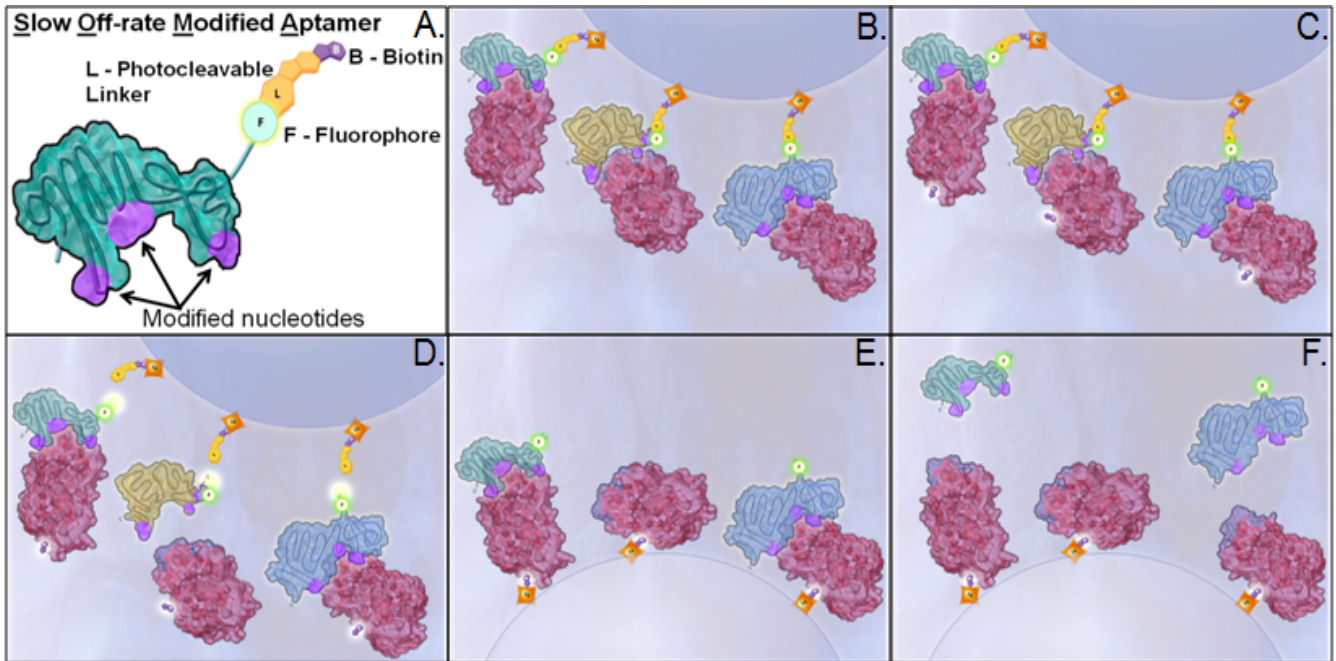

### Supplemental Figure 1. SOMAscan™ Overview

A SOMAmer reagent is a single-stranded DNA-based aptamer that is chemically modified to enhance binding to conformational protein epitopes with high affinity and specificity. Its fluorophore tag allows for detection by standard oligo-array readers. (**Supplemental Figure 1A** demonstrates details of SOMAmer® structure). The assay measures proteins directly from plasma using a multi-step capture, release, and re-capture enrichment process. First, plasma proteins (purple) bind to the bead-immobilized SOMAmers® (**Supplemental Figure 1B**). SOMAmer®-bound proteins are biotinylated (**Supplemental Figure 1C**). SOMAmer®-protein complexes are then released by a photocleavage process and non-specific pairs are disrupted (**Supplemental Figure 1D**). Next, the biotinylated proteins are bound to a second streptavidin bead (**Supplemental Figure 1E**). Following a washing step, SOMAmers® are released from the protein targets and collected (**Supplemental Figure 1F**). The fluorophore-tagged modified

nucleotides are quantitated using an oligo-array plate reader (Agilent Technologies).

### **SOMAscan™ Standardization**

To correct for systematic effects on data introduced during the hybridization process, 12 hybridization control sequences were introduced into each clinical sample. There was a predetermined global reference RFU for each hybridization control based on independently run assays. A ratio is determined by this global RFU for each control/measured RFU of each hybridization control. The median of the ratios determines the sample based hybridization scale factor. Each sample was multiplied by its own scale factor.

Median normalization was performed to remove sample or assay biases that may be due to differences between samples in overall protein concentration, pipetting variation, variation in reagent concentrations, assay timing, and any other source of systematic variability within a single plate run. Each sample was diluted either to 40%, 1% or 0.05%. A scale factor was derived for each dilution set and all the SOMAmers in each dilution set are scaled together. Median RFU for a SOMAmer within the sample group was the reference SOMAmer RFU. A ratio was determined by the reference SOMAmer RFU/measured RFU of the SOMAmer in the sample. Within each dilution set, the median SOMAmer ratio was the scale factor for all the SOMAmers in that dilution in that sample. The acceptance criteria for these values are 0.4 to 2.5, based on historic trends in these values.

The global reference RFU for each SOMAmer was defined as the median signal measured on a set of samples spanning a number of independent assay runs. There were 5 calibrator samples which comprise of human pooled plasma on each plate. A local median reference value was derived for each SOMAmer by computing the median RFU for that SOMAmer from the 5 calibrator samples within a single plate. A scale factor was determined by the ratio of the global reference calibrator for the SOMAmer/ local median reference value of the SOMAmer. Each SOMAmer on each plate has a unique scale factor. The acceptance criterion for calibrator

scale factors is that 95% of SOMAmers must have a calibration scale factor within 60.4 of the median. These calibrator samples were also used to calculate intra-assay CV.

Additionally, the plasma from one individual was run as 2 QC samples on each plate. The QC samples were normalized as above. Hybridization normalized, median normalized and calibrated QC samples were used to calculate inter-assay CV for each SOMAmer because calibration by definition will minimize the plate-to-plate variance of the calibrator samples.

## **Reproducibility**

### ***Coefficient of variation studies***

Assay plates contained 24 clinical samples, 5 pooled plasma calibrators, 2 quality control samples and 1 negative control buffer sample. We assayed 5 replicate pooled plasma samples (calibrators) across 43 plates. For each of the 43 plates, median intra-assay CV  $\leq$  8.2%. We assayed 2 replicate plasma samples across the 43 plates to determine median inter-assay CV of 7.8%.

### ***Intraclass correlation (ICC) studies of blinded duplicate samples.***

In addition to performing CV studies using pooled plasma samples, we also evaluated reproducibility by analyzing blinded duplicate samples from 94 FHS Offspring participants (N=188 total samples) collected between 1991-1995. ICCs for 1129 proteins assayed demonstrated median ICC  $>0.95$ . The entire distribution is plotted in **Supplemental Figure 2**. Taken together, the QC studies using both the pooled plasma samples and the blinded split samples from FHS confirm the reproducibility of the platform established in our laboratory.

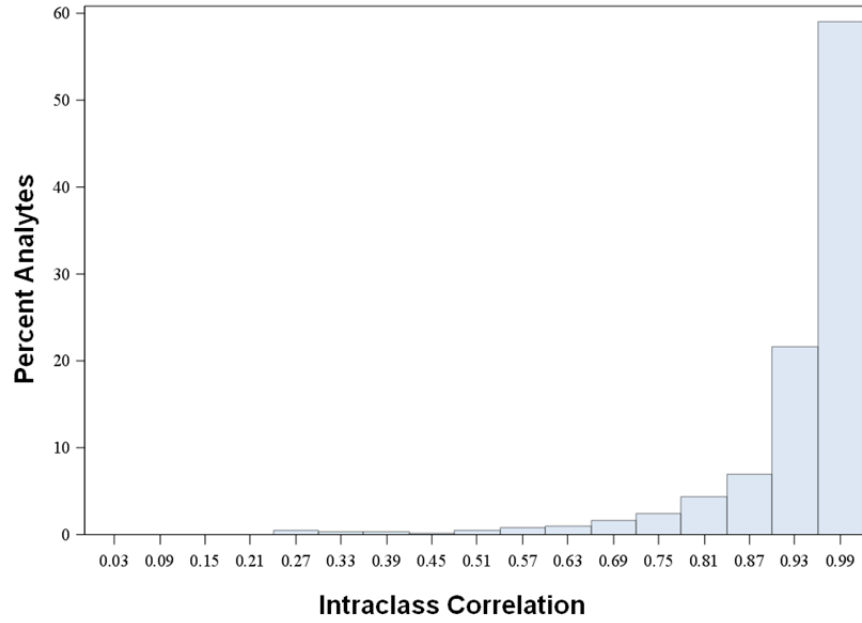

**Supplemental Figure 2. Distribution of intraclass correlation for duplicate samples**

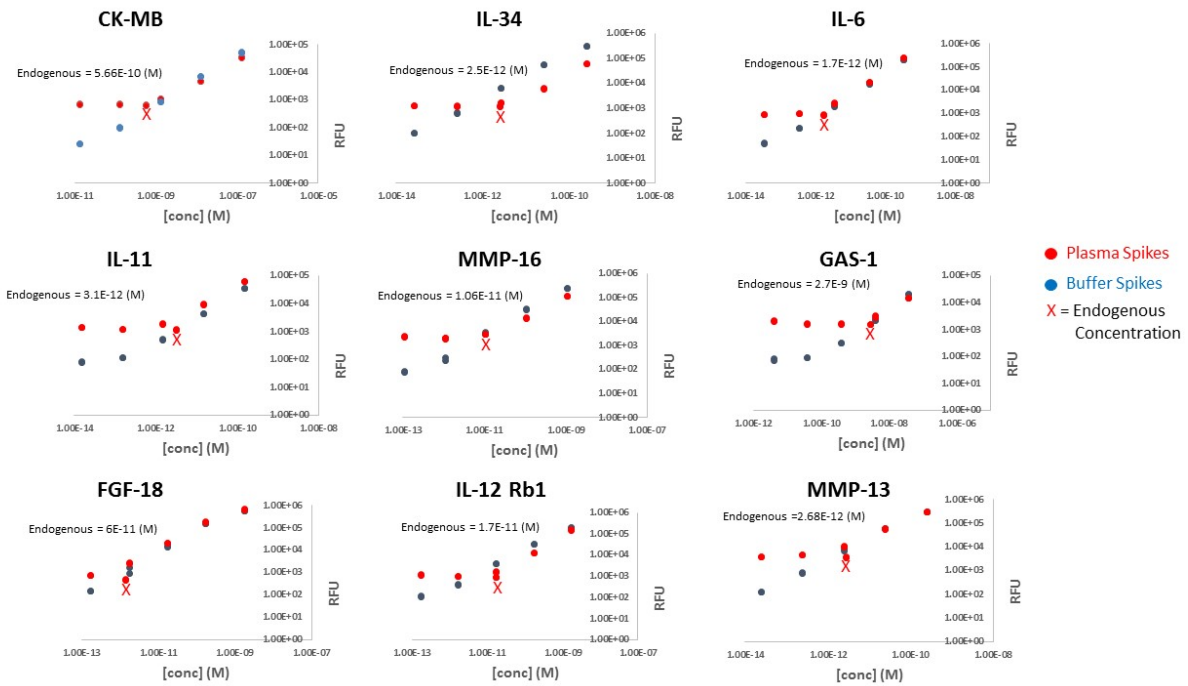

**Supplemental Figure 3. SOMAscan™ calibration curves for spiked in protein standards**

Standards corresponding to proteins associated with PMI were spiked into human pooled plasma or assay buffer (as indicated) to achieve a range of concentrations across 5 orders of magnitude. Samples were run on the aptamer platform. Calibration curves were generated from the concentration versus RFU data. Linear regression analysis was performed to calculate endogenous human pooled plasma protein concentrations.

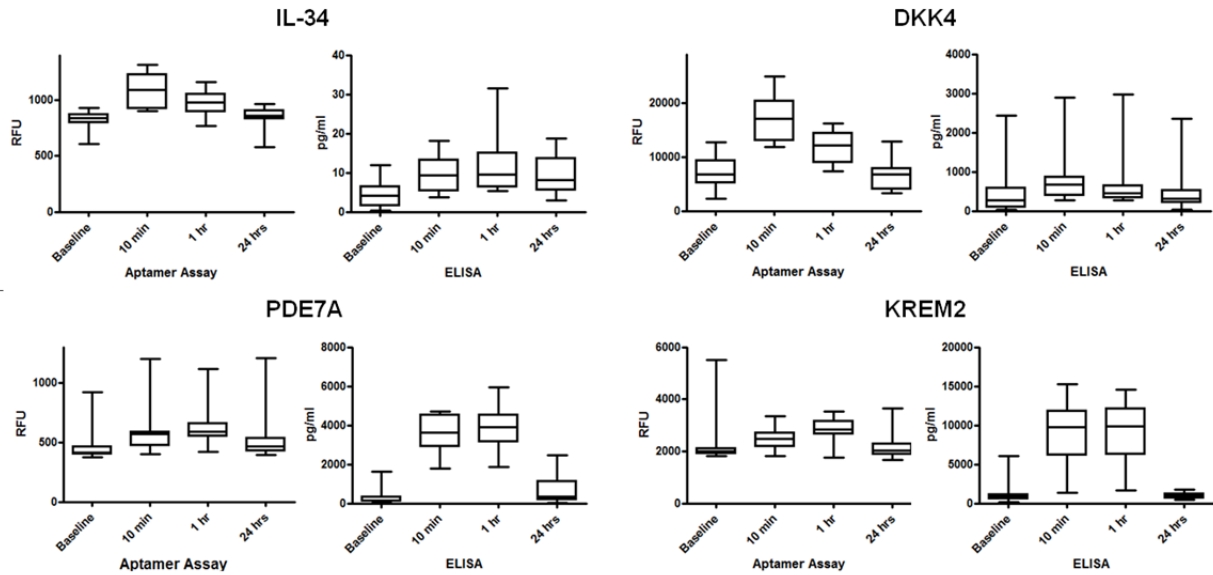

#### Supplemental Figure 4. Immunoassay validation for selected PMI findings

For each protein, aptamer-based data are presented in the left of each panel ( $P < 2.30E-4$  for all proteins by ANOVA) and corresponding immunoassay data in the right of each panel (IL-34:  $P = 8.61E-4$ ; PDE7A:  $P = 3.80E-08$ ; DKK-4:  $P = 8.48E-03$ ; KREM2:  $P = 1.0E-09$  by one-way ANOVA). Data are from  $n \geq 10$  individuals for each biomarker. Edges of boxes denote 25<sup>th</sup> and 75<sup>th</sup> percentiles, lines denote median, whiskers denote minimum and maximum values. Due to sample availability, corresponding aptamer and immunoassay were not performed on the identical individuals.



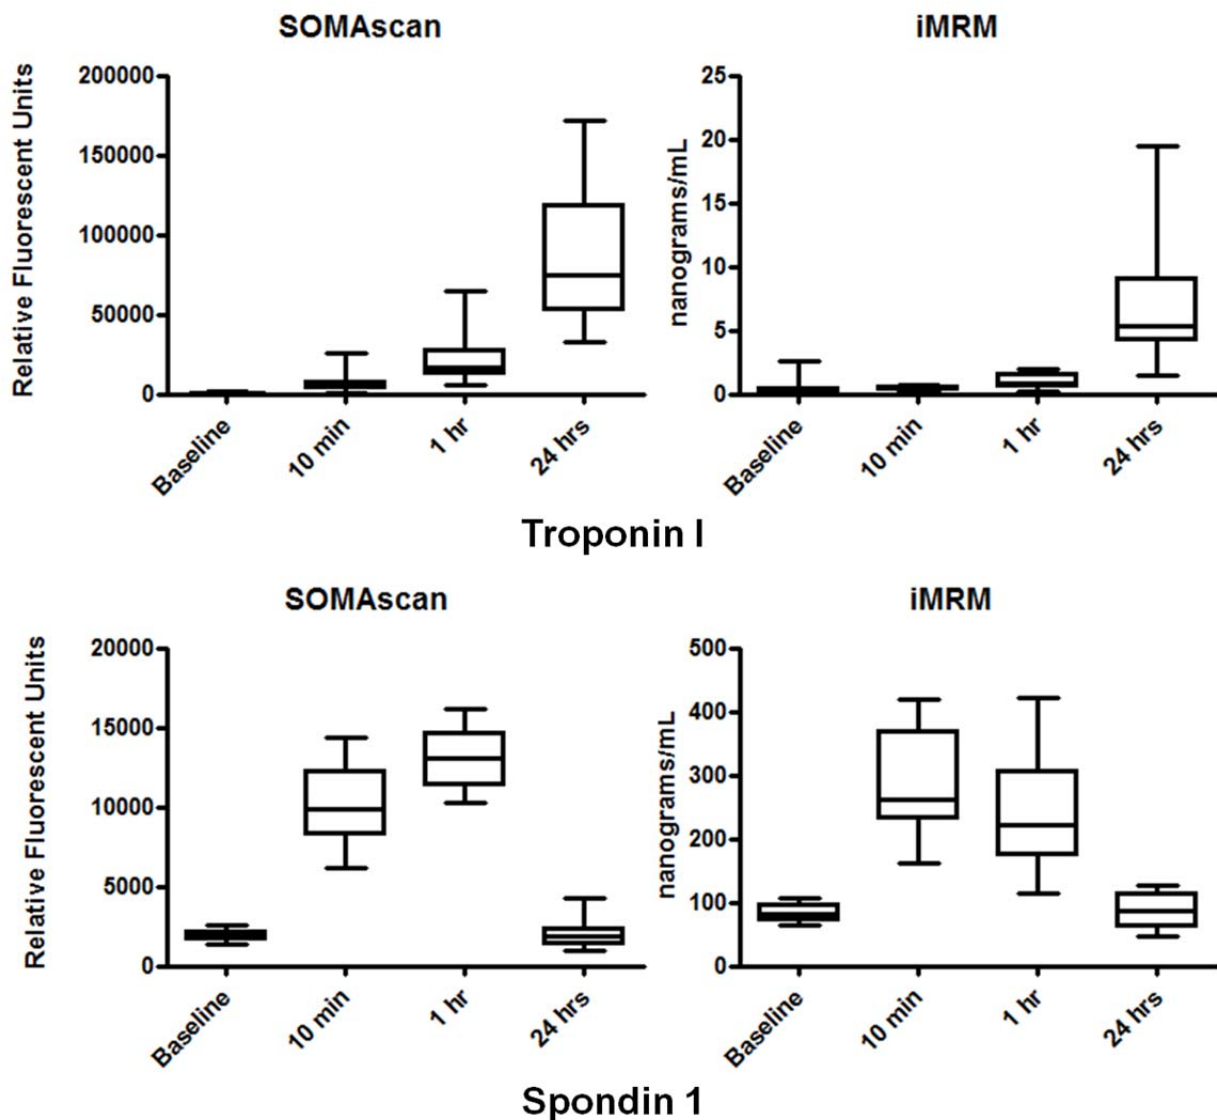

**Supplemental Figure 5. Comparison of protein measurements by SOMAscan aptamer-based assay versus immunoaffinity MRM in PMI patients**

SOMAscan data represents protein levels in validation cohort (n=15) and iMRM data represents protein levels in an independent PMI cohort (n=12 for Spondin 1 and n=11 for Troponin I).

Edges of boxes denote 25<sup>th</sup> and 75<sup>th</sup> percentiles, lines denote median, whiskers denote minimum and maximum values.

## **Supplemental Methods for Aptamer Affinity Evaluation using targeted LC-MRM-MS and untargeted LC-MS/MS**

### ***Aptamer affinity enrichment***

Two picomoles of protein for each of the 29 proteins were added to 40 uL of patient plasma (1 hour timepoint) in duplicate. Two additional equivalent volumes of plasma were prepared without proteins added. Samples were brought to 100 uL total by the addition of 60 uL of HEPES buffer (40 mM HEPES, 102 mM NaCl, 1 mM EDTA, 5 mM MgCl<sub>2</sub>, 5 mM KCl, 0.05% Tween-20, pH 7.5). Ten picomoles each of 29 SOMAmers®, aptamers containing photocleavable linkers and biotin (SOMALogic, Boulder, CO), generated specifically against these 29 proteins were combined for each affinity enrichment, heated to 95C for 10min, then cooled to room temperature prior to use. For each enrichment, 100 uL of streptavidin (SA) C1 magnetic beads (Dyna, Invitrogen, Thermo) were washed 2 times with 500 uL HEPES buffer. After a brief vortex mix, a magnet was used to pull the beads to the side of the tube and the supernatant was removed. Beads were resuspended in 100 uL HEPES, added to the SOMAmer mixture (290 pmol total/capture) and tumble mixed 20 min at room temperature. After incubation, beads were washed 2 times with 500uL CAPS buffer (50 mM CAPS, 1 mM EDTA, 0.05% Tween-20, pH 11.0). Beads were resuspended in an equivalent starting volume of HEPES buffer (100 uL/capture) and added to one replicate of plasma containing added proteins and one replicate of plasma without additional proteins. As controls, 100 uL of SA beads were washed with HEPES buffer and added to one of each type of plasma sample (with and without added proteins). Samples were tumble mixed overnight at room temperature. After mixing, beads were washed twice with HEPES buffer without Tween-20 and bound material was eluted with 2 volumes of 50 uL of 20 mM NaOH. Eluates were pooled and dried under vacuum prior to digestion.

### ***Preparation of protein response curves***

Plasma was obtained from a pool of healthy donors (BioreclamationIVT, Westbury, NY). Fifteen picomoles for each of the 29 proteins were added to 300 uL of 40% plasma (120 uL into 180 uL of HEPES buffer (40 mM HEPES, 102 mM NaCl, 1 mM EDTA, 5 mM MgCl<sub>2</sub>, 5 mM KCl, 0.05% Tween-20, pH 7.5) and serially diluted in 4-fold increments over 8 concentrations as previously described.<sup>1</sup> A blank plasma sample without added proteins was also prepared. One hundred uL of each curve sample was affinity enriched using a 29-plex of aptamers as described in the section “Aptamer affinity enrichment” in triplicate. After digestion and prior to desalt, 50 fmol of 19 stable isotope standard peptides were added (see **Supplemental Table 21** for sequences and masses).

### ***Trypsin digestion of aptamer-enriched samples***

Samples of aptamer enriched plasma were resuspended in 40 uL of 7 M Urea, 2 M thiourea, 5 uL 1 M Tris pH 8.0, and 4 uL 0.5 M tris(2-chloroethyl) phosphate and incubated at 37 °C 850 RPM for 30 min. After reduction and denaturation, samples were cooled to room temperature and 10 uL of 0.5 M iodoacetamide were added. After mixing briefly, the samples were incubated in the dark at room temperature for 30 min. After alkylation, 250 uL of 0.2 M Tris pH 8.1 and 2 ug of porcine trypsin (Promega) were added and samples were incubated at 37 °C 850 RPM overnight. After digestion, 15 uL trifluoroacetic acid (TFA) were added to quench the reaction and samples were desalted using StageTips<sup>2</sup> by centrifugation (Eppendorf) at 2000 RCF for 2 min after each solvent was added. StageTips were washed and equilibrated with 50 uL of 90% acetonitrile/0.1% TFA and 0.1% TFA prior to use. Samples were added to StageTips in 50 uL increments, centrifuging after each load until the entire digestion volume was loaded. After sample loading, StageTips were washed with 75 uL 0.1% TFA and then eluted with 75 uL

40 % acetonitrile/0.1%TFA. Eluates were dried under vacuum and stored at -80 °C until analysis.

### ***Nano-LC-MRM-MS analysis of digested aptamer enriched samples***

Samples were resuspended in 10 uL 3% acetonitrile/5% acetic acid, mixed and centrifuged briefly and transferred to HPLC vials and analyzed on a Quantiva triple quadrupole mass spectrometer equipped with a Proxeon Easy-nLC 1000 and Nanospray Flex source (Thermo, San Jose, CA). Samples were injected (20% of sample) on a 75 um ID PicoFrit column (New Objective, Woburn, MA) manually packed to 15 cm with Reprosil-Pur C18 AQ 1.9 um media (Dr. Maisch, Entringen, Germany) and heated to 50 °C. MS source conditions were set as follows: spray voltage 2000, ion transfer tube temperature 300, sweep gas 0, CID gas 1.5 and source fragmentation voltage 10.

Two to nine peptides were monitored per protein, scanning for 3 to 5 transitions per peptide with 0.2 Q1 resolution and 0.7 Q3 resolution scheduled within 8 minute windows using a cycle time of 1.5 s. Where possible, two charge states and transitions were monitored to increase confidence in peptide detection in absence of heavy labeled standards. Collision energies were set for each peptide based on its precursor m/z using collision energy equation calibrated for our Quantiva QQQ-MS (see **Supplemental Table 21** for list of transitions, scheduled retention times and collision energies for all peptides monitored by MRM-MS). Mobile phases consisted of 3% acetonitrile/0.1% formic acid as solvent A, 90% acetonitrile/0.1% formic acid as solvent B. Flow rate was set to 200 nL/min throughout the gradient, 0% - 6% B in 6 min, 6% - 33% B in 59 min, 33% - 90%B in 4 min with a hold at 90%B for 10 min.

Extracted Ion chromatograms (XIC) of all transition ions were integrated using a Skyline document (Skyline daily version 3.5.0.9319 <https://brendanx-uw1.gs.washington.edu/labkey/project/home/software/Skyline/begin.view>).<sup>3</sup> Peptides with the

correct sequences were identified within Skyline and by manual inspection as those having nearly identical fragment-ion (transition) intensities as the authentic peptides derived by digestion of the protein standards alone or the heavy peptides when present. Integrated peaks were further processed using QuaSAR,<sup>4</sup> (available as an external tool in Skyline or at: <http://genepattern.broadinstitute.org/>) to perform regression analysis<sup>5</sup> on the curves and calculate the limits of detection (LOD) and quantification (LOQ) of each peptide for each protein. See **Supplemental Table 19 and 20** for a summary of aptamer performance

### ***LC-MS/MS analysis of digested aptamer enriched samples***

Samples were resuspended in 10  $\mu$ L 3% acetonitrile/5% acetic acid, mixed and centrifuged briefly and transferred to HPLC vials and analyzed on a QExactive mass spectrometer (Thermo, San Jose, CA) equipped with a Proxeon Easy-nLC 1000 and a custom built nanospray source (James A. Hill Instrument Services, Arlington, MA). Samples were injected (20% of sample) on a 75  $\mu$ m ID PicoFrit column (New Objective, Woburn, MA) manually packed to 20 cm with Reprosil-Pur C18 AQ 1.9  $\mu$ m media (Dr. Maisch, Entringen, Germany) and heated to 50 °C. MS source conditions were set as follows: spray voltage 2000, capillary temperature 250, S-lens RF level 50. A single Orbitrap MS scan from 300 to 1800 m/z at a resolution of 70,000 with AGC set at 3e6 was followed by up to 12 MS/MS scans at a resolution of 17,500 with AGC set at 5e4. MS/MS spectra were collected with normalized collision energy of 25 and isolation width of 2.5 amu. Dynamic exclusion was set to 20s and peptide match was set to preferred. Mobile phases consisted of 3% acetonitrile/0.1% formic acid as solvent A, 90% acetonitrile/0.1% formic acid as solvent B. Flow rate was set to 200 nL/min throughout the gradient, 2% - 6% B in 1 min, 6% - 30% B in 84 min, 30% - 60%B, 60%-90%B in 1 min with a hold at 90%B for 5 min.

MS data were analyzed using Spectrum Mill MS Proteomics Workbench software Rev B.04.01.142 (Agilent Technologies, Santa Clara, CA). Similar MS/MS spectra acquired on the

same precursor m/z within +/- 60 sec were merged. MS/MS spectra were excluded from searching if they failed the quality filter by not having a sequence tag length > 0 (i.e., minimum of two masses separated by the in-chain mass of an amino acid) or did not have a precursor MH+ in the range of 600-6000. All extracted spectra were searched against a UniProt database containing human reference proteome sequences downloaded from the UniProt web site on October 17, 2014 with redundant sequences removed and a set of common laboratory contaminant proteins (150 sequences) added. Search parameters included: ESI-QEXACTIVE-HCD-v2 scoring, parent and fragment mass tolerance of 20 ppm, 40% minimum matched peak intensity and 'trypsin allow P' enzyme specificity up to 4 missed cleavages. Fixed modification was carbamidomethylation at cysteine and variable modifications were acetylation of protein N-termini, oxidized methionine, deamidation of asparagine and pyro-glutamic acid. Database matches were autovalidated at the peptide and protein level in a two-step process with identification FDR estimated by target-decoy-based searches using reversed sequences. Protein-peptide comparison report comprised of all validated peptides was exported to generate a summary of identified peptides for each sample ranked from highest scoring protein to lowest. For the subset of peptides unique to the added proteins standards, peptides with the highest number of spectra were preferentially selected for MRM method generation.

### ***Supplemental references for aptamer-MS studies***

1. Kuhn E, Whiteaker JR, Mani DR, Jackson AM, Zhao L, Pope ME, Smith D, Rivera KD, Anderson NL, Skates SJ, Pearson TW, Paulovich AG, Carr SA. Interlaboratory evaluation of automated, multiplexed peptide immunoaffinity enrichment coupled to multiple reaction monitoring mass spectrometry for quantifying proteins in plasma. *Mol Cell Proteomics*. 2012;11:M111.013854.

2. Rappsilber J, Ishihama Y, Mann M. Stop and go extraction tips for matrix-assisted laser desorption/ionization, nanoelectrospray, and LC/MS sample pretreatment in proteomics. *Anal Chem.* 2003;75:663-70.
3. MacLean B, Tomazela DM, Shulman N, Chambers M, Finney GL, Frewen B, Kern R, Tabb, DL, Liebler DC, MacCoss MJ. Skyline: an open source document editor for creating and analyzing targeted proteomics experiments. *Bioinformatics.* 2010;26:966-8.
4. Broudy D, Killeen T, Choi M, Shulman N, Mani DR, Abbatiello SE, Mani D, Ahmad R, Sahu AK, Schilling B, Tamura K, Boss Y, Sharma V, Gibson BW, Carr SA, Vitek O, MacCoss MJ, MacLean B. *Bioinforma. Oxf. Engl.* 2014;30:2521–2523.
5. Mani DR, Abbatiello SE, Carr SA. *BMC Bioinformatics.* 2012;13(Suppl16):S9.

## Supplemental Tables



**Supplemental Table 1. List of proteins assayed on SOMAscan™ platform**

| <b>Protein</b>                      | <b>Protein Full Name</b>                                                                  | <b>EntrezGene Symbol</b>                        | <b>EntrezGene ID</b>                            | <b>UniProt ID</b>                                            |
|-------------------------------------|-------------------------------------------------------------------------------------------|-------------------------------------------------|-------------------------------------------------|--------------------------------------------------------------|
| 41                                  | Protein 4.1                                                                               | EPB41                                           | 2035                                            | P11171                                                       |
| 14-3-3                              | 14-3-3 protein family                                                                     | YWHAB,YWHAE,YWHAG,<br>YWHAH,YWHAQ,<br>YWHAZ,SFN | 7529, 7531, 7532,<br>7533, 10971, 7534,<br>2810 | P31946, P62258, P61981,<br>Q04917, P27348, P63104,<br>P31947 |
| 17-beta-HSD 1<br>3HIDH              | Estradiol 17-beta-dehydrogenase 1<br>3-hydroxyisobutyrate<br>dehydrogenase, mitochondrial | HSD17B1<br>HIBADH                               | 3292<br>11112                                   | P14061<br>P31937                                             |
| 40S ribosomal protein SA<br>4-1BB   | 40S ribosomal protein SA<br>Tumor necrosis factor receptor<br>superfamily member 9        | RPSA<br>TNFRSF9                                 | 3921<br>3604                                    | P08865<br>Q07011                                             |
| 4-1BB ligand                        | Tumor necrosis factor ligand<br>superfamily member 9                                      | TNFSF9                                          | 8744                                            | P41273                                                       |
| 4EBP2                               | Eukaryotic translation initiation factor<br>4E-binding protein 2                          | EIF4EBP2                                        | 1979                                            | Q13542                                                       |
| 6Ckine                              | C-C motif chemokine 21                                                                    | CCL21                                           | 6366                                            | O00585                                                       |
| 6-Phosphogluconate<br>dehydrogenase | 6-phosphogluconate<br>dehydrogenase, decarboxylating                                      | PGD                                             | 5226                                            | P52209                                                       |
| a1-Antichymotrypsin                 | Alpha-1-antichymotrypsin                                                                  | SERPINA3                                        | 12                                              | P01011                                                       |
| a1-Antitrypsin                      | Alpha-1-antitrypsin                                                                       | SERPINA1                                        | 5265                                            | P01009                                                       |
| a2-Antiplasmin                      | Alpha-2-antiplasmin                                                                       | SERPINF2                                        | 5345                                            | P08697                                                       |
| a2-HS-Glycoprotein                  | Alpha-2-HS-glycoprotein                                                                   | AHSG                                            | 197                                             | P02765                                                       |
| a2-Macroglobulin                    | Alpha-2-macroglobulin                                                                     | A2M                                             | 2                                               | P01023                                                       |
| ABL1                                | Tyrosine-protein kinase ABL1                                                              | ABL1                                            | 25                                              | P00519                                                       |
| ABL2                                | Abelson tyrosine-protein kinase 2                                                         | ABL2                                            | 27                                              | P42684                                                       |
| ACE2                                | Angiotensin-converting enzyme 2                                                           | ACE2                                            | 59272                                           | Q9BYF1                                                       |
| ACTH                                | Corticotropin                                                                             | POMC                                            | 5443                                            | P01189                                                       |
| Activated Protein C                 | Activated Protein C                                                                       | PROC                                            | 5624                                            | P04070                                                       |
| Activin A                           | Inhibin beta A chain                                                                      | INHBA                                           | 3624                                            | P08476                                                       |
| Activin AB                          | Inhibin beta A chain:Inhibin beta B<br>chain heterodimer                                  | INHBA INHBB                                     | 3624 3625                                       | P08476, P09529                                               |
| Activin RIB                         | Activin receptor type-1B                                                                  | ACVR1B                                          | 91                                              | P36896                                                       |
| ADAM 9                              | Disintegrin and metalloproteinase<br>domain-containing protein 9                          | ADAM9                                           | 8754                                            | Q13443                                                       |
| ADAM12                              | Disintegrin and metalloproteinase                                                         | ADAM12                                          | 8038                                            | O43184                                                       |

|                                     |                                                                                                     |                         |                |                        |
|-------------------------------------|-----------------------------------------------------------------------------------------------------|-------------------------|----------------|------------------------|
| ADAMTS-4                            | domain-containing protein 12<br>A disintegrin and metalloproteinase<br>with thrombospondin motifs 4 | ADAMTS4                 | 9507           | O75173                 |
| ADAMTS-5                            | A disintegrin and metalloproteinase<br>with thrombospondin motifs 5                                 | ADAMTS5                 | 11096          | Q9UNA0                 |
| Adiponectin                         | Adiponectin                                                                                         | ADIPOQ                  | 9370           | Q15848                 |
| Afamin                              | Afamin                                                                                              | AFM                     | 173            | P43652                 |
| Aflatoxin B1 aldehyde<br>reductase  | Aflatoxin B1 aldehyde reductase<br>member 2                                                         | AKR7A2                  | 8574           | O43488                 |
| Aggrecan                            | Aggrecan core protein                                                                               | ACAN                    | 176            | P16112                 |
| AGR2                                | Anterior gradient protein 2 homolog                                                                 | AGR2                    | 10551          | O95994                 |
| AIF1                                | Allograft inflammatory factor 1                                                                     | AIF1                    | 199            | P55008                 |
| AIP                                 | AH receptor-interacting protein                                                                     | AIP                     | 9049           | O00170                 |
| AK1A1                               | Alcohol dehydrogenase [NADP(+)]                                                                     | AKR1A1                  | 10327          | P14550                 |
| Albumin                             | Serum albumin                                                                                       | ALB                     | 213            | P02768                 |
| ALCAM                               | CD166 antigen                                                                                       | ALCAM                   | 214            | Q13740                 |
| ALK-1                               | Serine/threonine-protein kinase<br>receptor R3                                                      | ACVRL1                  | 94             | P37023                 |
| Alkaline phosphatase,<br>bone       | Alkaline phosphatase, tissue-<br>nonspecific isozyme                                                | ALPL                    | 249            | P05186                 |
| alpha-1-antichymotrypsin<br>complex | alpha-1-antichymotrypsin complex                                                                    | SERPINA3                |                | P07288, P01011         |
| ALT                                 | Alanine aminotransferase 1                                                                          | GPT                     | 2875           | P24298                 |
| AMHR2                               | Anti-Muellerian hormone type-2<br>receptor                                                          | AMHR2                   | 269            | Q16671                 |
| Aminoacylase-1                      | Aminoacylase-1                                                                                      | ACY1                    | 95             | Q03154                 |
| AMNLS                               | Protein amnionless                                                                                  | AMN                     | 81693          | Q9BXJ7                 |
| AMPK a1b1g1                         | AMP Kinase (alpha1beta1gamma1)                                                                      | PRKAA1 PRKAB1<br>PRKAG1 | 5562 5564 5571 | Q13131, Q9Y478, P54619 |
| AMPK a2b2g1                         | AMP Kinase (alpha2beta2gamma1)                                                                      | PRKAA2 PRKAB2<br>PRKAG1 | 5563 5565 5571 | P54646, O43741, P54619 |
| AMPM2                               | Methionine aminopeptidase 2                                                                         | METAP2                  | 10988          | P50579                 |
| amyloid precursor protein           | Amyloid beta A4 protein                                                                             | APP                     | 351            | P05067                 |
| AN32B                               | Acidic leucine-rich nuclear<br>phosphoprotein 32 family member B                                    | ANP32B                  | 10541          | Q92688                 |
| Angiogenin                          | Angiogenin                                                                                          | ANG                     | 283            | P03950                 |
| Angiopoietin-1                      | Angiopoietin-1                                                                                      | ANGPT1                  | 284            | Q15389                 |
| Angiopoietin-2                      | Angiopoietin-2                                                                                      | ANGPT2                  | 285            | O15123                 |

|                         |                                                  |          |        |        |
|-------------------------|--------------------------------------------------|----------|--------|--------|
| Angiopoietin-4          | Angiopoietin-4                                   | ANGPT4   | 51378  | Q9Y264 |
| Angiostatin             | Angiostatin                                      | PLG      | 5340   | P00747 |
| Angiotensinogen         | Angiotensinogen                                  | AGT      | 183    | P01019 |
| ANGL3                   | Angiopoietin-related protein 3                   | ANGPTL3  | 27329  | Q9Y5C1 |
| ANGL4                   | Angiopoietin-related protein 4                   | ANGPTL4  | 51129  | Q9BY76 |
| Annexin I               | Annexin A1                                       | ANXA1    | 301    | P04083 |
| Annexin II              | Annexin A2                                       | ANXA2    | 302    | P07355 |
| Annexin VI              | Annexin A6                                       | ANXA6    | 309    | P08133 |
| ANP                     | Atrial natriuretic factor                        | NPPA     | 4878   | P01160 |
| Antithrombin III        | Antithrombin-III                                 | SERPINC1 | 462    | P01008 |
| Apo A-I                 | Apolipoprotein A-I                               | APOA1    | 335    | P02647 |
| Apo B                   | Apolipoprotein B                                 | APOB     | 338    | P04114 |
| Apo D                   | Apolipoprotein D                                 | APOD     | 347    | P05090 |
| Apo E                   | Apolipoprotein E                                 | APOE     | 348    | P02649 |
| Apo E2                  | Apolipoprotein E (isoform E2)                    | APOE     | 348    | P02649 |
| Apo E3                  | Apolipoprotein E (isoform E3)                    | APOE     | 348    | P02649 |
| Apo E4                  | Apolipoprotein E (isoform E4)                    | APOE     | 348    | P02649 |
| AREG                    | Amphiregulin                                     | AREG     | 374    | P15514 |
| ARG11                   | Arginase-1                                       | ARG1     | 383    | P05089 |
| ARI3A                   | AT-rich interactive domain-containing protein 3A | ARID3A   | 1820   | Q99856 |
| ARMEL                   | Cerebral dopamine neurotrophic factor            | CDNF     | 441549 | Q49AH0 |
| ARP19                   | cAMP-regulated phosphoprotein 19                 | ARPP19   | 10776  | P56211 |
| ARSB                    | Arylsulfatase B                                  | ARSB     | 411    | P15848 |
| ART                     | Agouti-related protein                           | AGRP     | 181    | O00253 |
| Artemin                 | Artemin                                          | ARTN     | 9048   | Q5T4W7 |
| ARTS1                   | Endoplasmic reticulum aminopeptidase 1           | ERAP1    | 51752  | Q9NZ08 |
| Arylsulfatase A         | Arylsulfatase A                                  | ARSA     | 410    | P15289 |
| ASAH2                   | Neutral ceramidase                               | ASAH2    | 56624  | Q9NR71 |
| ASAHL                   | N-acylethanolamine-hydrolyzing acid amidase      | NAAA     | 27163  | Q02083 |
| ASGR1                   | Asialoglycoprotein receptor 1                    | ASGR1    | 432    | P07306 |
| ASM3A                   | Acid sphingomyelinase-like phosphodiesterase 3a  | SMPDL3A  | 10924  | Q92484 |
| ATP synthase beta chain | ATP synthase subunit beta,                       | ATP5B    | 506    | P06576 |

|                     |                                                                   |           |        |        |
|---------------------|-------------------------------------------------------------------|-----------|--------|--------|
|                     | mitochondrial                                                     |           |        |        |
| ATS1                | A disintegrin and metalloproteinase with thrombospondin motifs 1  | ADAMTS1   | 9510   | Q9UHI8 |
| ATS13               | A disintegrin and metalloproteinase with thrombospondin motifs 13 | ADAMTS13  | 11093  | Q76LX8 |
| ATS15               | A disintegrin and metalloproteinase with thrombospondin motifs 15 | ADAMTS15  | 170689 | Q8TE58 |
| AURKB               | Aurora kinase B                                                   | AURKB     | 9212   | Q96GD4 |
| Aurora kinase A     | Aurora kinase A                                                   | AURKA     | 6790   | O14965 |
| Azurocidin          | Azurocidin                                                        | AZU1      | 566    | P20160 |
| b2-Microglobulin    | Beta-2-microglobulin                                              | B2M       | 567    | P61769 |
| B7                  | T-lymphocyte activation antigen CD80                              | CD80      | 941    | P33681 |
| B7-2                | T-lymphocyte activation antigen CD86                              | CD86      | 942    | P42081 |
| B7-H1               | Programmed cell death 1 ligand 1                                  | CD274     | 29126  | Q9NZQ7 |
| B7-H2               | ICOS ligand                                                       | ICOSLG    | 23308  | O75144 |
| BAFF                | Tumor necrosis factor ligand superfamily member 13B               | TNFSF13B  | 10673  | Q9Y275 |
| BAFF Receptor       | Tumor necrosis factor receptor superfamily member 13C             | TNFRSF13C | 115650 | Q96RJ3 |
| BARK1               | beta-adrenergic receptor kinase 1                                 | ADRBK1    | 156    | P25098 |
| BASI                | Basigin                                                           | BSG       | 682    | P35613 |
| BCAM                | Basal Cell Adhesion Molecule                                      | BCAM      | 4059   | P50895 |
| BCAR3               | Breast cancer anti-estrogen resistance protein 3                  | BCAR3     | 8412   | O75815 |
| Bcl-2               | Apoptosis regulator Bcl-2                                         | BCL2      | 596    | P10415 |
| BCL2-like 1 protein | Bcl-2-like protein 1                                              | BCL2L1    | 598    | Q07817 |
| BCMA                | Tumor necrosis factor receptor superfamily member 17              | TNFRSF17  | 608    | Q02223 |
| BDNF                | Brain-derived neurotrophic factor                                 | BDNF      | 627    | P23560 |
| b-ECGF              | Fibroblast growth factor 1                                        | FGF1      | 2246   | P05230 |
| b-Endorphin         | Beta-endorphin                                                    | POMC      | 5443   | P01189 |
| bFGF                | Fibroblast growth factor 2                                        | FGF2      | 2247   | P09038 |
| bFGF-R              | Fibroblast growth factor receptor 1                               | FGFR1     | 2260   | P11362 |
| BFL1                | Bcl-2-related protein A1                                          | BCL2A1    | 597    | Q16548 |
| BGH3                | Transforming growth factor-beta-induced protein ig-h3             | TGFBI     | 7045   | Q15582 |

|                       |                                                                      |                |             |                        |
|-----------------------|----------------------------------------------------------------------|----------------|-------------|------------------------|
| BGN                   | Biglycan                                                             | BGN            | 633         | P21810                 |
| BLC                   | C-X-C motif chemokine 13                                             | CXCL13         | 10563       | O43927                 |
| BMP RII               | Bone morphogenetic protein receptor type-2                           | BMPR2          | 659         | Q13873                 |
| BMP-1                 | Bone morphogenetic protein 1                                         | BMP1           | 649         | P13497                 |
| BMP10                 | Bone morphogenetic protein 10                                        | BMP10          | 27302       | O95393                 |
| BMP-14                | Growth/differentiation factor 5                                      | GDF5           | 8200        | P43026                 |
| BMP-6                 | Bone morphogenetic protein 6                                         | BMP6           | 654         | P22004                 |
| BMP-7                 | Bone morphogenetic protein 7                                         | BMP7           | 655         | P18075                 |
| BMPER                 | BMP-binding endothelial regulator protein                            | BMPER          | 168667      | Q8N8U9                 |
| BMPR1A                | Bone morphogenetic protein receptor type-1A                          | BMPR1A         | 657         | P36894                 |
| BMX                   | Cytoplasmic tyrosine-protein kinase BMX                              | BMX            | 660         | P51813                 |
| b-NGF                 | beta-nerve growth factor                                             | NGF            | 4803        | P01138                 |
| BNP-32                | Brain natriuretic peptide 32                                         | NPPB           | 4879        | P16860                 |
| BOC                   | Brother of CDO                                                       | BOC            | 91653       | Q9BWW1                 |
| Bone proteoglycan II  | Decorin                                                              | DCN            | 1634        | P07585                 |
| BPI                   | Bactericidal permeability-increasing protein                         | BPI            | 671         | P17213                 |
| BRF-1                 | Transcription factor IIIB 90 kDa subunit                             | BRF1           | 2972        | Q92994                 |
| BSP                   | Bone sialoprotein 2                                                  | IBSP           | 3381        | P21815                 |
| BSSP4                 | Brain-specific serine protease 4                                     | PRSS22         | 64063       | Q9GZN4                 |
| BST1                  | ADP-ribosyl cyclase/cyclic ADP-ribose hydrolase 2                    | BST1           | 683         | Q10588                 |
| BTK                   | Tyrosine-protein kinase BTK                                          | BTK            | 695         | Q06187                 |
| C1-Esterase Inhibitor | Plasma protease C1 inhibitor                                         | SERPING1       | 710         | P05155                 |
| C1q                   | Complement C1q subcomponent                                          | C1QA C1QB C1QC | 712 713 714 | P02745, P02746, P02747 |
| C1QBP                 | Complement component 1 Q subcomponent-binding protein, mitochondrial | C1QBP          | 708         | Q07021                 |
| C1r                   | Complement C1r subcomponent                                          | C1R            | 715         | P00736                 |
| C1s                   | Complement C1s subcomponent                                          | C1S            | 716         | P09871                 |
| C2                    | Complement C2                                                        | C2             | 717         | P06681                 |
| C3                    | Complement C3                                                        | C3             | 718         | P01024                 |
| C34 gp41 HIV Fragment | gp41 C34 peptide, HIV                                                | Human-virus    |             | Q70626                 |

|                 |                                                                   |               |             |                        |
|-----------------|-------------------------------------------------------------------|---------------|-------------|------------------------|
| C3a             | C3a anaphylatoxin                                                 | C3            | 718         | P01024                 |
| C3adesArg       | C3a anaphylatoxin des Arginine                                    | C3            | 718         | P01024                 |
| C3b             | Complement C3b                                                    | C3            | 718         | P01024                 |
| C3d             | Complement C3d fragment                                           | C3            | 718         | P01024                 |
| C4              | Complement C4                                                     | C4A C4B       | 720 721     | P0C0L4, P0C0L5         |
| C4b             | Complement C4b                                                    | C4A C4B       | 720 721     | P0C0L4 P0C0L5          |
| C5              | Complement C5                                                     | C5            | 727         | P01031                 |
| C5a             | C5a anaphylatoxin                                                 | C5            | 727         | P01031                 |
| C5b, 6 Complex  | Complement C5b-C6 complex                                         | C5 C6         | 727 729     | P01031,P13671          |
| C6              | Complement component C6                                           | C6            | 729         | P13671                 |
| C7              | Complement component C7                                           | C7            | 730         | P10643                 |
| C8              | Complement component C8                                           | C8A C8B C8G   | 731 732 733 | P07357, P07358, P07360 |
| C9              | Complement component C9                                           | C9            | 735         | P02748                 |
| CAD15           | Cadherin-15                                                       | CDH15         | 1013        | P55291                 |
| Cadherin E      | Cadherin-1                                                        | CDH1          | 999         | P12830                 |
| Cadherin-12     | Cadherin-12                                                       | CDH12         | 1010        | P55289                 |
| Cadherin-2      | Cadherin-2                                                        | CDH2          | 1000        | P19022                 |
| Cadherin-5      | Cadherin-5                                                        | CDH5          | 1003        | P33151                 |
| Cadherin-6      | Cadherin-6                                                        | CDH6          | 1004        | P55285                 |
| Calcineurin     | Calcineurin                                                       | PPP3CA PPP3R1 | 5530 5534   | Q08209, P63098         |
| Calcineurin B a | Calcineurin subunit B type 1                                      | PPP3R1        | 5534        | P63098                 |
| calgranulin B   | Protein S100-A9                                                   | S100A9        | 6280        | P06702                 |
| Calpain I       | Calpain I                                                         | CAPN1 CAPNS1  | 823 826     | P07384, P04632         |
| Calpastatin     | Calpastatin                                                       | CAST          | 831         | P20810                 |
| calreticulin    | Calreticulin                                                      | CALR          | 811         | P27797                 |
| CAMK1           | Calcium/calmodulin-dependent protein kinase type 1                | CAMK1         | 8536        | Q14012                 |
| CAMK1D          | Calcium/calmodulin-dependent protein kinase type 1D               | CAMK1D        | 57118       | Q8IU85                 |
| CAMK2A          | Calcium/calmodulin-dependent protein kinase type II subunit alpha | CAMK2A        | 815         | Q9UQM7                 |
| CAMK2B          | Calcium/calmodulin-dependent protein kinase type II subunit beta  | CAMK2B        | 816         | Q13554                 |
| CAMK2D          | Calcium/calmodulin-dependent protein kinase type II subunit delta | CAMK2D        | 817         | Q13557                 |
| CaMKK alpha     | Calcium/calmodulin-dependent protein kinase kinase 1              | CAMKK1        | 84254       | Q8N5S9                 |

|                         |                                                 |          |        |        |
|-------------------------|-------------------------------------------------|----------|--------|--------|
| CAPG                    | Macrophage-capping protein                      | CAPG     | 822    | P40121 |
| Carbonic anhydrase 6    | Carbonic anhydrase 6                            | CA6      | 765    | P23280 |
| Carbonic anhydrase 9    | Carbonic anhydrase 9                            | CA9      | 768    | Q16790 |
| Carbonic anhydrase I    | Carbonic anhydrase 1                            | CA1      | 759    | P00915 |
| Carbonic anhydrase II   | Carbonic anhydrase 2                            | CA2      | 760    | P00918 |
| Carbonic anhydrase III  | Carbonic anhydrase 3                            | CA3      | 761    | P07451 |
| Carbonic Anhydrase IV   | Carbonic anhydrase 4                            | CA4      | 762    | P22748 |
| Carbonic anhydrase VII  | Carbonic anhydrase 7                            | CA7      | 766    | P43166 |
| Carbonic Anhydrase X    | Carbonic anhydrase-related protein 10           | CA10     | 56934  | Q9NS85 |
| Carbonic anhydrase XIII | Carbonic anhydrase 13                           | CA13     | 377677 | Q8N1Q1 |
| Cardiotrophin-1         | Cardiotrophin-1                                 | CTF1     | 1489   | Q16619 |
| Caspase-10              | Caspase-10                                      | CASP10   | 843    | Q92851 |
| Caspase-2               | Caspase-2                                       | CASP2    | 835    | P42575 |
| Caspase-3               | Caspase-3                                       | CASP3    | 836    | P42574 |
| Catalase                | Catalase                                        | CAT      | 847    | P04040 |
| CATC                    | Dipeptidyl peptidase 1                          | CTSC     | 1075   | P53634 |
| CATE                    | Cathepsin E                                     | CTSE     | 1510   | P14091 |
| Cathepsin A             | Lysosomal protective protein                    | CTSA     | 5476   | P10619 |
| Cathepsin B             | Cathepsin B                                     | CTSB     | 1508   | P07858 |
| Cathepsin D             | Cathepsin D                                     | CTSD     | 1509   | P07339 |
| Cathepsin G             | Cathepsin G                                     | CTSG     | 1511   | P08311 |
| Cathepsin H             | Cathepsin H                                     | CTSH     | 1512   | P09668 |
| Cathepsin S             | Cathepsin S                                     | CTSS     | 1520   | P25774 |
| Cathepsin V             | Cathepsin L2                                    | CTSV     | 1515   | O60911 |
| CATZ                    | Cathepsin Z                                     | CTSZ     | 1522   | Q9UBR2 |
| CBG                     | Corticosteroid-binding globulin                 | SERPINA6 | 866    | P08185 |
| CBPE                    | Carboxypeptidase E                              | CPE      | 1363   | P16870 |
| CBX5                    | Chromobox protein homolog 5                     | CBX5     | 23468  | P45973 |
| CCL28                   | C-C motif chemokine 28                          | CCL28    | 56477  | Q9NRJ3 |
| CD109                   | CD109 antigen                                   | CD109    | 135228 | Q6YHK3 |
| CD22                    | B-cell receptor CD22                            | CD22     | 933    | P20273 |
| CD226                   | CD226 antigen                                   | CD226    | 10666  | Q15762 |
| CD23                    | Low affinity immunoglobulin epsilon Fc receptor | FCER2    | 2208   | P06734 |
| CD27                    | CD27 antigen                                    | CD27     | 939    | P26842 |
| CD30                    | Tumor necrosis factor receptor                  | TNFRSF8  | 943    | P28908 |

|                      |                                                                                |             |           |                |
|----------------------|--------------------------------------------------------------------------------|-------------|-----------|----------------|
| CD30 Ligand          | superfamily member 8<br>Tumor necrosis factor ligand                           | TNFSF8      | 944       | P32971         |
| CD36 ANTIGEN         | superfamily member 8<br>Platelet glycoprotein 4                                | CD36        | 948       | P16671         |
| CD39                 | Ectonucleoside triphosphate<br>diphosphohydrolase 1                            | ENTPD1      | 953       | P49961         |
| CD40 ligand, soluble | CD40 ligand                                                                    | CD40LG      | 959       | P29965         |
| CD48                 | CD48 antigen                                                                   | CD48        | 962       | P09326         |
| CD5L                 | CD5 antigen-like                                                               | CD5L        | 922       | O43866         |
| CD70                 | CD70 antigen                                                                   | CD70        | 970       | P32970         |
| CD97                 | CD97 antigen                                                                   | CD97        | 976       | P48960         |
| CDC37                | Hsp90 co-chaperone Cdc37                                                       | CDC37       | 11140     | Q16543         |
| CDK1/cyclin B        | Cyclin-dependent kinase<br>1:G2/mitotic-specific cyclin-B1<br>complex          | CDC2 CCNB1  | 983 891   | P06493, P14635 |
| CDK2/cyclin A        | Cyclin-dependent kinase 2:Cyclin-A2<br>complex                                 | CDK2 CCNA2  | 1017 890  | P24941, P20248 |
| CDK5/p35             | Cyclin-dependent kinase 5:Cyclin-<br>dependent kinase 5 activator 1<br>complex | CDK5 CDK5R1 | 1020 8851 | Q00535, Q15078 |
| CDK8/cyclin C        | Cyclin-dependent kinase 8:Cyclin-C<br>complex                                  | CDK8 CCNC   | 1024 892  | P49336, P24863 |
| CDON                 | Cell adhesion molecule-<br>related/down-regulated by<br>oncogenes              | CDON        | 50937     | Q4KMG0         |
| CFC1                 | Cryptic protein                                                                | CFC1        | 55997     | P0CG37         |
| cGMP-stimulated PDE  | cGMP-dependent 3',5'-cyclic<br>phosphodiesterase                               | PDE2A       | 5138      | O00408         |
| Chitotriosidase-1    | Chitotriosidase-1                                                              | CHIT1       | 1118      | Q13231         |
| CHK1                 | Serine/threonine-protein kinase<br>Chk1                                        | CHEK1       | 1111      | O14757         |
| Chk2                 | Serine/threonine-protein kinase<br>Chk2                                        | CHEK2       | 11200     | O96017         |
| CHL1                 | Neural cell adhesion molecule L1-<br>like protein                              | CHL1        | 10752     | O00533         |
| CHST2                | Carbohydrate sulfotransferase 2                                                | CHST2       | 9435      | Q9Y4C5         |
| CHST6                | Carbohydrate sulfotransferase 6                                                | CHST6       | 4166      | Q9GZX3         |
| Chymase              | Chymase                                                                        | CMA1        | 1215      | P23946         |
| CIAP-2               | Baculoviral IAP repeat-containing                                              | BIRC3       | 330       | Q13489         |



|                         |                                                                              |                |            |                |
|-------------------------|------------------------------------------------------------------------------|----------------|------------|----------------|
|                         | protein 3                                                                    |                |            |                |
| CK2-A1:B                | Casein kinase II 2-alpha:2-beta heterotetramer                               | CSNK2A1 CSNK2B | 1457 1460  | P68400, P67870 |
| CK2-A2:B                | Casein kinase II 2-alpha':2-beta heterotetramer                              | CSNK2A2 CSNK2B | 1459 1460  | P19784, P67870 |
| CKAP2                   | Cytoskeleton-associated protein 2                                            | CKAP2          | 26586      | Q8WWK9         |
| Ck-b-8-1                | Ck-beta-8-1                                                                  | CCL23          | 6368       | P55773         |
| CK-BB                   | Creatine kinase B-type                                                       | CKB            | 1152       | P12277         |
| CK-MB                   | Creatine kinase M-type:Creatine kinase B-type heterodimer                    | CKB CKM        | 1152 1158  | P12277, P06732 |
| CK-MM                   | Creatine kinase M-type                                                       | CKM            | 1158       | P06732         |
| CLC1B                   | C-type lectin domain family 1 member B                                       | CLEC1B         | 51266      | Q9P126         |
| CLC4K                   | C-type lectin domain family 4 member K                                       | CD207          | 50489      | Q9UJ71         |
| CLC7A                   | C-type lectin domain family 7 member A                                       | CLEC7A         | 64581      | Q9BXN2         |
| CLF-1/CLC Complex       | Cytokine receptor-like factor 1:Cardiotrophin-like cytokine factor 1 Complex | CRLF1 CLCF1    | 9244 23529 | O75462, Q9UBD9 |
| CLM6                    | CMRF35-like molecule 6                                                       | CD300C         | 10871      | Q08708         |
| Clusterin               | Clusterin                                                                    | CLU            | 1191       | P10909         |
| CNDP1                   | Beta-Ala-His dipeptidase                                                     | CNDP1          | 84735      | Q96KN2         |
| CNTF                    | Ciliary Neurotrophic Factor                                                  | CNTF           | 1270       | P26441         |
| CNTFR alpha             | Ciliary neurotrophic factor receptor subunit alpha                           | CNTFR          | 1271       | P26992         |
| CNTN2                   | Contactin-2                                                                  | CNTN2          | 6900       | Q02246         |
| CO8A1                   | Collagen alpha-1(VIII) chain                                                 | COL8A1         | 1295       | P27658         |
| Coactosin-like protein  | Coactosin-like protein                                                       | COTL1          | 23406      | Q14019         |
| Coagulation Factor IX   | Coagulation factor IX                                                        | F9             | 2158       | P00740         |
| Coagulation Factor IXab | Coagulation factor IXab                                                      | F9             | 2158       | P00740         |
| Coagulation Factor V    | Coagulation Factor V                                                         | F5             | 2153       | P12259         |
| Coagulation Factor VII  | Coagulation Factor VII                                                       | F7             | 2155       | P08709         |
| Coagulation Factor X    | Coagulation Factor X                                                         | F10            | 2159       | P00742         |
| Coagulation Factor Xa   | Coagulation factor Xa                                                        | F10            | 2159       | P00742         |
| Coagulation Factor XI   | Coagulation Factor XI                                                        | F11            | 2160       | P03951         |
| Cofilin-1               | Cofilin-1                                                                    | CFL1           | 1072       | P23528         |
| COLEC12                 | Collectin-12                                                                 | COLEC12        | 81035      | Q5KU26         |

|                               |                                                      |         |        |         |
|-------------------------------|------------------------------------------------------|---------|--------|---------|
| Collectin Kidney 1            | Collectin-11                                         | COLEC11 | 78989  | Q9BWP8  |
| COMMD7                        | COMM domain-containing protein 7                     | COMMD7  | 149951 | Q86VX2  |
| complement factor H-related 5 | Complement factor H-related protein 5                | CFHR5   | 81494  | Q9BXR6  |
| CONA1                         | Collagen alpha-1(XXIII) chain                        | COL23A1 | 91522  | Q86Y22  |
| Contactin-1                   | Contactin-1                                          | CNTN1   | 1272   | Q12860  |
| Contactin-4                   | Contactin-4                                          | CNTN4   | 152330 | Q8I WV2 |
| Contactin-5                   | Contactin-5                                          | CNTN5   | 53942  | O94779  |
| COX-2                         | Prostaglandin G/H synthase 2                         | PTGS2   | 5743   | P35354  |
| CPNE1                         | Copine-1                                             | CPNE1   | 8904   | Q99829  |
| CRDL1                         | Chordin-like protein 1                               | CHRD1   | 91851  | Q9BU40  |
| Cripto                        | Teratocarcinoma-derived growth factor 1              | TDGF1   | 6997   | P13385  |
| CRIS3                         | Cysteine-rich secretory protein 3                    | CRISP3  | 10321  | P54108  |
| CRK                           | Adapter molecule crk                                 | CRK     | 1398   | P46108  |
| CRP                           | C-reactive protein                                   | CRP     | 1401   | P02741  |
| CRTAM                         | Cytotoxic and regulatory T-cell molecule             | CRTAM   | 56253  | O95727  |
| CSF-1                         | Macrophage colony-stimulating factor 1               | CSF1    | 1435   | P09603  |
| CSK                           | Tyrosine-protein kinase CSK                          | CSK     | 1445   | P41240  |
| CSK21                         | Casein kinase II subunit alpha                       | CSNK2A1 | 1457   | P68400  |
| CTACK                         | C-C motif chemokine 27                               | CCL27   | 10850  | Q9Y4X3  |
| CTAP-III                      | Connective tissue-activating peptide III             | PPBP    | 5473   | P02775  |
| CTGF                          | Connective tissue growth factor                      | CTGF    | 1490   | P29279  |
| CTLA-4                        | Cytotoxic T-lymphocyte protein 4                     | CTLA4   | 1493   | P16410  |
| CXCL16, soluble               | C-X-C motif chemokine 16                             | CXCL16  | 58191  | Q9H2A7  |
| Cyclin B1                     | G2/mitotic-specific cyclin-B1                        | CCNB1   | 891    | P14635  |
| Cyclophilin A                 | Peptidyl-prolyl cis-trans isomerase A                | PPIA    | 5478   | P62937  |
| Cyclophilin F                 | Peptidyl-prolyl cis-trans isomerase F, mitochondrial | PPIF    | 10105  | P30405  |
| Cystatin C                    | Cystatin-C                                           | CST3    | 1471   | P01034  |
| Cystatin M                    | Cystatin-M                                           | CST6    | 1474   | Q15828  |
| Cystatin-S                    | Cystatin-S                                           | CST4    | 1472   | P01036  |
| CYTD                          | Cystatin-D                                           | CST5    | 1473   | P28325  |
| CYTF                          | Cystatin-F                                           | CST7    | 8530   | O76096  |

|                             |                                                         |             |                |                        |
|-----------------------------|---------------------------------------------------------|-------------|----------------|------------------------|
| Cytidylate kinase           | UMP-CMP kinase                                          | CMPK1       | 51727          | P30085                 |
| CYTN                        | Cystatin-SN                                             | CST1        | 1469           | P01037                 |
| Cytochrome c                | Cytochrome c                                            | CYCS        | 54205          | P99999                 |
| Cytochrome P450 3A4         | Cytochrome P450 3A4                                     | CYP3A4      | 1576           | P08684                 |
| CYTT                        | Cystatin-SA                                             | CST2        | 1470           | P09228                 |
| DAF                         | Complement decay-accelerating factor                    | CD55        | 1604           | P08174                 |
| DAN                         | Neuroblastoma suppressor of tumorigenicity 1            | NBL1        | 4681           | P41271                 |
| DAPK2                       | Death-associated protein kinase 2                       | DAPK2       | 23604          | Q9UIK4                 |
| DBNL                        | Drebrin-like protein                                    | DBNL        | 28988          | Q9UJU6                 |
| DcR3                        | Tumor necrosis factor receptor superfamily member 6B    | TNFRSF6B    | 8771           | O95407                 |
| DC-SIGN                     | CD209 antigen                                           | CD209       | 30835          | Q9NNX6                 |
| DC-SIGNR                    | C-type lectin domain family 4 member M                  | CLEC4M      | 10332          | Q9H2X3                 |
| D-dimer                     | D-dimer                                                 | FGA FGB FGG | 2243 2244 2266 | P02671, P02675, P02679 |
| DEAD-box protein 19B        | ATP-dependent RNA helicase DDX19B                       | DDX19B      | 11269          | Q9UMR2                 |
| DERM                        | Dermatopontin                                           | DPT         | 1805           | Q07507                 |
| Desmoglein-1                | Desmoglein-1                                            | DSG1        | 1828           | Q02413                 |
| Desmoglein-2                | Desmoglein-2                                            | DSG2        | 1829           | Q14126                 |
| DHH                         | Desert hedgehog protein N-product                       | DHH         | 50846          | O43323                 |
| Discoidin domain receptor 1 | Epithelial discoidin domain-containing receptor 1       | DDR1        | 780            | Q08345                 |
| Discoidin domain receptor 2 | Discoidin domain-containing receptor 2                  | DDR2        | 4921           | Q16832                 |
| DKK1                        | Dickkopf-related protein 1                              | DKK1        | 22943          | O94907                 |
| DKK3                        | Dickkopf-related protein 3                              | DKK3        | 27122          | Q9UBP4                 |
| Dkk-4                       | Dickkopf-related protein 4                              | DKK4        | 27121          | Q9UBT3                 |
| DLC8                        | Dynein light chain 1, cytoplasmic                       | DYNLL1      | 8655           | P63167                 |
| DLL1                        | Delta-like protein 1                                    | DLL1        | 28514          | O00548                 |
| DLL4                        | Delta-like protein 4                                    | DLL4        | 54567          | Q9NR61                 |
| DLRB1                       | Dynein light chain roadblock-type 1                     | DYNLRB1     | 83658          | Q9NP97                 |
| DMP1                        | Dentin matrix acidic phosphoprotein 1                   | DMP1        | 1758           | Q13316                 |
| DnaJ homolog                | Mitochondrial import inner membrane translocase subunit | DNAJC19     | 131118         | Q96DA6                 |

|                    |                                                               |          |       |        |
|--------------------|---------------------------------------------------------------|----------|-------|--------|
|                    | TIM14                                                         |          |       |        |
| Dopa decarboxylase | Aromatic-L-amino-acid decarboxylase                           | DDC      | 1644  | P20711 |
| DPP2               | Dipeptidyl peptidase 2                                        | DPP7     | 29952 | Q9UHL4 |
| DR3                | Tumor necrosis factor receptor superfamily member 25          | TNFRSF25 | 8718  | Q93038 |
| DR6                | Tumor necrosis factor receptor superfamily member 21          | TNFRSF21 | 27242 | O75509 |
| DRAK2              | Serine/threonine-protein kinase 17B                           | STK17B   | 9262  | O94768 |
| DRG-1              | Vacuolar protein sorting-associated protein VTA1 homolog      | VTA1     | 51534 | Q9NP79 |
| DRR1               | Protein FAM107A                                               | FAM107A  | 11170 | O95990 |
| DSC3               | Desmocollin-3                                                 | DSC3     | 1825  | Q14574 |
| Dtk                | Tyrosine-protein kinase receptor TYRO3                        | TYRO3    | 7301  | Q06418 |
| DUS3               | Dual specificity protein phosphatase 3                        | DUSP3    | 1845  | P51452 |
| Dynactin subunit 2 | Dynactin subunit 2                                            | DCTN2    | 10540 | Q13561 |
| DYRK3              | Dual specificity tyrosine-phosphorylation-regulated kinase 3  | DYRK3    | 8444  | O43781 |
| ECM1               | Extracellular matrix protein 1                                | ECM1     | 1893  | Q16610 |
| EDA                | Ectodysplasin-A, secreted form                                | EDA      | 1896  | Q92838 |
| EDAR               | Tumor necrosis factor receptor superfamily member EDAR        | EDAR     | 10913 | Q9UNE0 |
| EF-1-beta          | Elongation factor 1-beta                                      | EEF1B2   | 1933  | P24534 |
| EG-VEGF            | Prokineticin-1                                                | PROK1    | 84432 | P58294 |
| eIF-5              | Eukaryotic translation initiation factor 5                    | EIF5     | 1983  | P55010 |
| eIF-5A-1           | Eukaryotic translation initiation factor 5A-1                 | EIF5A    | 1984  | P63241 |
| Elafin             | Elafin                                                        | PI3      | 5266  | P19957 |
| Elastase           | Neutrophil elastase                                           | ELANE    | 1991  | P08246 |
| EMAP-2             | Endothelial monocyte-activating polypeptide 2                 | AIMP1    | 9255  | Q12904 |
| EMR2               | EGF-like module-containing mucin-like hormone receptor-like 2 | EMR2     | 30817 | Q9UHX3 |
| ENA-78             | C-X-C motif chemokine 5                                       | CXCL5    | 6374  | P42830 |
| Endocan            | Endothelial cell-specific molecule 1                          | ESM1     | 11082 | Q9NQ30 |
| Endoglin           | Endoglin                                                      | ENG      | 2022  | P17813 |

|                                |                                                                  |          |        |        |
|--------------------------------|------------------------------------------------------------------|----------|--------|--------|
| Endostatin                     | Endostatin                                                       | COL18A1  | 80781  | P39060 |
| Endothelin-converting enzyme 1 | Endothelin-converting enzyme 1                                   | ECE1     | 1889   | P42892 |
| ENPP7                          | Ectonucleotide pyrophosphatase/phosphodiesterase family member 7 | ENPP7    | 339221 | Q6UWV6 |
| Enterokinase                   | Enteropeptidase                                                  | TMPRSS15 | 5651   | P98073 |
| ENTP3                          | Ectonucleoside triphosphate diphosphohydrolase 3                 | ENTPD3   | 956    | O75355 |
| ENTP5                          | Ectonucleoside triphosphate diphosphohydrolase 5                 | ENTPD5   | 957    | O75356 |
| Eotaxin                        | Eotaxin                                                          | CCL11    | 6356   | P51671 |
| Eotaxin-2                      | C-C motif chemokine 24                                           | CCL24    | 6369   | O00175 |
| EP15R                          | Epidermal growth factor receptor substrate 15-like 1             | EPS15L1  | 58513  | Q9UBC2 |
| EphA1                          | Ephrin type-A receptor 1                                         | EPHA1    | 2041   | P21709 |
| EPHA3                          | Ephrin type-A receptor 3                                         | EPHA3    | 2042   | P29320 |
| EphA5                          | Ephrin type-A receptor 5                                         | EPHA5    | 2044   | P54756 |
| EPHAA                          | Ephrin type-A receptor 10                                        | EPHA10   | 284656 | Q5JZY3 |
| EPHB2                          | Ephrin type-B receptor 2                                         | EPHB2    | 2048   | P29323 |
| EphB4                          | Ephrin type-B receptor 4                                         | EPHB4    | 2050   | P54760 |
| EphB6                          | Ephrin type-B receptor 6                                         | EPHB6    | 2051   | O15197 |
| Ephrin-A4                      | Ephrin-A4                                                        | EFNA4    | 1945   | P52798 |
| Ephrin-A5                      | Ephrin-A5                                                        | EFNA5    | 1946   | P52803 |
| Ephrin-B3                      | Ephrin-B3                                                        | EFNB3    | 1949   | Q15768 |
| EPI                            | Epiregulin                                                       | EREG     | 2069   | O14944 |
| Epithelial cell kinase         | Ephrin type-A receptor 2                                         | EPHA2    | 1969   | P29317 |
| Epo                            | Erythropoietin                                                   | EPO      | 2056   | P01588 |
| EPO-R                          | Erythropoietin receptor                                          | EPOR     | 2057   | P19235 |
| ER                             | Estrogen receptor                                                | ESR1     | 2099   | P03372 |
| ERAB                           | 3-hydroxyacyl-CoA dehydrogenase type-2                           | HSD17B10 | 3028   | Q99714 |
| ERBB1                          | Epidermal growth factor receptor                                 | EGFR     | 1956   | P00533 |
| ERBB2                          | Receptor tyrosine-protein kinase erbB-2                          | ERBB2    | 2064   | P04626 |
| ERBB3                          | Receptor tyrosine-protein kinase erbB-3                          | ERBB3    | 2065   | P21860 |
| ERBB4                          | Receptor tyrosine-protein kinase                                 | ERBB4    | 2066   | Q15303 |

|                     |                                                                 |               |           |                |
|---------------------|-----------------------------------------------------------------|---------------|-----------|----------------|
|                     | erbB-4                                                          |               |           |                |
| ERK-1               | Mitogen-activated protein kinase 3                              | MAPK3         | 5595      | P27361         |
| ERP29               | Endoplasmic reticulum resident protein 29                       | ERP29         | 10961     | P30040         |
| ESAM                | Endothelial cell-selective adhesion molecule                    | ESAM          | 90952     | Q96AP7         |
| Esterase D          | S-formylglutathione hydrolase                                   | ESD           | 2098      | P10768         |
| ETHE1               | Persulfide dioxygenase ETHE1, mitochondrial                     | ETHE1         | 23474     | O95571         |
| FABP                | Fatty acid-binding protein, heart                               | FABP3         | 2170      | P05413         |
| FABPE               | Fatty acid-binding protein, epidermal                           | FABP5         | 2171      | Q01469         |
| Factor B            | Complement factor B                                             | CFB           | 629       | P00751         |
| Factor D            | Complement factor D                                             | CFD           | 1675      | P00746         |
| Factor H            | Complement factor H                                             | CFH           | 3075      | P08603         |
| Factor I            | Complement factor I                                             | CFI           | 3426      | P05156         |
| FAK1                | Focal adhesion kinase 1                                         | PTK2          | 5747      | Q05397         |
| FAM107B             | Protein FAM107B                                                 | FAM107B       | 83641     | Q9H098         |
| Fas ligand, soluble | Tumor necrosis factor ligand superfamily member 6, soluble form | FASLG         | 356       | P48023         |
| FCAR                | Immunoglobulin alpha Fc receptor                                | FCAR          | 2204      | P24071         |
| FCG2A/B             | Low affinity immunoglobulin gamma Fc region receptor II-a/b     | FCGR2A FCGR2B |           | P12318, P31994 |
| FCG3B               | Low affinity immunoglobulin gamma Fc region receptor III-B      | FCGR3B        | 2215      | O75015         |
| FCGR1               | High affinity immunoglobulin gamma Fc receptor I                | FCGR1A        | 2209      | P12314         |
| FCN1                | Ficolin-1                                                       | FCN1          | 2219      | O00602         |
| FCN2                | Ficolin-2                                                       | FCN2          | 2220      | Q15485         |
| FCRL3               | Fc receptor-like protein 3                                      | FCRL3         | 115352    | Q96P31         |
| FER                 | Tyrosine-protein kinase Fer                                     | FER           | 2241      | P16591         |
| Ferritin            | Ferritin                                                        | FTH1 FTL      | 2495 2512 | P02794, P02792 |
| FETUB               | Fetuin-B                                                        | FETUB         | 26998     | Q9UGM5         |
| FGF-10              | Fibroblast growth factor 10                                     | FGF10         | 2255      | O15520         |
| FGF-12              | Fibroblast growth factor 12                                     | FGF12         | 2257      | P61328         |
| FGF-16              | Fibroblast growth factor 16                                     | FGF16         | 8823      | O43320         |
| FGF-17              | Fibroblast growth factor 17                                     | FGF17         | 8822      | O60258         |
| FGF-18              | Fibroblast growth factor 18                                     | FGF18         | 8817      | O76093         |
| FGF-19              | Fibroblast growth factor 19                                     | FGF19         | 9965      | O95750         |

|                          |                                                 |             |                |                        |
|--------------------------|-------------------------------------------------|-------------|----------------|------------------------|
| FGF-20                   | Fibroblast growth factor 20                     | FGF20       | 26281          | Q9NP95                 |
| FGF23                    | Fibroblast growth factor 23                     | FGF23       | 8074           | Q9GZV9                 |
| FGF-4                    | Fibroblast growth factor 4                      | FGF4        | 2249           | P08620                 |
| FGF-5                    | Fibroblast growth factor 5                      | FGF5        | 2250           | P12034                 |
| FGF-6                    | Fibroblast growth factor 6                      | FGF6        | 2251           | P10767                 |
| FGF7                     | Fibroblast growth factor 7                      | FGF7        | 2252           | P21781                 |
| FGF-8A                   | Fibroblast growth factor 8 isoform A            | FGF8        | 2253           | P55075                 |
| FGF-8B                   | Fibroblast growth factor 8 isoform B            | FGF8        | 2253           | P55075                 |
| FGF9                     | Fibroblast growth factor 9                      | FGF9        | 2254           | P31371                 |
| FGFR-2                   | Fibroblast growth factor receptor 2             | FGFR2       | 2263           | P21802                 |
| FGFR-3                   | Fibroblast growth factor receptor 3             | FGFR3       | 2261           | P22607                 |
| FGFR4                    | Fibroblast growth factor receptor 4             | FGFR4       | 2264           | P22455                 |
| FGR                      | Tyrosine-protein kinase Fgr                     | FGR         | 2268           | P09769                 |
| Fibrinogen               | Fibrinogen                                      | FGA FGB FGG | 2243 2244 2266 | P02671, P02675, P02679 |
| Fibrinogen g-chain dimer | Fibrinogen gamma chain                          | FGG         | 2266           | P02679                 |
| Fibronectin              | Fibronectin                                     | FN1         | 2335           | P02751                 |
| Ficolin-3                | Ficolin-3                                       | FCN3        | 8547           | O75636                 |
| FLRT1                    | Leucine-rich repeat transmembrane protein FLRT1 | FLRT1       | 23769          | Q9NZU1                 |
| Flt-3                    | Receptor-type tyrosine-protein kinase FLT3      | FLT3        | 2322           | P36888                 |
| Flt3 ligand              | Fms-related tyrosine kinase 3 ligand            | FLT3LG      | 2323           | P49771                 |
| FN1.3                    | Fibronectin Fragment 3                          | FN1         | 2335           | P02751                 |
| FN1.4                    | Fibronectin Fragment 4                          | FN1         | 2335           | P02751                 |
| Fractalkine/CX3CL-1      | Fractalkine                                     | CX3CL1      | 6376           | P78423                 |
| FSH                      | Follicle stimulating hormone                    | CGA FSHB    | 1081 2488      | P01215, P01225         |
| FST                      | Follistatin                                     | FST         | 10468          | P19883                 |
| FSTL3                    | Follistatin-related protein 3                   | FSTL3       | 10272          | O95633                 |
| Fucosyltransferase 3     | Galactoside 3(4)-L-fucosyltransferase           | FUT3        | 2525           | P21217                 |
| FUT5                     | Alpha-(1,3)-fucosyltransferase 5                | FUT5        | 2527           | Q11128                 |
| FYN                      | Tyrosine-protein kinase Fyn                     | FYN         | 2534           | P06241                 |
| GA733-1 protein          | Tumor-associated calcium signal transducer 2    | TACSTD2     | 4070           | P09758                 |
| Galectin-2               | Galectin-2                                      | LGALS2      | 3957           | P05162                 |
| Galectin-3               | Galectin-3                                      | LGALS3      | 3958           | P17931                 |
| Galectin-4               | Galectin-4                                      | LGALS4      | 3960           | P56470                 |

|                              |                                                      |          |        |        |
|------------------------------|------------------------------------------------------|----------|--------|--------|
| Galectin-8                   | Galectin-8                                           | LGALS8   | 3964   | O00214 |
| GAPDH, liver                 | Glyceraldehyde-3-phosphate dehydrogenase             | GAPDH    | 2597   | P04406 |
| GAS1                         | Growth arrest-specific protein 1                     | GAS1     | 2619   | P54826 |
| GCKR                         | Glucokinase regulatory protein                       | GCKR     | 2646   | Q14397 |
| GCP-2                        | C-X-C motif chemokine 6                              | CXCL6    | 6372   | P80162 |
| G-CSF                        | Granulocyte colony-stimulating factor                | CSF3     | 1440   | P09919 |
| G-CSF-R                      | Granulocyte colony-stimulating factor receptor       | CSF3R    | 1441   | Q99062 |
| GDF-11                       | Growth/differentiation factor 11                     | GDF11    | 10220  | O95390 |
| GDF2                         | Growth/differentiation factor 2                      | GDF2     | 2658   | Q9UK05 |
| GDF-9                        | Growth/differentiation factor 9                      | GDF9     | 2661   | O60383 |
| Gelsolin                     | Gelsolin                                             | GSN      | 2934   | P06396 |
| GFAP                         | Glial fibrillary acidic protein                      | GFAP     | 2670   | P14136 |
| GFRA-1                       | GDNF family receptor alpha-1                         | GFRA1    | 2674   | P56159 |
| GFRA-2                       | GDNF family receptor alpha-2                         | GFRA2    | 2675   | O00451 |
| GFRA-3                       | GDNF family receptor alpha-3                         | GFRA3    | 2676   | O60609 |
| GHC2                         | Mitochondrial glutamate carrier 2                    | SLC25A18 | 83733  | Q9H1K4 |
| GIB                          | Phospholipase A2                                     | PLA2G1B  | 5319   | P04054 |
| GIIE                         | Group IIE secretory phospholipase A2                 | PLA2G2E  | 30814  | Q9NZK7 |
| GITR                         | Tumor necrosis factor receptor superfamily member 18 | TNFRSF18 | 8784   | Q9Y5U5 |
| Glucagon                     | Glucagon                                             | GCG      | 2641   | P01275 |
| Glucocorticoid receptor      | Glucocorticoid receptor                              | NR3C1    | 2908   | P04150 |
| Glutamate carboxypeptidase   | Cytosolic non-specific dipeptidase                   | CNDP2    | 55748  | Q96KP4 |
| Glutathione S-transferase Pi | Glutathione S-transferase P                          | GSTP1    | 2950   | P09211 |
| Glypican 3                   | Glypican-3                                           | GPC3     | 2719   | P51654 |
| GM-CSF                       | Granulocyte-macrophage colony-stimulating factor     | CSF2     | 1437   | P04141 |
| GNS                          | N-acetylglucosamine-6-sulfatase                      | GNS      | 2799   | P15586 |
| GOT1                         | Aspartate aminotransferase, cytoplasmic              | GOT1     | 2805   | P17174 |
| GP114                        | Probable G-protein coupled receptor 114              | GPR114   | 221188 | Q8IZF4 |
| gp130, soluble               | Interleukin-6 receptor subunit beta                  | IL6ST    | 3572   | P40189 |



|                                |                                                    |              |           |                |
|--------------------------------|----------------------------------------------------|--------------|-----------|----------------|
| GP1BA                          | Platelet glycoprotein Ib alpha chain               | GP1BA        | 2811      | P07359         |
| GPC2                           | Glypican-2                                         | GPC2         | 221914    | Q8N158         |
| GPC5                           | Glypican-5                                         | GPC5         | 2262      | P78333         |
| gpIbIIIa                       | Integrin alpha-IIb: beta-3 complex                 | ITGA2B ITGB3 | 3674 3690 | P08514, P05106 |
| GNPMB                          | Transmembrane glycoprotein NMB                     | GNPMB        | 10457     | Q14956         |
| GPVI                           | Platelet glycoprotein VI                           | GP6          | 51206     | Q9HCN6         |
| Granulysin                     | Granulysin                                         | GNLY         | 10578     | P22749         |
| Granzyme A                     | Granzyme A                                         | GZMA         | 3001      | P12544         |
| Granzyme B                     | Granzyme B                                         | GZMB         | 3002      | P10144         |
| Granzyme H                     | Granzyme H                                         | GZMH         | 2999      | P20718         |
| GRB2-related adapter protein 2 | GRB2-related adapter protein 2                     | GRAP2        | 9402      | O75791         |
| GREM1                          | Gremlin-1                                          | GREM1        | 26585     | O60565         |
| GRN                            | Granulins                                          | GRN          | 2896      | P28799         |
| Gro-a                          | Growth-regulated alpha protein                     | CXCL1        | 2919      | P09341         |
| Gro-b/g                        | Gro-beta/gamma                                     | CXCL3 CXCL2  |           | P19876, P19875 |
| Growth hormone receptor        | Growth hormone receptor                            | GHR          | 2690      | P10912         |
| GSK-3 alpha/beta               | Glycogen synthase kinase-3 alpha/beta              | GSK3A GSK3B  | 2931 2932 | P49840, P49841 |
| GSTA3                          | Glutathione S-transferase A3                       | GSTA3        | 2940      | Q16772         |
| GV                             | Calcium-dependent phospholipase A2                 | PLA2G5       | 5322      | P39877         |
| GX                             | Group 10 secretory phospholipase A2                | PLA2G10      | 8399      | O15496         |
| H6ST1                          | Heparan-sulfate 6-O-sulfotransferase 1             | HS6ST1       | 9394      | O60243         |
| HAI-1                          | Kunitz-type protease inhibitor 1                   | SPINT1       | 6692      | O43278         |
| Haptoglobin, Mixed Type        | Haptoglobin                                        | HP           | 3240      | P00738         |
| Hat1                           | Histone acetyltransferase type B catalytic subunit | HAT1         | 8520      | O14929         |
| HB-EGF                         | Heparin-binding EGF-like growth factor             | HBEGF        | 1839      | Q99075         |
| HCC-1                          | C-C motif chemokine 14                             | CCL14        | 6358      | Q16627         |
| HCC-4                          | C-C motif chemokine 16                             | CCL16        | 6360      | O15467         |
| HCG                            | Human Chorionic Gonadotropin                       | CGA CGB      | 1081 1082 | P01215, P01233 |
| HCK                            | Tyrosine-protein kinase HCK                        | HCK          | 3055      | P08631         |
| HDAC8                          | Histone deacetylase 8                              | HDAC8        | 55869     | Q9BY41         |
| HDGR2                          | Hepatoma-derived growth factor-                    | HDGFRP2      | 84717     | Q7Z4V5         |

|                     |                                                 |                   |           |                |
|---------------------|-------------------------------------------------|-------------------|-----------|----------------|
|                     | related protein 2                               |                   |           |                |
| Hemoglobin          | Hemoglobin                                      | HBA1 HBB          | 3039 3043 | P69905, P68871 |
| Hemopexin           | Hemopexin                                       | HPX               | 3263      | P02790         |
| Heparin cofactor II | Heparin cofactor 2                              | SERPIND1          | 3053      | P05546         |
| HGF                 | Hepatocyte growth factor                        | HGF               | 3082      | P14210         |
| HGFA                | Hepatocyte growth factor activator              | HGFAC             | 3083      | Q04756         |
| HINT1               | Histidine triad nucleotide-binding protein 1    | HINT1             | 3094      | P49773         |
| HIPK3               | Homeodomain-interacting protein kinase 3        | HIPK3             | 10114     | Q9H422         |
| Histone H1.2        | Histone H1.2                                    | HIST1H1C          | 3006      | P16403         |
| Histone H2A.z       | Histone H2A.z                                   | H2AFZ             | 3015      | P0C0S5         |
| HIV-2 Rev           | Protein Rev_HV2BE                               | Human-virus       | 1724716   | P18093         |
| HMG-1               | High mobility group protein B1                  | HMGB1             | 3146      | P09429         |
| HMGR                | 3-hydroxy-3-methylglutaryl-coenzyme A reductase | HMGR              | 3156      | P04035         |
| HNRNP A/B           | Heterogeneous nuclear ribonucleoprotein A/B     | HNRNPAB           | 3182      | Q99729         |
| HNRNP A2/B1         | Heterogeneous nuclear ribonucleoproteins A2/B1  | HNRNPA2B1         | 3181      | P22626         |
| HNRNP K             | Heterogeneous nuclear ribonucleoprotein K       | HNRNPK            | 3190      | P61978         |
| HNRNPQ              | Heterogeneous nuclear ribonucleoprotein Q       | SYNCRIP           | 10492     | O60506         |
| HO-2                | Heme oxygenase 2                                | HMOX2             | 3163      | P30519         |
| HPG                 | 15-hydroxyprostaglandin dehydrogenase [NAD(+)]  | HPGD              | 3248      | P15428         |
| HPLN1               | Hyaluronan and proteoglycan link protein 1      | HAPLN1            | 1404      | P10915         |
| HPV E7 Type 16      | Protein E7_HP16                                 | Human-virus       | 1489079   | P03129         |
| HPV E7 Type18       | Protein E7_HP18                                 | Human-virus       | 1489089   | P06788         |
| HRG                 | Histidine-rich glycoprotein                     | HRG               | 3273      | P04196         |
| HSP 40              | DnaJ homolog subfamily B member 1               | DNAJB1            | 3337      | P25685         |
| HSP 60              | 60 kDa heat shock protein, mitochondrial        | HSPD1             | 3329      | P10809         |
| HSP 70              | Heat shock 70 kDa protein 1A/1B                 | HSPA1A            | 3303      | P08107         |
| HSP 90a/b           | Heat shock protein HSP 90-alpha/beta            | HSP90AA1 HSP90AB1 |           | P07900, P08238 |

|                 |                                                         |                |                 |        |
|-----------------|---------------------------------------------------------|----------------|-----------------|--------|
| HSP70 protein 8 | Heat shock cognate 71 kDa protein                       | HSPA8          | 3312            | P11142 |
| HTRA2           | Serine protease HTRA2,<br>mitochondrial                 | HTRA2          | 27429           | O43464 |
| HVEM            | Tumor necrosis factor receptor<br>superfamily member 14 | TNFRSF14       | 8764            | Q92956 |
| I-309           | C-C motif chemokine 1                                   | CCL1           | 6346            | P22362 |
| iC3b            | Complement C3b, inactivated                             | C3             | 718             | P01024 |
| ICOS            | Inducible T-cell costimulator                           | ICOS           | 29851           | Q9Y6W8 |
| IDE             | Insulin-degrading enzyme                                | IDE            | 3416            | P14735 |
| IDS             | Iduronate 2-sulfatase                                   | IDS            | 3423            | P22304 |
| IDUA            | alpha-L-iduronidase                                     | IDUA           | 3425            | P35475 |
| IF4A3           | Eukaryotic initiation factor 4A-III                     | EIF4A3         | 9775            | P38919 |
| IF4G2           | Eukaryotic translation initiation factor<br>4 gamma 2   | EIF4G2         | 1982            | P78344 |
| IFN-aA          | Interferon alpha-2                                      | IFNA2          | 3440            | P01563 |
| IFN-g           | Interferon gamma                                        | IFNG           | 3458            | P01579 |
| IFN-g R1        | Interferon gamma receptor 1                             | IFNGR1         | 3459            | P15260 |
| IFN-lambda 1    | Interferon lambda-1                                     | IFNL1          | 282618          | Q8IU54 |
| IFN-lambda 2    | Interferon lambda-2                                     | IFNL2          | 282616          | Q8IZJ0 |
| IgD             | Immunoglobulin D                                        | IGHD IGK@ IGL@ | 3495 50802 3535 | P01880 |
| IgE             | Immunoglobulin E                                        | IGHE IGK@ IGL@ | 3497 50802 3535 | P01854 |
| IGFBP-1         | Insulin-like growth factor-binding<br>protein 1         | IGFBP1         | 3484            | P08833 |
| IGFBP-2         | Insulin-like growth factor-binding<br>protein 2         | IGFBP2         | 3485            | P18065 |
| IGFBP-3         | Insulin-like growth factor-binding<br>protein 3         | IGFBP3         | 3486            | P17936 |
| IGFBP-4         | Insulin-like growth factor-binding<br>protein 4         | IGFBP4         | 3487            | P22692 |
| IGFBP-5         | Insulin-like growth factor-binding<br>protein 5         | IGFBP5         | 3488            | P24593 |
| IGFBP-6         | Insulin-like growth factor-binding<br>protein 6         | IGFBP6         | 3489            | P24592 |
| IGFBP-7         | Insulin-like growth factor-binding<br>protein 7         | IGFBP7         | 3490            | Q16270 |
| IGF-I           | Insulin-like growth factor I                            | IGF1           | 3479            | P05019 |
| IGF-I sR        | Insulin-like growth factor 1 receptor                   | IGF1R          | 3480            | P08069 |
| IGF-II receptor | Cation-independent mannose-6-                           | IGF2R          | 3482            | P11717 |

|            |                                                             |                                      |                                   |                |
|------------|-------------------------------------------------------------|--------------------------------------|-----------------------------------|----------------|
| IgG        | phosphate receptor<br>Immunoglobulin G                      | IGHG1 IGHG2 IGHG3<br>IGHG4 IGK@ IGL@ | 3500 3501 3502 3503<br>50802 3535 | P01857         |
| IgM        | Immunoglobulin M                                            | IGHM IGJ IGK@ IGL@                   | 3507 3512 50802<br>3535           | P01871         |
| IL-1 R AcP | Interleukin-1 Receptor accessory<br>protein                 | IL1RAP                               | 3556                              | Q9NPH3         |
| IL-1 R1    | Interleukin-1 receptor-like 1                               | IL1RL1                               | 9173                              | Q01638         |
| IL-1 sR9   | X-linked interleukin-1 receptor<br>accessory protein-like 2 | IL1RAPL2                             | 26280                             | Q9NP60         |
| IL-1 sRI   | Interleukin-1 receptor type 1                               | IL1R1                                | 3554                              | P14778         |
| IL-10      | Interleukin-10                                              | IL10                                 | 3586                              | P22301         |
| IL-10 Rb   | Interleukin-10 receptor subunit beta                        | IL10RB                               | 3588                              | Q08334         |
| IL-11      | Interleukin-11                                              | IL11                                 | 3589                              | P20809         |
| IL-11 RA   | Interleukin-11 receptor subunit alpha                       | IL11RA                               | 3590                              | Q14626         |
| IL-12      | Interleukin-12                                              | IL12A IL12B                          | 3592 3593                         | P29459, P29460 |
| IL-12 Rb1  | Interleukin-12 receptor subunit beta-<br>1                  | IL12RB1                              | 3594                              | P42701         |
| IL-12 RB2  | Interleukin-12 receptor subunit beta-<br>2                  | IL12RB2                              | 3595                              | Q99665         |
| IL-13      | Interleukin-13                                              | IL13                                 | 3596                              | P35225         |
| IL-13 Ra1  | Interleukin-13 receptor subunit<br>alpha-1                  | IL13RA1                              | 3597                              | P78552         |
| IL-15 Ra   | Interleukin-15 receptor subunit alpha                       | IL15RA                               | 3601                              | Q13261         |
| IL-16      | Interleukin-16                                              | IL16                                 | 3603                              | Q14005         |
| IL-17      | Interleukin-17A                                             | IL17A                                | 3605                              | Q16552         |
| IL-17 RC   | Interleukin-17 receptor C                                   | IL17RC                               | 84818                             | Q8NAC3         |
| IL-17 RD   | Interleukin-17 receptor D                                   | IL17RD                               | 54756                             | Q8NFM7         |
| IL-17 sR   | Interleukin-17 receptor A                                   | IL17RA                               | 23765                             | Q96F46         |
| IL-17B     | Interleukin-17B                                             | IL17B                                | 27190                             | Q9UHF5         |
| IL-17B R   | interleukin-17 receptor B                                   | IL17RB                               | 55540                             | Q9NRM6         |
| IL-17D     | Interleukin-17D                                             | IL17D                                | 53342                             | Q8TAD2         |
| IL-17E     | Interleukin-25                                              | IL25                                 | 64806                             | Q9H293         |
| IL-17F     | Interleukin-17F                                             | IL17F                                | 112744                            | Q96PD4         |
| IL-18 BPa  | Interleukin-18-binding protein                              | IL18BP                               | 10068                             | O95998         |
| IL-18 Ra   | Interleukin-18 receptor 1                                   | IL18R1                               | 8809                              | Q13478         |
| IL-18 Rb   | Interleukin-18 receptor accessory<br>protein                | IL18RAP                              | 8807                              | O95256         |

|          |                                                             |             |              |                |
|----------|-------------------------------------------------------------|-------------|--------------|----------------|
| IL-19    | Interleukin-19                                              | IL19        | 29949        | Q9UHD0         |
| IL-1a    | Interleukin-1 alpha                                         | IL1A        | 3552         | P01583         |
| IL-1b    | Interleukin-1 beta                                          | IL1B        | 3553         | P01584         |
| IL-1F7   | Interleukin-37                                              | IL37        | 27178        | Q9NZH6         |
| IL-1Rrp2 | Interleukin-1 receptor-like 2                               | IL1RL2      | 8808         | Q9HB29         |
| IL-2     | Interleukin-2                                               | IL2         | 3558         | P60568         |
| IL-2 sRa | Interleukin-2 receptor subunit alpha                        | IL2RA       | 3559         | P01589         |
| IL-2 sRg | Cytokine receptor common subunit gamma                      | IL2RG       | 3561         | P31785         |
| IL-20    | Interleukin-20                                              | IL20        | 50604        | Q9NYY1         |
| IL-20 Ra | Interleukin-20 receptor subunit alpha                       | IL20RA      | 53832        | Q9UHF4         |
| IL-22    | Interleukin-22                                              | IL22        | 50616        | Q9GZX6         |
| IL-22BP  | Interleukin-22 receptor subunit alpha-2                     | IL22RA2     | 116379       | Q969J5         |
| IL-22RA1 | Interleukin-22 receptor subunit alpha-1                     | IL22RA1     | 58985        | Q8N6P7         |
| IL-23    | Interleukin-23                                              | IL12B IL23A | 3593 51561   | P29460, Q9NPF7 |
| IL-23 R  | Interleukin-23 receptor                                     | IL23R       | 149233       | Q5VWK5         |
| IL-24    | Interleukin-24                                              | IL24        | 11009        | Q13007         |
| IL-27    | Interleukin-27                                              | IL27 EBI3   | 246778 10148 | Q8NEV9, Q14213 |
| IL-3     | Interleukin-3                                               | IL3         | 3562         | P08700         |
| IL-3 Ra  | Interleukin-3 receptor subunit alpha                        | IL3RA       | 3563         | P26951         |
| IL-34    | Interleukin-34                                              | IL34        | 146433       | Q6ZMJ4         |
| IL-4     | Interleukin-4                                               | IL4         | 3565         | P05112         |
| IL-4 sR  | Interleukin-4 receptor subunit alpha                        | IL4R        | 3566         | P24394         |
| IL-5     | Interleukin-5                                               | IL5         | 3567         | P05113         |
| IL-5 Ra  | Interleukin-5 receptor subunit alpha                        | IL5RA       | 3568         | Q01344         |
| IL-6     | Interleukin-6                                               | IL6         | 3569         | P05231         |
| IL-6 sRa | Interleukin-6 receptor subunit alpha                        | IL6R        | 3570         | P08887         |
| IL-7     | Interleukin-7                                               | IL7         | 3574         | P13232         |
| IL-7 Ra  | Interleukin-7 receptor subunit alpha                        | IL7R        | 3575         | P16871         |
| IL-8     | Interleukin-8                                               | CXCL8       | 3576         | P10145         |
| ILT-2    | Leukocyte immunoglobulin-like receptor subfamily B member 1 | LILRB1      | 10859        | Q8NHL6         |
| ILT-4    | Leukocyte immunoglobulin-like receptor subfamily B member 2 | LILRB2      | 10288        | Q8N423         |
| IMB1     | Importin subunit beta-1                                     | KPNB1       | 3837         | Q14974         |

|                    |                                               |             |           |                |
|--------------------|-----------------------------------------------|-------------|-----------|----------------|
| IMDH1              | Inosine-5'-monophosphate dehydrogenase 1      | IMPDH1      | 3614      | P20839         |
| IMDH2              | Inosine-5'-monophosphate dehydrogenase 2      | IMPDH2      | 3615      | P12268         |
| ING1               | Inhibitor of growth protein 1                 | ING1        | 3621      | Q9UK53         |
| Insulin            | Insulin                                       | INS         | 3630      | P01308         |
| Integrin a1b1      | Integrin alpha-I: beta-1 complex              | ITGA1 ITGB1 | 3672 3688 | P56199, P05556 |
| Integrin aVb5      | Integrin alpha-V: beta-5 complex              | ITGAV ITGB5 | 3685 3693 | P06756, P18084 |
| IP-10              | C-X-C motif chemokine 10                      | CXCL10      | 3627      | P02778         |
| IR                 | Insulin receptor                              | INSR        | 3643      | P06213         |
| I-TAC              | C-X-C motif chemokine 11                      | CXCL11      | 6373      | O14625         |
| ITI heavy chain H4 | Inter-alpha-trypsin inhibitor heavy chain H4  | ITIH4       | 3700      | Q14624         |
| JAG1               | Protein jagged-1                              | JAG1        | 182       | P78504         |
| JAG2               | Protein jagged-2                              | JAG2        | 3714      | Q9Y219         |
| JAK2               | Tyrosine-protein kinase JAK2                  | JAK2        | 3717      | O60674         |
| JAM-B              | Junctional adhesion molecule B                | JAM2        | 58494     | P57087         |
| JAM-C              | Junctional adhesion molecule C                | JAM3        | 83700     | Q9BX67         |
| JAML1              | Junctional adhesion molecule-like             | AMICA1      | 120425    | Q86YT9         |
| JNK2               | Mitogen-activated protein kinase 9            | MAPK9       | 5601      | P45984         |
| Kallikrein 11      | Kallikrein-11                                 | KLK11       | 11012     | Q9UBX7         |
| Kallikrein 12      | Kallikrein-12                                 | KLK12       | 43849     | Q9UKR0         |
| Kallikrein 13      | Kallikrein-13                                 | KLK13       | 26085     | Q9UKR3         |
| Kallikrein 14      | Kallikrein-14                                 | KLK14       | 43847     | Q9P0G3         |
| Kallikrein 4       | Kallikrein-4                                  | KLK4        | 9622      | Q9Y5K2         |
| Kallikrein 5       | Kallikrein-5                                  | KLK5        | 25818     | Q9Y337         |
| Kallikrein 6       | Kallikrein-6                                  | KLK6        | 5653      | Q92876         |
| Kallikrein 7       | Kallikrein-7                                  | KLK7        | 5650      | P49862         |
| Kallikrein 8       | Kallikrein-8                                  | KLK8        | 11202     | O60259         |
| Kallistatin        | Kallistatin                                   | SERPINA4    | 5267      | P29622         |
| Karyopherin-a2     | Importin subunit alpha-1                      | KPNA2       | 3838      | P52292         |
| Keratin 18         | Keratin, type I cytoskeletal 18               | KRT18       | 3875      | P05783         |
| KI2L4              | Killer cell immunoglobulin-like receptor 2DL4 | KIR2DL4     | 3805      | Q99706         |
| KI3L2              | Killer cell immunoglobulin-like receptor 3DL2 | KIR3DL2     | 3812      | P43630         |
| KI3S1              | Killer cell immunoglobulin-like               | KIR3DS1     | 3813      | Q14943         |

|                |                                                       |                   |                  |                        |
|----------------|-------------------------------------------------------|-------------------|------------------|------------------------|
|                | receptor 3DS1                                         |                   |                  |                        |
| KIF23          | Kinesin-like protein KIF23                            | KIF23             | 9493             | Q02241                 |
| Kininogen, HMW | Kininogen-1                                           | KNG1              | 3827             | P01042                 |
| KIRR3          | Kin of IRRE-like protein 3                            | KIRREL3           | 84623            | Q8IZU9                 |
| KLRF1          | Killer cell lectin-like receptor subfamily F member 1 | KLRF1             | 51348            | Q9NZS2                 |
| KPCI           | Protein kinase C iota type                            | PRKCI             | 5584             | P41743                 |
| KPCT           | Protein kinase C theta type                           | PRKCQ             | 5588             | Q04759                 |
| K-ras          | GTPase KRas                                           | KRAS              | 3845             | P01116                 |
| KREM2          | Kremen protein 2                                      | KREMEN2           | 79412            | Q8NCW0                 |
| Ku70           | X-ray repair cross-complementing protein 6            | XRCC6             | 2547             | P12956                 |
| KYNU           | Kynureninase                                          | KYNU              | 8942             | Q16719                 |
| Lactoferrin    | Lactotransferrin                                      | LTF               | 4057             | P02788                 |
| LAG-1          | C-C motif chemokine 4-like                            | CCL4L1            | 388372           | Q8NHW4                 |
| LAG-3          | Lymphocyte activation gene 3 protein                  | LAG3              | 3902             | P18627                 |
| Lamin-B1       | Lamin-B1                                              | LMNB1             | 4001             | P20700                 |
| Laminin        | Laminin                                               | LAMA1 LAMB1 LAMC1 | 284217 3912 3915 | P25391, P07942, P11047 |
| Layilin        | Layilin                                               | LAYN              | 143903           | Q6UX15                 |
| LBP            | Lipopolysaccharide-binding protein                    | LBP               | 3929             | P18428                 |
| LCK            | Tyrosine-protein kinase Lck                           | LCK               | 3932             | P06239                 |
| LCMT1          | Leucine carboxyl methyltransferase 1                  | LCMT1             | 51451            | Q9UIC8                 |
| LD78-beta      | C-C motif chemokine 3-like 1                          | CCL3L1            | 414062           | P16619                 |
| LDH-H 1        | L-lactate dehydrogenase B chain                       | LDHB              | 3945             | P07195                 |
| LEAP-1         | Hepcidin                                              | HAMP              | 57817            | P81172                 |
| Leptin         | Leptin                                                | LEP               | 3952             | P41159                 |
| LG3BP          | Galectin-3-binding protein                            | LGALS3BP          | 3959             | Q08380                 |
| LGMN           | Legumain                                              | LGMN              | 5641             | Q99538                 |
| LIF sR         | Leukemia inhibitory factor receptor                   | LIFR              | 3977             | P42702                 |
| LIGHT          | Tumor necrosis factor ligand superfamily member 14    | TNFSF14           | 8740             | O43557                 |
| LIMP II        | Lysosome membrane protein 2                           | SCARB2            | 950              | Q14108                 |
| LIN7B          | Protein lin-7 homolog B                               | LIN7B             | 64130            | Q9HAP6                 |
| Lipocalin 2    | Neutrophil gelatinase-associated lipocalin            | LCN2              | 3934             | P80188                 |

|                               |                                                                |          |           |                |
|-------------------------------|----------------------------------------------------------------|----------|-----------|----------------|
| Livin B                       | Baculoviral IAP repeat-containing protein 7 Isoform beta       | BIRC7    | 79444     | Q96CA5         |
| LKHA4                         | Leukotriene A-4 hydrolase                                      | LTA4H    | 4048      | P09960         |
| LRIG3                         | Leucine-rich repeats and immunoglobulin-like domains protein 3 | LRIG3    | 121227    | Q6UXM1         |
| LRP8                          | Low-density lipoprotein receptor-related protein 8             | LRP8     | 7804      | Q14114         |
| LRRT1                         | Leucine-rich repeat transmembrane neuronal protein 1           | LRRTM1   | 347730    | Q86UE6         |
| LRRT3                         | Leucine-rich repeat transmembrane neuronal protein 3           | LRRTM3   | 347731    | Q86VH5         |
| LSAMP                         | Limbic system-associated membrane protein                      | LSAMP    | 4045      | Q13449         |
| Luteinizing hormone           | Luteinizing hormone                                            | CGA LHB  | 1081 3972 | P01215, P01229 |
| LY86                          | Lymphocyte antigen 86                                          | LY86     | 9450      | O95711         |
| LY9                           | T-lymphocyte surface antigen Ly-9                              | LY9      | 4063      | Q9HBG7         |
| Lymphotactin                  | Lymphotactin                                                   | XCL1     | 6375      | P47992         |
| Lymphotoxin a1/b2             | Lymphotoxin alpha1:beta2                                       | LTA LTB  | 4049 4050 | P01374, Q06643 |
| Lymphotoxin a2/b1             | Lymphotoxin alpha2:beta1                                       | LTA LTB  | 4049 4050 | P01374, Q06643 |
| Lymphotoxin b R               | Tumor necrosis factor receptor superfamily member 3            | LTBR     | 4055      | P36941         |
| LYN                           | Tyrosine-protein kinase Lyn                                    | LYN      | 4067      | P07948         |
| LYNB                          | Tyrosine-protein kinase Lyn, isoform B                         | LYN      | 4067      | P07948         |
| Lysozyme                      | Lysozyme C                                                     | LYZ      | 4069      | P61626         |
| LYVE1                         | Lymphatic vessel endothelial hyaluronic acid receptor 1        | LYVE1    | 10894     | Q9Y5Y7         |
| M2-PK                         | Pyruvate kinase PKM                                            | PKM2     | 5315      | P14618         |
| Macrophage mannose receptor   | Macrophage mannose receptor 1                                  | MRC1     | 4360      | P22897         |
| Macrophage scavenger receptor | Macrophage scavenger receptor types I and II                   | MSR1     | 4481      | P21757         |
| Mammaglobin 2                 | Mammaglobin-B                                                  | SCGB2A1  | 4246      | O75556         |
| MAPK14                        | Mitogen-activated protein kinase 14                            | MAPK14   | 1432      | Q16539         |
| MAPK2                         | MAP kinase-activated protein kinase 2                          | MAPKAPK2 | 9261      | P49137         |
| MAPK5                         | MAP kinase-activated protein kinase 5                          | MAPKAPK5 | 8550      | Q8IW41         |



|            |                                                            |          |       |        |
|------------|------------------------------------------------------------|----------|-------|--------|
| MAPKAPK3   | MAP kinase-activated protein kinase 3                      | MAPKAPK3 | 7867  | Q16644 |
| Marapsin   | Serine protease 27                                         | PRSS27   | 83886 | Q9BQR3 |
| MASP3      | Mannan-binding lectin serine protease 1                    | MASP1    | 5648  | P48740 |
| MATK       | Megakaryocyte-associated tyrosine-protein kinase           | MATK     | 4145  | P42679 |
| MATN2      | Matrilin-2                                                 | MATN2    | 4147  | O00339 |
| MATN3      | Matrilin-3                                                 | MATN3    | 4148  | O15232 |
| MBD4       | Methyl-CpG-binding domain protein 4                        | MBD4     | 8930  | O95243 |
| MBL        | Mannose-binding protein C                                  | MBL2     | 4153  | P11226 |
| MCP-1      | C-C motif chemokine 2                                      | CCL2     | 6347  | P13500 |
| MCP-2      | C-C motif chemokine 8                                      | CCL8     | 6355  | P80075 |
| MCP-3      | C-C motif chemokine 7                                      | CCL7     | 6354  | P80098 |
| MCP-4      | C-C motif chemokine 13                                     | CCL13    | 6357  | Q99616 |
| M-CSF R    | Macrophage colony-stimulating factor 1 receptor            | CSF1R    | 1436  | P07333 |
| MDC        | C-C motif chemokine 22                                     | CCL22    | 6367  | O00626 |
| MDHC       | Malate dehydrogenase, cytoplasmic                          | MDH1     | 4190  | P40925 |
| MDM2       | E3 ubiquitin-protein ligase Mdm2                           | MDM2     | 4193  | Q00987 |
| MED-1      | Mediator of RNA polymerase II transcription subunit 1      | MED1     | 5469  | Q15648 |
| MEK1       | Dual specificity mitogen-activated protein kinase kinase 1 | MAP2K1   | 5604  | Q02750 |
| MEPE       | Matrix extracellular phosphoglycoprotein                   | MEPE     | 56955 | Q9NQ76 |
| Mesothelin | Mesothelin                                                 | MSLN     | 10232 | Q13421 |
| Met        | Hepatocyte growth factor receptor                          | MET      | 4233  | P08581 |
| METAP1     | Methionine aminopeptidase 1                                | METAP1   | 23173 | P53582 |
| MFGM       | Lactadherin                                                | MFGE8    | 4240  | Q08431 |
| MFRP       | Membrane frizzled-related protein                          | MFRP     | 83552 | Q9BY79 |
| MIA        | Melanoma-derived growth regulatory protein                 | MIA      | 8190  | Q16674 |
| MICA       | MHC class I polypeptide-related sequence A                 | MICA     | 4276  | Q29983 |
| MICB       | MHC class I polypeptide-related sequence B                 | MICB     | 4277  | Q29980 |

|         |                                                            |         |        |        |
|---------|------------------------------------------------------------|---------|--------|--------|
| Midkine | Midkine                                                    | MDK     | 4192   | P21741 |
| MIF     | Macrophage migration inhibitory factor                     | MIF     | 4282   | P14174 |
| MIP-1a  | C-C motif chemokine 3                                      | CCL3    | 6348   | P10147 |
| MIP-3a  | C-C motif chemokine 20                                     | CCL20   | 6364   | P78556 |
| MIP-3b  | C-C motif chemokine 19                                     | CCL19   | 6363   | Q99731 |
| MIP-5   | C-C motif chemokine 15                                     | CCL15   | 6359   | Q16663 |
| MIS     | Muellerian-inhibiting factor                               | AMH     | 268    | P03971 |
| MK01    | Mitogen-activated protein kinase 1                         | MAPK1   | 5594   | P28482 |
| MK08    | Mitogen-activated protein kinase 8                         | MAPK8   | 5599   | P45983 |
| MK11    | Mitogen-activated protein kinase 11                        | MAPK11  | 5600   | Q15759 |
| MK12    | Mitogen-activated protein kinase 12                        | MAPK12  | 6300   | P53778 |
| MK13    | Mitogen-activated protein kinase 13                        | MAPK13  | 5603   | O15264 |
| MMEL2   | Membrane metallo-endopeptidase-like 1                      | MMEL1   | 79258  | Q495T6 |
| MMP-1   | Interstitial collagenase                                   | MMP1    | 4312   | P03956 |
| MMP-10  | Stromelysin-2                                              | MMP10   | 4319   | P09238 |
| MMP-12  | Macrophage metalloelastase                                 | MMP12   | 4321   | P39900 |
| MMP-13  | Collagenase 3                                              | MMP13   | 4322   | P45452 |
| MMP-14  | Matrix metalloproteinase-14                                | MMP14   | 4323   | P50281 |
| MMP-16  | Matrix metalloproteinase-16                                | MMP16   | 4325   | P51512 |
| MMP-17  | Matrix metalloproteinase-17                                | MMP17   | 4326   | Q9ULZ9 |
| MMP-2   | 72 kDa type IV collagenase                                 | MMP2    | 4313   | P08253 |
| MMP-3   | Stromelysin-1                                              | MMP3    | 4314   | P08254 |
| MMP-7   | Matrilysin                                                 | MMP7    | 4316   | P09237 |
| MMP-8   | Neutrophil collagenase                                     | MMP8    | 4317   | P22894 |
| MMP-9   | Matrix metalloproteinase-9                                 | MMP9    | 4318   | P14780 |
| Mn SOD  | Superoxide dismutase [Mn], mitochondrial                   | SOD2    | 6648   | P04179 |
| MO2R1   | Cell surface glycoprotein CD200 receptor 1                 | CD200R1 | 131450 | Q8TD46 |
| Moesin  | Moesin                                                     | MSN     | 4478   | P26038 |
| MOZ     | Histone acetyltransferase KAT6A                            | KAT6A   | 7994   | Q92794 |
| MP2K2   | Dual specificity mitogen-activated protein kinase kinase 2 | MAP2K2  | 5605   | P36507 |
| MP2K4   | Dual specificity mitogen-activated protein kinase kinase 4 | MAP2K4  | 6416   | P45985 |

|                              |                                                         |          |        |        |
|------------------------------|---------------------------------------------------------|----------|--------|--------|
| MPIF-1                       | C-C motif chemokine 23                                  | CCL23    | 6368   | P55773 |
| MRC2                         | C-type mannose receptor 2                               | MRC2     | 9902   | Q9UBG0 |
| MRCKB                        | Serine/threonine-protein kinase<br>MRCK beta            | CDC42BPB | 9578   | Q9Y5S2 |
| MSP                          | Hepatocyte growth factor-like protein                   | MST1     | 4485   | P26927 |
| MSP R                        | Macrophage-stimulating protein<br>receptor              | MST1R    | 4486   | Q04912 |
| Myeloperoxidase              | Myeloperoxidase                                         | MPO      | 4353   | P05164 |
| Myoglobin                    | Myoglobin                                               | MB       | 4151   | P02144 |
| Myokinase, human             | Adenylate kinase isoenzyme 1                            | AK1      | 203    | P00568 |
| NACA                         | Nascent polypeptide-associated<br>complex subunit alpha | NACA     | 4666   | Q13765 |
| NADPH-P450<br>Oxidoreductase | NADPH--cytochrome P450<br>reductase                     | POR      | 5447   | P16435 |
| NAGK                         | N-acetyl-D-glucosamine kinase                           | NAGK     | 55577  | Q9UJ70 |
| NANOG                        | Homeobox protein NANOG                                  | NANOG    | 79923  | Q9H9S0 |
| NAP-2                        | Neutrophil-activating peptide 2                         | PPBP     | 5473   | P02775 |
| NCAM-120                     | Neural cell adhesion molecule 1, 120<br>kDa isoform     | NCAM1    | 4684   | P13591 |
| NCAM-L1                      | Neural cell adhesion molecule L1                        | L1CAM    | 3897   | P32004 |
| NCC27                        | Chloride intracellular channel protein<br>1             | CLIC1    | 1192   | O00299 |
| NCK1                         | Cytoplasmic protein NCK1                                | NCK1     | 4690   | P16333 |
| NDP kinase B                 | Nucleoside diphosphate kinase B                         | NME2     | 4831   | P22392 |
| Nectin-like protein 1        | Cell adhesion molecule 3                                | CADM3    | 57863  | Q8N126 |
| Nectin-like protein 2        | Cell adhesion molecule 1                                | CADM1    | 23705  | Q9BY67 |
| NET4                         | Netrin-4                                                | NTN4     | 59277  | Q9HB63 |
| Neurotrophin-3               | Neurotrophin-3                                          | NTF3     | 4908   | P20783 |
| Neurotrophin-5               | Neurotrophin-4                                          | NTF4     | 4909   | P34130 |
| NG36                         | Histone-lysine N-methyltransferase<br>EHMT2             | EHMT2    | 10919  | Q96KQ7 |
| NID2                         | Nidogen-2                                               | NID2     | 22795  | Q14112 |
| Nidogen                      | Nidogen-1                                               | NID1     | 4811   | P14543 |
| NKG2D                        | NKG2-D type II integral membrane<br>protein             | KLRK1    | 22914  | P26718 |
| NKp30                        | Natural cytotoxicity triggering<br>receptor 3           | NCR3     | 259197 | O14931 |
| NKp44                        | Natural cytotoxicity triggering                         | NCR2     | 9436   | O95944 |

|                                 |                                                          |           |       |        |
|---------------------------------|----------------------------------------------------------|-----------|-------|--------|
| NKp46                           | receptor 2<br>Natural cytotoxicity triggering receptor 1 | NCR1      | 9437  | O76036 |
| NLGNX                           | Neuroigin-4, X-linked                                    | NLGN4X    | 57502 | Q8N0W4 |
| NMT1                            | Glycylpeptide N-tetradecanoyltransferase 1               | NMT1      | 4836  | P30419 |
| Noggin                          | Noggin                                                   | NOG       | 9241  | Q13253 |
| Nogo Receptor                   | Reticulon-4 receptor                                     | RTN4R     | 65078 | Q9BZR6 |
| NOTC2                           | Neurogenic locus notch homolog protein 2                 | NOTCH2    | 4853  | Q04721 |
| Notch 1                         | Neurogenic locus notch homolog protein 1                 | NOTCH1    | 4851  | P46531 |
| Notch-3                         | Neurogenic locus notch homolog protein 3                 | NOTCH3    | 4854  | Q9UM47 |
| NovH                            | Protein NOV homolog                                      | NOV       | 4856  | P48745 |
| NPS-PLA2                        | Phospholipase A2, membrane associated                    | PLA2G2A   | 5320  | P14555 |
| NR1D1                           | Nuclear receptor subfamily 1 group D member 1            | NR1D1     | 9572  | P20393 |
| Nr-CAM                          | Neuronal cell adhesion molecule                          | NRCAM     | 4897  | Q92823 |
| NRP1                            | Neuropilin-1                                             | NRP1      | 8829  | O14786 |
| NRX1B                           | Neurexin-1-beta                                          | NRXN1     | 9378  | P58400 |
| NRX3B                           | Neurexin-3-beta                                          | NRXN3     | 9369  | Q9HDB5 |
| NSF1C                           | NSFL1 cofactor p47                                       | NSFL1C    | 55968 | Q9UNZ2 |
| Nucleoside diphosphate kinase A | Nucleoside diphosphate kinase A                          | NME1      | 4830  | P15531 |
| NUDC3                           | NudC domain-containing protein 3                         | NUDCD3    | 23386 | Q8IVD9 |
| NXPH1                           | Neurexophilin-1                                          | NXPH1     | 30010 | P58417 |
| OBCAM                           | Opioid-binding protein/cell adhesion molecule            | OPCML     | 4978  | Q14982 |
| OCAD1                           | OCIA domain-containing protein 1                         | OCIAD1    | 54940 | Q9NX40 |
| Olfactomedin-4                  | Olfactomedin-4                                           | OLFM4     | 10562 | Q6UX06 |
| OLR1                            | Oxidized low-density lipoprotein receptor 1              | OLR1      | 4973  | P78380 |
| OMD                             | Osteomodulin                                             | OMD       | 4958  | Q99983 |
| ON                              | SPARC                                                    | SPARC     | 6678  | P09486 |
| OPG                             | Tumor necrosis factor receptor superfamily member 11B    | TNFRSF11B | 4982  | O00300 |

|                    |                                                            |          |        |        |
|--------------------|------------------------------------------------------------|----------|--------|--------|
| OSM                | Oncostatin-M                                               | OSM      | 5008   | P13725 |
| OX2G               | OX-2 membrane glycoprotein                                 | CD200    | 4345   | P41217 |
| OX40 Ligand        | Tumor necrosis factor ligand superfamily member 4          | TNFSF4   | 7292   | P23510 |
| p27Kip1            | Cyclin-dependent kinase inhibitor 1B                       | CDKN1B   | 1027   | P46527 |
| PA2G4              | Proliferation-associated protein 2G4                       | PA2G4    | 5036   | Q9UQ80 |
| PACAP-27           | Pituitary adenylate cyclase-activating polypeptide 27      | ADCYAP1  | 116    | P18509 |
| PACAP-38           | Pituitary adenylate cyclase-activating polypeptide 38      | ADCYAP1  | 116    | P18509 |
| PAFAH              | Platelet-activating factor acetylhydrolase                 | PLA2G7   | 7941   | Q13093 |
| PAFAH beta subunit | Platelet-activating factor acetylhydrolase IB subunit beta | PAFAH1B2 | 5049   | P68402 |
| PAI-1              | Plasminogen activator inhibitor 1                          | SERPINE1 | 5054   | P05121 |
| PAK3               | Serine/threonine-protein kinase PAK 3                      | PAK3     | 5063   | O75914 |
| PAK6               | Serine/threonine-protein kinase PAK 6                      | PAK6     | 56924  | Q9NQ5  |
| PAK7               | Serine/threonine-protein kinase PAK 7                      | PAK7     | 57144  | Q9P286 |
| PAPP-A             | Pappalysin-1                                               | PAPPA    | 5069   | Q13219 |
| Paraoxonase 1      | Serum paraoxonase/arylesterase 1                           | PON1     | 5444   | P27169 |
| PARC               | C-C motif chemokine 18                                     | CCL18    | 6362   | P55774 |
| PARK7              | Protein DJ-1                                               | PARK7    | 11315  | Q99497 |
| PBEF               | Nicotinamide phosphoribosyltransferase                     | NAMPT    | 10135  | P43490 |
| P-Cadherin         | Cadherin-3                                                 | CDH3     | 1001   | P22223 |
| PCI                | Plasma serine protease inhibitor                           | SERPINA5 | 5104   | P05154 |
| PCNA               | Proliferating cell nuclear antigen                         | PCNA     | 5111   | P12004 |
| PCSK7              | Proprotein convertase subtilisin/kexin type 7              | PCSK7    | 9159   | Q16549 |
| PCSK9              | Proprotein convertase subtilisin/kexin type 9              | PCSK9    | 255738 | Q8NBP7 |
| PDE11              | Dual 3',5'-cyclic-AMP and -GMP phosphodiesterase 11A       | PDE11A   | 50940  | Q9HCR9 |
| PDE3A              | cGMP-inhibited 3',5'-cyclic phosphodiesterase A            | PDE3A    | 5139   | Q14432 |
| PDE4D              | cAMP-specific 3',5'-cyclic                                 | PDE4D    | 5144   | Q08499 |

|                         |                                                                                       |          |       |        |
|-------------------------|---------------------------------------------------------------------------------------|----------|-------|--------|
| PDE5A                   | phosphodiesterase 4D<br>cGMP-specific 3',5'-cyclic<br>phosphodiesterase               | PDE5A    | 8654  | O76074 |
| PDE7A                   | High affinity cAMP-specific 3',5'-<br>cyclic phosphodiesterase 7A                     | PDE7A    | 5150  | Q13946 |
| PDE9A                   | High affinity cGMP-specific 3',5'-<br>cyclic phosphodiesterase 9A                     | PDE9A    | 5152  | O76083 |
| PDGF Rb                 | Platelet-derived growth factor<br>receptor beta                                       | PDGFRB   | 5159  | P09619 |
| PDGF-AA                 | Platelet-derived growth factor<br>subunit A                                           | PDGFA    | 5154  | P04085 |
| PDGF-BB                 | Platelet-derived growth factor<br>subunit B                                           | PDGFB    | 5155  | P01127 |
| PDGF-CC                 | Platelet-derived growth factor C                                                      | PDGFC    | 56034 | Q9NRA1 |
| PDK1                    | [Pyruvate dehydrogenase (acetyl-<br>transferring)] kinase isozyme 1,<br>mitochondrial | PDK1     | 5163  | Q15118 |
| PD-L2                   | Programmed cell death 1 ligand 2                                                      | PDCD1LG2 | 80380 | Q9BQ51 |
| PDPK1                   | 3-phosphoinositide-dependent<br>protein kinase 1                                      | PDPK1    | 5170  | O15530 |
| PECAM-1                 | Platelet endothelial cell adhesion<br>molecule                                        | PECAM1   | 5175  | P16284 |
| Periostin               | Periostin                                                                             | POSTN    | 10631 | Q15063 |
| PERL                    | Lactoperoxidase                                                                       | LPO      | 4025  | P22079 |
| Peroxiredoxin-1         | Peroxiredoxin-1                                                                       | PRDX1    | 5052  | Q06830 |
| Peroxiredoxin-5         | Peroxiredoxin-5, mitochondrial                                                        | PRDX5    | 25824 | P30044 |
| Peroxiredoxin-6         | Peroxiredoxin-6                                                                       | PRDX6    | 9588  | P30041 |
| Persephin               | Persephin                                                                             | PSPN     | 5623  | O60542 |
| PESC                    | Pescadillo homolog                                                                    | PES1     | 23481 | O00541 |
| PF-4                    | Platelet factor 4                                                                     | PF4      | 5196  | P02776 |
| PFD5                    | Prefoldin subunit 5                                                                   | PFDN5    | 5204  | Q99471 |
| PGCB                    | Brevican core protein                                                                 | BCAN     | 63827 | Q96GW7 |
| PGP9.5                  | Ubiquitin carboxyl-terminal hydrolase<br>isozyme L1                                   | UCHL1    | 7345  | P09936 |
| PGRP-S                  | Peptidoglycan recognition protein 1                                                   | PGLYRP1  | 8993  | O75594 |
| PH                      | Pancreatic hormone                                                                    | PPY      | 5539  | P01298 |
| PHI                     | Glucose-6-phosphate isomerase                                                         | GPI      | 2821  | P06744 |
| Phosphoglycerate kinase | Phosphoglycerate kinase 1                                                             | PGK1     | 5230  | P00558 |

|   |                         |                                                                                                                                               |               |           |                |
|---|-------------------------|-----------------------------------------------------------------------------------------------------------------------------------------------|---------------|-----------|----------------|
| 1 | Phosphoglycerate mutase | Phosphoglycerate mutase 1                                                                                                                     | PGAM1         | 5223      | P18669         |
| 1 | PIGR                    | Polymeric immunoglobulin receptor                                                                                                             | PIGR          | 5284      | P01833         |
|   | PIK3CA/PIK3R1           | Phosphatidylinositol 4,5-bisphosphate 3-kinase catalytic subunit alpha isoform:Phosphatidylinositol 3-kinase regulatory subunit alpha complex | PIK3CA PIK3R1 | 5290 5295 | P42336, P27986 |
|   | PIM1                    | Serine/threonine-protein kinase pim-1                                                                                                         | PIM1          | 5292      | P11309         |
|   | PK3CG                   | Phosphatidylinositol 4,5-bisphosphate 3-kinase catalytic subunit gamma isoform                                                                | PIK3CG        | 5294      | P48736         |
|   | PKB a/b/g               | Protein kinase B alpha/beta/gamma                                                                                                             |               | 8413      | Family         |
|   | PKC-A                   | Protein kinase C alpha type                                                                                                                   | PRKCA         | 5578      | P17252         |
|   | PKC-B-II                | Protein kinase C beta type (splice variant beta-II)                                                                                           | PRKCB         | 5579      | P05771         |
|   | PKC-D                   | Protein kinase C delta type                                                                                                                   | PRKCD         | 5580      | Q05655         |
|   | PKC-G                   | Protein kinase C gamma type                                                                                                                   | PRKCG         | 5582      | P05129         |
|   | PKC-Z                   | Protein kinase C zeta type                                                                                                                    | PRKCZ         | 5590      | Q05513         |
|   | Plasmin                 | Plasmin                                                                                                                                       | PLG           | 5340      | P00747         |
|   | Plasminogen             | Plasminogen                                                                                                                                   | PLG           | 5340      | P00747         |
|   | PLCG1                   | 1-phosphatidylinositol 4,5-bisphosphate phosphodiesterase gamma-1                                                                             | PLCG1         | 5335      | P19174         |
|   | PIGF                    | Placenta growth factor                                                                                                                        | PGF           | 5228      | P49763         |
|   | PLK-1                   | Serine/threonine-protein kinase PLK1                                                                                                          | PLK1          | 5347      | P53350         |
|   | PLPP                    | Pyridoxal phosphate phosphatase                                                                                                               | PDXP          | 57026     | Q96GD0         |
|   | PLXC1                   | Plexin-C1                                                                                                                                     | PLXNC1        | 10154     | O60486         |
|   | PPAC                    | Low molecular weight phosphotyrosine protein phosphatase                                                                                      | ACP1          | 52        | P24666         |
|   | PPase                   | Inorganic pyrophosphatase                                                                                                                     | PPA1          | 5464      | Q15181         |
|   | PPIB                    | Peptidyl-prolyl cis-trans isomerase B                                                                                                         | PPIB          | 5479      | P23284         |
|   | PPID                    | Peptidyl-prolyl cis-trans isomerase D                                                                                                         | PPID          | 5481      | Q08752         |
|   | PPIE                    | Peptidyl-prolyl cis-trans isomerase E                                                                                                         | PPIE          | 10450     | Q9UNP9         |

|                                |                                                                                                      |          |       |        |
|--------------------------------|------------------------------------------------------------------------------------------------------|----------|-------|--------|
| Prekallikrein                  | Plasma kallikrein                                                                                    | KLKB1    | 3818  | P03952 |
| PRKACA                         | cAMP-dependent protein kinase catalytic subunit alpha                                                | PRKACA   | 5566  | P17612 |
| PRL                            | Prolactin                                                                                            | PRL      | 5617  | P01236 |
| Prolactin Receptor             | Prolactin receptor                                                                                   | PRLR     | 5618  | P16471 |
| Properdin                      | Properdin                                                                                            | CFP      | 5199  | P27918 |
| Prostatic binding protein      | Phosphatidylethanolamine-binding protein 1                                                           | PEBP1    | 5037  | P30086 |
| Protease nexin I               | Glia-derived nexin                                                                                   | SERPINE2 | 5270  | P07093 |
| Protein C                      | Vitamin K-dependent protein C                                                                        | PROC     | 5624  | P04070 |
| Protein disulfide isomerase A3 | Protein disulfide-isomerase A3                                                                       | PDIA3    | 2923  | P30101 |
| Protein disulfide-isomerase    | Protein disulfide-isomerase                                                                          | P4HB     | 5034  | P07237 |
| Protein S                      | Vitamin K-dependent protein S                                                                        | PROS1    | 5627  | P07225 |
| Proteinase-3                   | Myeloblastin                                                                                         | PRTN3    | 5657  | P24158 |
| Prothrombin                    | Prothrombin                                                                                          | F2       | 2147  | P00734 |
| PSA                            | Prostate-specific antigen                                                                            | KLK3     | 354   | P07288 |
| PSA1                           | Proteasome subunit alpha type-1                                                                      | PSMA1    | 5682  | P25786 |
| PSA2                           | Proteasome subunit alpha type-2                                                                      | PSMA2    | 5683  | P25787 |
| PSA6                           | Proteasome subunit alpha type-6                                                                      | PSMA6    | 5687  | P60900 |
| PSD7                           | 26S proteasome non-ATPase regulatory subunit 7                                                       | PSMD7    | 5713  | P51665 |
| P-Selectin                     | P-Selectin                                                                                           | SELP     | 6403  | P16109 |
| PSMA                           | Glutamate carboxypeptidase 2                                                                         | FOLH1    | 2346  | Q04609 |
| PSME1                          | Proteasome activator complex subunit 1                                                               | PSME1    | 5720  | Q06323 |
| PSME3                          | Proteasome activator complex subunit 3                                                               | PSME3    | 10197 | P61289 |
| PTEN                           | Phosphatidylinositol 3,4,5-trisphosphate 3-phosphatase and dual-specificity protein phosphatase PTEN | PTEN     | 5728  | P60484 |
| PTH                            | Parathyroid hormone                                                                                  | PTH      | 5741  | P01270 |
| PTHrP                          | Parathyroid hormone-related protein                                                                  | PTHrP    | 5744  | P12272 |
| PTK6                           | Protein-tyrosine kinase 6                                                                            | PTK6     | 5753  | Q13882 |
| PTN                            | Pleiotrophin                                                                                         | PTN      | 5764  | P21246 |
| PTP-1B                         | Tyrosine-protein phosphatase non-                                                                    | PTPN1    | 5770  | P18031 |



|                                      |                                                                     |           |        |        |
|--------------------------------------|---------------------------------------------------------------------|-----------|--------|--------|
| PTP-1C                               | receptor type 1<br>Tyrosine-protein phosphatase non-receptor type 6 | PTPN6     | 5777   | P29350 |
| PUR8                                 | Adenylosuccinate lyase                                              | ADSL      | 158    | P30566 |
| PYY                                  | Peptide YY                                                          | PYY       | 5697   | P10082 |
| Rab GDP dissociation inhibitor, beta | Rab GDP dissociation inhibitor beta                                 | GDI2      | 2665   | P50395 |
| RAC1                                 | Ras-related C3 botulinum toxin substrate 1                          | RAC1      | 5879   | P63000 |
| RAD51                                | DNA repair protein RAD51 homolog 1                                  | RAD51     | 5888   | Q06609 |
| RAN                                  | GTP-binding nuclear protein Ran                                     | RAN       | 5901   | P62826 |
| RANK                                 | Tumor necrosis factor receptor superfamily member 11A               | TNFRSF11A | 8792   | Q9Y6Q6 |
| RANTES                               | C-C motif chemokine 5                                               | CCL5      | 6352   | P13501 |
| RAP                                  | alpha-2-macroglobulin receptor-associated protein                   | LRPAP1    | 4043   | P30533 |
| RASA1                                | Ras GTPase-activating protein 1                                     | RASA1     | 5921   | P20936 |
| Rb                                   | Retinoblastoma-associated protein                                   | RB1       | 5925   | P06400 |
| RBM39                                | RNA-binding protein 39                                              | RBM39     | 9584   | Q14498 |
| RBP                                  | Retinol-binding protein 4                                           | RBP4      | 5950   | P02753 |
| RELT                                 | Tumor necrosis factor receptor superfamily member 19L               | RELT      | 84957  | Q969Z4 |
| Renin                                | Renin                                                               | REN       | 5972   | P00797 |
| Resistin                             | Resistin                                                            | RETN      | 56729  | Q9HD89 |
| RET                                  | Proto-oncogene tyrosine-protein kinase receptor Ret                 | RET       | 5979   | P07949 |
| RGMA                                 | Repulsive guidance molecule A                                       | RGMA      | 56963  | Q96B86 |
| RGMB                                 | RGM domain family member B                                          | RGMB      | 285704 | Q6NW40 |
| RGM-C                                | Hemojuvelin                                                         | HFE2      | 148738 | Q6ZVN8 |
| ROBO2                                | Roundabout homolog 2                                                | ROBO2     | 6092   | Q9HCK4 |
| ROBO3                                | Roundabout homolog 3                                                | ROBO3     | 64221  | Q96MS0 |
| ROR1                                 | Tyrosine-protein kinase transmembrane receptor ROR1                 | ROR1      | 4919   | Q01973 |
| RPS6KA3                              | Ribosomal protein S6 kinase alpha-3                                 | RPS6KA3   | 6197   | P51812 |
| RS3                                  | 40S ribosomal protein S3                                            | RPS3      | 6188   | P23396 |
| RS7                                  | 40S ribosomal protein S7                                            | RPS7      | 6201   | P62081 |
| RSK-like protein kinase              | Ribosomal protein S6 kinase alpha-5                                 | RPS6KA5   | 9252   | O75582 |

|               |                                                                        |         |        |        |
|---------------|------------------------------------------------------------------------|---------|--------|--------|
| RSPO2         | R-spondin-2                                                            | RSPO2   | 340419 | Q6UXX9 |
| RTN4          | Reticulon-4                                                            | RTN4    | 57142  | Q9NQC3 |
| RUXF          | Small nuclear ribonucleoprotein F                                      | SNRPF   | 6636   | P62306 |
| SAA           | Serum amyloid A-1 protein                                              | SAA1    | 6288   | P0DJI8 |
| SAP           | Serum amyloid P-component                                              | APCS    | 325    | P02743 |
| SARP-2        | Secreted frizzled-related protein 1                                    | SFRP1   | 6422   | Q8N474 |
| SBDS          | Ribosome maturation protein SBDS                                       | SBDS    | 51119  | Q9Y3A5 |
| SCD163        | Scavenger receptor cysteine-rich type 1 protein M130                   | CD163   | 9332   | Q86VB7 |
| sCD4          | T-cell surface glycoprotein CD4                                        | CD4     | 920    | P01730 |
| SCF sR        | Mast/stem cell growth factor receptor Kit                              | KIT     | 3815   | P10721 |
| SCGF-alpha    | Stem Cell Growth Factor-alpha                                          | CLEC11A | 6320   | Q9Y240 |
| SCGF-beta     | Stem Cell Growth Factor-beta                                           | CLEC11A | 6320   | Q9Y240 |
| SDF-1         | Stromal cell-derived factor 1                                          | CXCL12  | 6387   | P48061 |
| SE6L2         | Seizure 6-like protein 2                                               | SEZ6L2  | 26470  | Q6UXD5 |
| Secretin      | Secretin                                                               | SCT     | 6343   | P09683 |
| Semaphorin 3A | Semaphorin-3A                                                          | SEMA3A  | 10371  | Q14563 |
| Semaphorin 3E | Semaphorin-3E                                                          | SEMA3E  | 9723   | O15041 |
| Semaphorin-6A | Semaphorin-6A                                                          | SEMA6A  | 57556  | Q9H2E6 |
| SEPR          | Seprase                                                                | FAP     | 2191   | Q12884 |
| sE-Selectin   | E-Selectin                                                             | SELE    | 6401   | P16581 |
| SET           | Protein SET                                                            | SET     | 6418   | Q01105 |
| sFRP-3        | Secreted frizzled-related protein 3                                    | FRZB    | 2487   | Q92765 |
| SGTA          | Small glutamine-rich tetratricopeptide repeat-containing protein alpha | SGTA    | 6449   | O43765 |
| SH21A         | SH2 domain-containing protein 1A                                       | SH2D1A  | 4068   | O60880 |
| SHBG          | Sex hormone-binding globulin                                           | SHBG    | 6462   | P04278 |
| SHC1          | SHC-transforming protein 1                                             | SHC1    | 6464   | P29353 |
| SHP-2         | Tyrosine-protein phosphatase non-receptor type 11                      | PTPN11  | 5781   | Q06124 |
| Sialoadhesin  | Sialoadhesin                                                           | SIGLEC1 | 6614   | Q9BZZ2 |
| sICAM-1       | Intercellular adhesion molecule 1                                      | ICAM1   | 3383   | P05362 |
| sICAM-2       | Intercellular adhesion molecule 2                                      | ICAM2   | 3384   | P13598 |
| sICAM-3       | Intercellular adhesion molecule 3                                      | ICAM3   | 3385   | P32942 |
| sICAM-5       | Intercellular adhesion molecule 5                                      | ICAM5   | 7087   | Q9UMF0 |

|                      |                                                               |          |           |        |
|----------------------|---------------------------------------------------------------|----------|-----------|--------|
| SIG14                | Sialic acid-binding Ig-like lectin 14                         | SIGLEC14 | 100049587 | Q08ET2 |
| Siglec-3             | Myeloid cell surface antigen CD33                             | CD33     | 945       | P20138 |
| Siglec-6             | Sialic acid-binding Ig-like lectin 6                          | SIGLEC6  | 946       | O43699 |
| Siglec-7             | Sialic acid-binding Ig-like lectin 7                          | SIGLEC7  | 27036     | Q9Y286 |
| Siglec-9             | Sialic acid-binding Ig-like lectin 9                          | SIGLEC9  | 27180     | Q9Y336 |
| SIRT2                | NAD-dependent protein deacetylase sirtuin-2                   | SIRT2    | 22933     | Q8IXJ6 |
| SKP1                 | S-phase kinase-associated protein 1                           | SKP1     | 6500      | P63208 |
| SLAF5                | SLAM family member 5                                          | CD84     | 8832      | Q9UIB8 |
| SLAF6                | SLAM family member 6                                          | SLAMF6   | 114836    | Q96DU3 |
| SLAF7                | SLAM family member 7                                          | SLAMF7   | 57823     | Q9NQ25 |
| sLeptin R            | Leptin receptor                                               | LEPR     | 3953      | P48357 |
| SLIK5                | SLIT and NTRK-like protein 5                                  | SLITRK5  | 26050     | O94991 |
| SLPI                 | Antileukoproteinase                                           | SLPI     | 6590      | P03973 |
| sL-Selectin          | L-Selectin                                                    | SELL     | 6402      | P14151 |
| SMAC                 | Diablo homolog, mitochondrial                                 | DIABLO   | 56616     | Q9NR28 |
| SNAA                 | Alpha-soluble NSF attachment protein                          | NAPA     | 8775      | P54920 |
| SOD                  | Superoxide dismutase [Cu-Zn]                                  | SOD1     | 6647      | P00441 |
| Soggy-1              | Dickkopf-like protein 1                                       | DKKL1    | 27120     | Q9UK85 |
| Somatostatin-28      | Somatostatin-28                                               | SST      | 6750      | P61278 |
| Sonic Hedgehog       | Sonic hedgehog protein                                        | SHH      | 6469      | Q15465 |
| SORC2                | VPS10 domain-containing receptor SorCS2                       | SORCS2   | 57537     | Q96PQ0 |
| Sorting nexin 4      | Sorting nexin-4                                               | SNX4     | 8723      | O95219 |
| SPARCL1              | SPARC-like protein 1                                          | SPARCL1  | 8404      | Q14515 |
| SP-D                 | Pulmonary surfactant-associated protein D                     | SFTPD    | 6441      | P35247 |
| Sphingosine kinase 1 | Sphingosine kinase 1                                          | SPHK1    | 8877      | Q9NYA1 |
| SPHK2                | Sphingosine kinase 2                                          | SPHK2    | 56848     | Q9NRA0 |
| SPINT2               | Kunitz-type protease inhibitor 2                              | SPINT2   | 10653     | O43291 |
| Spondin-1            | Spondin-1                                                     | SPON1    | 10418     | Q9HCB6 |
| SPTA2                | Spectrin alpha chain, non-erythrocytic 1                      | SPTAN1   | 6709      | Q13813 |
| sRAGE                | Advanced glycosylation end product-specific receptor, soluble | AGER     | 177       | Q15109 |
| sRANKL               | Tumor necrosis factor ligand superfamily member 11            | TNFSF11  | 8600      | O14788 |

|                                 |                                                                                                                  |             |            |                |
|---------------------------------|------------------------------------------------------------------------------------------------------------------|-------------|------------|----------------|
| SRCN1                           | Proto-oncogene tyrosine-protein kinase Src                                                                       | SRC         | 6714       | P12931         |
| SREC-I                          | Scavenger receptor class F member 1                                                                              | SCARF1      | 8578       | Q14162         |
| SREC-II                         | Scavenger receptor class F member 2                                                                              | SCARF2      | 91179      | Q96GP6         |
| SSRP1                           | FACT complex subunit SSRP1                                                                                       | SSRP1       | 6749       | Q08945         |
| ST4S6                           | Carbohydrate sulfotransferase 15                                                                                 | CHST15      | 51363      | Q7LFX5         |
| STAB2                           | Stabilin-2                                                                                                       | STAB2       | 55576      | Q8WWQ8         |
| STC1                            | Stanniocalcin-1                                                                                                  | STC1        | 6781       | P52823         |
| sTie-1                          | Tyrosine-protein kinase receptor Tie-1, soluble                                                                  | TIE1        | 7075       | P35590         |
| sTie-2                          | Angiopoietin-1 receptor, soluble                                                                                 | TEK         | 7010       | Q02763         |
| STK16                           | Serine/threonine-protein kinase 16                                                                               | STK16       | 8576       | O75716         |
| STRATIFIN                       | 14-3-3 protein sigma                                                                                             | SFN         | 2810       | P31947         |
| Stress-induced-phosphoprotein 1 | Stress-induced-phosphoprotein 1                                                                                  | STIP1       | 10963      | P31948         |
| STX1a                           | Syntaxin-1A                                                                                                      | STX1A       | 6804       | Q16623         |
| SUPAR                           | Urokinase plasminogen activator surface receptor                                                                 | PLAUR       | 5329       | Q03405         |
| Survivin                        | Baculoviral IAP repeat-containing protein 5                                                                      | BIRC5       | 332        | O15392         |
| TACI                            | Tumor necrosis factor receptor superfamily member 13B                                                            | TNFRSF13B   | 23495      | O14836         |
| TAFI                            | Carboxypeptidase B2                                                                                              | CPB2        | 1361       | Q96IY4         |
| TAJ                             | Tumor necrosis factor receptor superfamily member 19                                                             | TNFRSF19    | 55504      | Q9NS68         |
| TAK1-TAB1                       | Mitogen-activated protein kinase kinase kinase 7:TGF-beta-activated kinase 1 and MAP3K7-binding protein 1 fusion | MAP3K7 TAB1 | 6885 10454 | O43318, Q15750 |
| TARC                            | C-C motif chemokine 17                                                                                           | CCL17       | 6361       | Q92583         |
| Tau                             | Microtubule-associated protein tau                                                                               | MAPT        | 4137       | P10636         |
| TBK1                            | Serine/threonine-protein kinase TBK1                                                                             | TBK1        | 29110      | Q9UHD2         |
| TBP                             | TATA-box-binding protein                                                                                         | TBP         | 6908       | P20226         |
| TCCR                            | Interleukin-27 receptor subunit alpha                                                                            | IL27RA      | 9466       | Q6UWB1         |
| TCPTP                           | Tyrosine-protein phosphatase non-receptor type 2                                                                 | PTPN2       | 5771       | P17706         |

|                            |                                                      |           |            |                |
|----------------------------|------------------------------------------------------|-----------|------------|----------------|
| TCTP                       | Translationally-controlled tumor protein             | TPT1      | 7178       | P13693         |
| TEC                        | Tyrosine-protein kinase Tec                          | TEC       | 7006       | P42680         |
| TECK                       | C-C motif chemokine 25                               | CCL25     | 6370       | O15444         |
| Tenascin                   | Tenascin                                             | TNC       | 3371       | P24821         |
| Testican-1                 | Testican-1                                           | SPOCK1    | 6695       | Q08629         |
| Testican-2                 | Testican-2                                           | SPOCK2    | 9806       | Q92563         |
| TF                         | Tissue Factor                                        | F3        | 2152       | P13726         |
| TFF3                       | Trefoil factor 3                                     | TFF3      | 7033       | Q07654         |
| TFPI                       | Tissue factor pathway inhibitor                      | TFPI      | 7035       | P10646         |
| TGF-b R II                 | TGF-beta receptor type-2                             | TGFBR2    | 7048       | P37173         |
| TGF-b R III                | Transforming growth factor beta receptor type 3      | TGFBR3    | 7049       | Q03167         |
| TGF-b1                     | Transforming growth factor beta-1                    | TGFB1     | 7040       | P01137         |
| TGF-b2                     | Transforming growth factor beta-2                    | TGFB2     | 7042       | P61812         |
| TGF-b3                     | Transforming growth factor beta-3                    | TGFB3     | 7043       | P10600         |
| TGM3                       | Protein-glutamine gamma-glutamyltransferase E        | TGM3      | 7053       | Q08188         |
| Thrombin                   | Thrombin                                             | F2        | 2147       | P00734         |
| Thrombopoietin Receptor    | Thrombopoietin Receptor                              | MPL       | 4352       | P40238         |
| Thrombospondin-1           | Thrombospondin-1                                     | THBS1     | 7057       | P07996         |
| Thymidine kinase           | Thymidine kinase, cytosolic                          | TK1       | 7083       | P04183         |
| Thyroglobulin              | Thyroglobulin                                        | TG        | 7038       | P01266         |
| Thyroxine-Binding Globulin | Thyroxine-Binding Globulin                           | SERPINA7  | 6906       | P05543         |
| TIG2                       | Retinoic acid receptor responder protein 2           | RARRES2   | 5919       | Q99969         |
| TIMD3                      | Hepatitis A virus cellular receptor 2                | HAVCR2    | 84868      | Q8TDQ0         |
| TIMP-1                     | Metalloproteinase inhibitor 1                        | TIMP1     | 7076       | P01033         |
| TIMP-2                     | Metalloproteinase inhibitor 2                        | TIMP2     | 7077       | P16035         |
| TIMP-3                     | Metalloproteinase inhibitor 3                        | TIMP3     | 7078       | P35625         |
| TLR2                       | Toll-like receptor 2                                 | TLR2      | 7097       | O60603         |
| TLR4:MD-2 complex          | Toll-like receptor 4:Lymphocyte antigen 96 complex   | TLR4 LY96 | 7099 23643 | O00206, Q9Y6Y9 |
| TMA                        | Thyroid peroxidase                                   | TPO       | 7173       | P07202         |
| TNF sR-I                   | Tumor necrosis factor receptor superfamily member 1A | TNFRSF1A  | 7132       | P19438         |
| TNF sR-II                  | Tumor necrosis factor receptor                       | TNFRSF1B  | 7133       | P20333         |

|                                          |                                                            |           |        |        |
|------------------------------------------|------------------------------------------------------------|-----------|--------|--------|
|                                          | superfamily member 1B                                      |           |        |        |
| TNF-a                                    | Tumor necrosis factor                                      | TNF       | 7124   | P01375 |
| TNF-b                                    | Lymphotoxin-alpha                                          | LTA       | 4049   | P01374 |
| TNFSF15                                  | Tumor necrosis factor ligand superfamily member 15         | TNFSF15   | 9966   | O95150 |
| TNFSF18                                  | Tumor necrosis factor ligand superfamily member 18         | TNFSF18   | 8995   | Q9UNG2 |
| TNR4                                     | Tumor necrosis factor receptor superfamily member 4        | TNFRSF4   | 7293   | P43489 |
| Topoisomerase I                          | DNA topoisomerase 1                                        | TOP1      | 7150   | P11387 |
| tPA                                      | Tissue-type plasminogen activator                          | PLAT      | 5327   | P00750 |
| TPSB2                                    | Tryptase beta-2                                            | TPSB2     | 64499  | P20231 |
| TPSG1                                    | Tryptase gamma                                             | TPSG1     | 25823  | Q9NRR2 |
| TRAIL R1                                 | Tumor necrosis factor receptor superfamily member 10A      | TNFRSF10A | 8797   | O00220 |
| Transcription factor MLR1, isoform CRA_b | Ligand-dependent nuclear receptor corepressor-like protein | LCORL     | 254251 | Q8N3X6 |
| Transferrin                              | Serotransferrin                                            | TF        | 7018   | P02787 |
| Transketolase                            | Transketolase                                              | TKT       | 7086   | P29401 |
| TrATPase                                 | Tartrate-resistant acid phosphatase type 5                 | ACP5      | 54     | P13686 |
| Triosephosphate isomerase                | Triosephosphate isomerase                                  | TPI1      | 7167   | P60174 |
| TrkA                                     | High affinity nerve growth factor receptor                 | NTRK1     | 4914   | P04629 |
| TrkB                                     | BDNF/NT-3 growth factors receptor                          | NTRK2     | 4915   | Q16620 |
| TrkC                                     | NT-3 growth factor receptor                                | NTRK3     | 4916   | Q16288 |
| Tropomyosin 1 alpha chain                | Tropomyosin alpha-1 chain                                  | TPM1      | 7168   | P09493 |
| Tropomyosin 2                            | Tropomyosin beta chain                                     | TPM2      | 7169   | P07951 |
| Troponin I                               | Troponin I, cardiac muscle                                 | TNNI3     | 7137   | P19429 |
| Troponin I, skeletal, fast twitch        | Troponin I, fast skeletal muscle                           | TNNI2     | 7136   | P48788 |
| TRY3                                     | Trypsin-3                                                  | PRSS3     | 5646   | P35030 |
| Trypsin                                  | Trypsin-1                                                  | PRSS1     | 5644   | P07477 |
| Trypsin 2                                | Trypsin-2                                                  | PRSS2     | 5645   | P07478 |
| TS                                       | Thymidylate synthase                                       | TYMS      | 7298   | P04818 |
| TSG-6                                    | Tumor necrosis factor-inducible gene                       | TNFAIP6   | 7130   | P98066 |

|                               |                                                       |           |            |                |
|-------------------------------|-------------------------------------------------------|-----------|------------|----------------|
|                               | 6 protein                                             |           |            |                |
| TSH                           | Thyroid Stimulating Hormone                           | CGA TSHB  | 1081 12372 | P01215, P01222 |
| TSLP                          | Thymic stromal lymphopietin                           | TSLP      | 85480      | Q969D9         |
| TSLP R                        | Cytokine receptor-like factor 2                       | CRLF2     | 64109      | Q9HC73         |
| TSP2                          | Thrombospondin-2                                      | THBS2     | 7058       | P35442         |
| TSP4                          | Thrombospondin-4                                      | THBS4     | 7060       | P35443         |
| TWEAK                         | Tumor necrosis factor ligand superfamily member 12    | TNFSF12   | 8742       | O43508         |
| TWEAKR                        | Tumor necrosis factor receptor superfamily member 12A | TNFRSF12A | 51330      | Q9NP84         |
| TXD12                         | Thioredoxin domain-containing protein 12              | TXNDC12   | 51060      | O95881         |
| TYK2                          | Non-receptor tyrosine-protein kinase TYK2             | TYK2      | 7297       | P29597         |
| UB2L3                         | Ubiquitin-conjugating enzyme E2 L3                    | UBE2L3    | 7332       | P68036         |
| UBC9                          | SUMO-conjugating enzyme UBC9                          | UBE2I     | 7329       | P63279         |
| UBE2N                         | Ubiquitin-conjugating enzyme E2 N                     | UBE2N     | 7334       | P61088         |
| Ubiquitin                     | Ubiquitin                                             | RPS27A    | 6233       | P62979         |
| Ubiquitin+1                   | Ubiquitin+1, truncated mutation for UbB               | RPS27A    | 6233       | P62979         |
| UFC1                          | Ubiquitin-fold modifier-conjugating enzyme 1          | UFC1      | 51506      | Q9Y3C8         |
| UFM1                          | Ubiquitin-fold modifier 1                             | UFM1      | 51569      | P61960         |
| ULBP-1                        | NKG2D ligand 1                                        | ULBP1     | 80329      | Q9BZM6         |
| ULBP-2                        | NKG2D ligand 2                                        | ULBP2     | 80328      | Q9BZM5         |
| ULBP-3                        | NKG2D ligand 3                                        | ULBP3     | 79465      | Q9BZM4         |
| UNC5H3                        | Netrin receptor UNC5C                                 | UNC5C     | 8633       | O95185         |
| UNC5H4                        | Netrin receptor UNC5D                                 | UNC5D     | 137970     | Q6UXZ4         |
| uPA                           | Urokinase-type plasminogen activator                  | PLAU      | 5328       | P00749         |
| URB                           | Coiled-coil domain-containing protein 80              | CCDC80    | 151887     | Q76M96         |
| Vasoactive Intestinal Peptide | Vasoactive Intestinal Peptide                         | VIP       | 7432       | P01282         |
| VCAM-1                        | Vascular cell adhesion protein 1                      | VCAM1     | 7412       | P19320         |
| VEGF                          | Vascular endothelial growth factor A                  | VEGFA     | 7422       | P15692         |
| VEGF sR2                      | Vascular endothelial growth factor receptor 2         | KDR       | 3791       | P35968         |

|          |                                                                        |         |        |        |
|----------|------------------------------------------------------------------------|---------|--------|--------|
| VEGF sR3 | Vascular endothelial growth factor receptor 3                          | FLT4    | 2324   | P35916 |
| VEGF121  | Vascular endothelial growth factor A, isoform 121                      | VEGFA   | 7422   | P15692 |
| VEGF-C   | Vascular endothelial growth factor C                                   | VEGFC   | 7424   | P49767 |
| vWF      | von Willebrand factor                                                  | VWF     | 7450   | P04275 |
| WFKN1    | WAP, kazal, immunoglobulin, kunitz and NTR domain-containing protein 1 | WFIKKN1 | 117166 | Q96NZ8 |
| WFKN2    | WAP, Kazal, immunoglobulin, Kunitz and NTR domain-containing protein 2 | WFIKKN2 | 124857 | Q8TEU8 |
| WIF-1    | Wnt inhibitory factor 1                                                | WIF1    | 11197  | Q9Y5W5 |
| WISP-1   | WNT1-inducible-signaling pathway protein 1                             | WISP1   | 8840   | O95388 |
| WNT7A    | Protein Wnt-7a                                                         | WNT7A   | 7476   | O00755 |
| XEDAR    | Tumor necrosis factor receptor superfamily member 27                   | EDA2R   | 60401  | Q9HAV5 |
| XPNPEP1  | Xaa-Pro aminopeptidase 1                                               | XPNPEP1 | 7511   | Q9NQW7 |
| XTP3A    | dCTP pyrophosphatase 1                                                 | DCTPP1  | 79077  | Q9H773 |
| YES      | Tyrosine-protein kinase Yes                                            | YES1    | 7525   | P07947 |
| ZAP70    | Tyrosine-protein kinase ZAP-70                                         | ZAP70   | 7535   | P43403 |



**Supplemental Table 2. Baseline clinical characteristics of PMI study cohorts**

|                                             | <b>PMI<br/>Derivation<br/>N=15</b> | <b>PMI<br/>Validation<br/>N=15</b> | <b>SMI<br/>Cases<br/>N= 23</b> | <b>SMI<br/>Control<br/>N=23</b> |
|---------------------------------------------|------------------------------------|------------------------------------|--------------------------------|---------------------------------|
| <b>Age (yr)</b>                             | 65 ± 10                            | 62 ± 10                            | 60 ± 12                        | 60 ± 12                         |
| <b>Female (%)</b>                           | 53                                 | 27                                 | 22                             | 26                              |
| <b>White (%)</b>                            | 93                                 | 93                                 | 87                             | 94                              |
| <b>Creatinine baseline (mg/dl)</b>          | 0.96 ± 0.22                        | 1.13 ± 0.36                        | 1.00 ± 0.45                    | 0.97 ± 0.16                     |
| <b>Peak troponin T (ng/ml)</b>              | 2.4 ± 1.3                          | 3.4 ± 1.7                          | 6.0 ± 6.2                      | NA                              |
| <b>Peak CK-MB (ng/ml)</b>                   | 120 ± 79                           | 145 ± 68                           | 151 ± 116                      | NA                              |
| <b>Peak CK (U/l)</b>                        | 1126 ± 611                         | 997 ± 351                          | 1476 ± 1213                    | NA                              |
| <b>Total cholesterol (mg/dl)</b>            | 188 ± 46                           | 142 ± 14*                          | NA                             | 186 ± 36                        |
| <b>Aspirin exposure (%)</b>                 | 46                                 | 83                                 | 100                            | 48***                           |
| <b>Beta-blocker exposure (%)</b>            | 87                                 | 93                                 | 97                             | 26                              |
| <b>Calcium channel blocker exposure (%)</b> | 53                                 | 58                                 | 4.3                            | 35                              |
| <b>Statin exposure (%)</b>                  | 60                                 | 86                                 | 96                             | 43                              |

Continuous variable are mean ± SD; categorical variables are shown as percentages. \*  $P < 0.05$  PMI derivation vs. validation or SMI cases vs. controls. \*\*\*  $P < 0.0001$  versus PMI derivation vs. validation or SMI cases vs. controls.  $P$  calculated by Student's t-test for continuous variables and Fisher's Exact test for categorical values.

**Supplemental Table 3. Proteins changed after heparin administration during cardiac catheterization**

| <b>Protein</b>                    | <b><i>P</i></b> |
|-----------------------------------|-----------------|
| <b>40S ribosomal protein SA</b>   | 4.93E-03        |
| <b>6Ckine</b>                     | 9.18E-03        |
| <b>a2-Macroglobulin</b>           | 6.93E-03        |
| <b>ABL2</b>                       | 2.88E-02        |
| <b>Activin A</b>                  | 4.12E-02        |
| <b>Alkaline phosphatase, bone</b> | 9.59E-03        |
| <b>Aminoacylase-1</b>             | 8.59E-03        |
| <b>ANP</b>                        | 1.83E-02        |
| <b>ANGL3</b>                      | 2.93E-02        |
| <b>ANGL4</b>                      | 5.82E-04        |
| <b>Apo A-I</b>                    | 3.13E-03        |
| <b>Apo B</b>                      | 1.08E-06        |
| <b>Apo E</b>                      | 8.87E-07        |
| <b>Apo E2</b>                     | 2.57E-02        |
| <b>Apo E3</b>                     | 5.54E-04        |
| <b>Apo E4</b>                     | 1.97E-04        |
| <b>ARMEL</b>                      | 3.53E-02        |
| <b>ART</b>                        | 5.73E-05        |
| <b>ARTS1</b>                      | 2.51E-02        |
| <b>ASAH2</b>                      | 2.21E-02        |
| <b>ASAHL</b>                      | 2.89E-02        |
| <b>ATP synthase beta chain</b>    | 2.18E-02        |
| <b>b-NGF</b>                      | 3.92E-02        |
| <b>BAFF</b>                       | 3.50E-02        |
| <b>BCAR3</b>                      | 2.16E-02        |
| <b>BDNF</b>                       | 4.34E-02        |
| <b>bFGF</b>                       | 8.10E-03        |
| <b>BFL1</b>                       | 4.13E-03        |
| <b>BGN</b>                        | 7.54E-04        |
| <b>BMP-14</b>                     | 3.11E-02        |
| <b>BMP-6</b>                      | 3.06E-02        |
| <b>BMP-7</b>                      | 2.65E-02        |
| <b>BMPR2</b>                      | 2.67E-02        |
| <b>BMP-10</b>                     | 1.28E-03        |
| <b>Bone proteoglycan II</b>       | 1.33E-03        |
| <b>BSP</b>                        | 2.48E-03        |
| <b>C1QBP</b>                      | 2.11E-02        |

|                                    |          |
|------------------------------------|----------|
| <b>C3a</b>                         | 3.00E-02 |
| <b>C3b</b>                         | 4.97E-02 |
| <b>C4</b>                          | 2.92E-02 |
| <b>C5a</b>                         | 2.67E-03 |
| <b>CAD15</b>                       | 1.26E-04 |
| <b>Calreticulin</b>                | 1.94E-02 |
| <b>CAMK1D</b>                      | 7.20E-03 |
| <b>Carbonic anhydrase III</b>      | 4.85E-02 |
| <b>Caspase-2</b>                   | 3.06E-02 |
| <b>Catalase</b>                    | 3.53E-02 |
| <b>Cathepsin B</b>                 | 1.59E-02 |
| <b>CCL28</b>                       | 1.74E-04 |
| <b>CD226</b>                       | 3.49E-02 |
| <b>CD30</b>                        | 6.59E-03 |
| <b>CD36 ANTIGEN</b>                | 2.03E-02 |
| <b>CFC1</b>                        | 3.14E-02 |
| <b>CK2-A1:B</b>                    | 4.32E-02 |
| <b>CKAP2</b>                       | 1.23E-02 |
| <b>CLC7A</b>                       | 4.70E-04 |
| <b>Coactosin-like protein</b>      | 4.04E-02 |
| <b>Coagulation Factor IXab</b>     | 2.43E-02 |
| <b>Coagulation Factor V</b>        | 8.72E-03 |
| <b>COLEC12</b>                     | 4.17E-03 |
| <b>CTGF</b>                        | 1.72E-02 |
| <b>CTLA-4</b>                      | 1.69E-02 |
| <b>Cystatin M</b>                  | 6.08E-03 |
| <b>CYTD</b>                        | 1.71E-02 |
| <b>Cytochrome c</b>                | 3.97E-02 |
| <b>Cytochrome P450 3A4</b>         | 5.19E-04 |
| <b>DAN</b>                         | 1.99E-02 |
| <b>DC-SIGN</b>                     | 1.69E-02 |
| <b>DC-SIGNR</b>                    | 6.69E-03 |
| <b>Discoidin domain receptor 1</b> | 4.80E-02 |
| <b>Discoidin domain receptor 2</b> | 3.85E-03 |
| <b>DKK3</b>                        | 1.58E-02 |
| <b>DnaJ homolog</b>                | 9.99E-03 |
| <b>DPP2</b>                        | 2.67E-02 |
| <b>DR6</b>                         | 4.90E-02 |
| <b>DSC3</b>                        | 2.42E-02 |
| <b>Dynactin subunit 2</b>          | 3.79E-03 |
| <b>EDA</b>                         | 7.95E-04 |
| <b>Elafin</b>                      | 4.15E-02 |
| <b>Elastase</b>                    | 3.03E-02 |

|                                       |          |
|---------------------------------------|----------|
| <b>EMR2</b>                           | 4.64E-02 |
| <b>Endocan</b>                        | 3.66E-03 |
| <b>ENTP5</b>                          | 1.67E-02 |
| <b>Eotaxin</b>                        | 3.33E-02 |
| <b>EP15R</b>                          | 4.63E-03 |
| <b>Ephrin-A4</b>                      | 4.43E-02 |
| <b>Ephrin-B3</b>                      | 2.83E-02 |
| <b>ER</b>                             | 2.21E-02 |
| <b>FAM107B</b>                        | 1.29E-02 |
| <b>Fas ligand, soluble</b>            | 1.08E-02 |
| <b>FCGR1</b>                          | 4.54E-04 |
| <b>FCN1</b>                           | 4.96E-03 |
| <b>FCN2</b>                           | 6.87E-06 |
| <b>FGF-17</b>                         | 3.03E-03 |
| <b>FGF7</b>                           | 8.36E-04 |
| <b>FGFR-3</b>                         | 2.51E-02 |
| <b>Ficolin-3</b>                      | 6.09E-03 |
| <b>Flt3 ligand</b>                    | 4.61E-02 |
| <b>FST</b>                            | 7.20E-03 |
| <b>G-CSF</b>                          | 4.24E-02 |
| <b>G-CSF-R</b>                        | 3.48E-02 |
| <b>GCKR</b>                           | 1.67E-02 |
| <b>GCP-2</b>                          | 1.59E-02 |
| <b>GFAP</b>                           | 2.93E-02 |
| <b>GFRa-1</b>                         | 6.22E-04 |
| <b>GHC2</b>                           | 3.84E-02 |
| <b>GITR</b>                           | 4.39E-02 |
| <b>Glucagon</b>                       | 1.32E-03 |
| <b>Glypican 3</b>                     | 1.31E-03 |
| <b>GM-CSF</b>                         | 2.72E-02 |
| <b>GOT1</b>                           | 5.12E-03 |
| <b>Granulysin</b>                     | 1.85E-02 |
| <b>GRB2-related adapter protein 2</b> | 2.81E-03 |
| <b>HAI-1</b>                          | 1.13E-02 |
| <b>HAT1</b>                           | 2.22E-02 |
| <b>HCG</b>                            | 3.28E-02 |
| <b>HGF</b>                            | 7.55E-04 |
| <b>HPG</b>                            | 3.45E-04 |
| <b>HSP 70</b>                         | 6.02E-05 |
| <b>iC3b</b>                           | 2.72E-02 |
| <b>IDUA</b>                           | 3.06E-02 |
| <b>IF4A3</b>                          | 1.49E-02 |
| <b>IFN-aA</b>                         | 4.43E-02 |

|                                      |          |
|--------------------------------------|----------|
| <b>IL-1 sR9</b>                      | 4.18E-02 |
| <b>IL-12</b>                         | 4.88E-03 |
| <b>IL-13 Ra1</b>                     | 1.22E-02 |
| <b>IL-17B</b>                        | 8.27E-04 |
| <b>IL-17F</b>                        | 2.95E-02 |
| <b>IL-19</b>                         | 2.89E-02 |
| <b>IL-2</b>                          | 2.75E-04 |
| <b>IL-20</b>                         | 3.82E-02 |
| <b>IL-3</b>                          | 1.00E-02 |
| <b>IL-4 sR</b>                       | 3.55E-02 |
| <b>IL-5 Ra</b>                       | 3.20E-02 |
| <b>IL-6 sRa</b>                      | 7.82E-03 |
| <b>IL-7 Ra</b>                       | 3.24E-02 |
| <b>IL-22 Ra1</b>                     | 6.26E-03 |
| <b>ILT-4</b>                         | 2.53E-02 |
| <b>Insulin</b>                       | 2.70E-02 |
| <b>Integrin aVb5</b>                 | 8.72E-04 |
| <b>kallikrein 5</b>                  | 4.45E-03 |
| <b>Karyopherin-a2</b>                | 1.63E-02 |
| <b>KLRF1</b>                         | 2.90E-02 |
| <b>KYNU</b>                          | 2.94E-02 |
| <b>Lactoferrin</b>                   | 7.89E-03 |
| <b>LAG-3</b>                         | 4.91E-03 |
| <b>LCMT1</b>                         | 1.22E-02 |
| <b>LD78-beta</b>                     | 1.16E-03 |
| <b>Leptin</b>                        | 3.63E-02 |
| <b>LG3BP</b>                         | 2.42E-02 |
| <b>LKHA4</b>                         | 2.17E-02 |
| <b>LRP8</b>                          | 2.34E-02 |
| <b>LSAMP</b>                         | 3.49E-02 |
| <b>LY86</b>                          | 2.46E-03 |
| <b>LY9</b>                           | 4.33E-02 |
| <b>Macrophage scavenger receptor</b> | 4.61E-02 |
| <b>MFGM</b>                          | 9.16E-04 |
| <b>Midkine</b>                       | 4.96E-04 |
| <b>MIP-1a</b>                        | 9.09E-03 |
| <b>MIP-3b</b>                        | 2.05E-02 |
| <b>MK11</b>                          | 4.38E-02 |
| <b>MK12</b>                          | 1.61E-02 |
| <b>MMEL2</b>                         | 3.88E-03 |
| <b>MMP-17</b>                        | 2.58E-02 |
| <b>MMP-9</b>                         | 1.41E-02 |
| <b>MO2R1</b>                         | 3.43E-02 |

---

|                                    |          |
|------------------------------------|----------|
| <b>Moesin</b>                      | 3.64E-02 |
| <b>MOZ</b>                         | 4.65E-03 |
| <b>MP2K2</b>                       | 1.05E-02 |
| <b>MRCKB</b>                       | 6.89E-03 |
| <b>Myeloperoxidase</b>             | 3.72E-02 |
| <b>NADPH-P450 Oxidoreductase</b>   | 2.29E-04 |
| <b>NCK1</b>                        | 1.79E-02 |
| <b>Nectin-like protein 1</b>       | 4.59E-02 |
| <b>Nectin-like protein 2</b>       | 1.93E-02 |
| <b>NG36</b>                        | 4.79E-03 |
| <b>NID2</b>                        | 3.13E-02 |
| <b>NOTC2</b>                       | 1.68E-02 |
| <b>NovH</b>                        | 4.69E-02 |
| <b>NRX1B</b>                       | 9.95E-03 |
| <b>NUDC3</b>                       | 3.40E-03 |
| <b>OCAD1</b>                       | 2.69E-03 |
| <b>OX2G</b>                        | 5.38E-03 |
| <b>PBEF</b>                        | 3.44E-02 |
| <b>PCSK7</b>                       | 8.12E-03 |
| <b>PDE11</b>                       | 2.76E-02 |
| <b>PDE4D</b>                       | 4.57E-02 |
| <b>PECAM-1</b>                     | 2.18E-02 |
| <b>PERL</b>                        | 3.30E-02 |
| <b>Peroxiredoxin-5</b>             | 3.22E-02 |
| <b>PF-4</b>                        | 2.80E-03 |
| <b>PGP9.5</b>                      | 8.25E-03 |
| <b>PGRP-S</b>                      | 2.65E-02 |
| <b>PIK3CA/PIK3R1</b>               | 2.98E-02 |
| <b>PKC-D</b>                       | 3.34E-02 |
| <b>PKC-G</b>                       | 1.38E-02 |
| <b>PKC-Z</b>                       | 2.55E-02 |
| <b>PIGF</b>                        | 2.45E-03 |
| <b>Properdin</b>                   | 9.97E-03 |
| <b>Protein disulfide-isomerase</b> | 2.90E-03 |
| <b>Protease nexin 1</b>            | 2.15E-03 |
| <b>PSA1</b>                        | 1.45E-02 |
| <b>PSA2</b>                        | 1.87E-02 |
| <b>PSME1</b>                       | 3.60E-02 |
| <b>PTN</b>                         | 9.98E-04 |
| <b>PUR8</b>                        | 2.38E-03 |
| <b>PYY</b>                         | 5.39E-04 |
| <b>RELT</b>                        | 2.52E-02 |
| <b>RET</b>                         | 2.82E-02 |

|                                  |          |
|----------------------------------|----------|
| <b>RGMB</b>                      | 4.22E-02 |
| <b>RS3</b>                       | 2.22E-02 |
| <b>RS7</b>                       | 1.01E-02 |
| <b>RSPO2</b>                     | 1.92E-02 |
| <b>RUXF</b>                      | 2.95E-04 |
| <b>SAA</b>                       | 1.11E-02 |
| <b>SARP-2</b>                    | 1.15E-02 |
| <b>SEPR</b>                      | 4.97E-02 |
| <b>sFRP-3</b>                    | 1.41E-04 |
| <b>SH21A</b>                     | 2.83E-02 |
| <b>SIRT2</b>                     | 6.14E-04 |
| <b>SLAF5</b>                     | 5.00E-03 |
| <b>SLIK5</b>                     | 1.67E-02 |
| <b>SOD</b>                       | 7.84E-03 |
| <b>SPARCL1</b>                   | 4.58E-02 |
| <b>SPINT2</b>                    | 1.35E-02 |
| <b>Spondin-1</b>                 | 3.24E-03 |
| <b>sRAGE</b>                     | 1.76E-02 |
| <b>sRANKL</b>                    | 2.30E-02 |
| <b>SREC-I</b>                    | 1.38E-02 |
| <b>STRATIFIN</b>                 | 5.80E-04 |
| <b>suPAR</b>                     | 1.97E-02 |
| <b>TARC</b>                      | 7.69E-03 |
| <b>TAU</b>                       | 1.46E-02 |
| <b>TEC</b>                       | 3.82E-02 |
| <b>Testican-2</b>                | 7.82E-03 |
| <b>TFPI</b>                      | 7.08E-05 |
| <b>TGF-b1</b>                    | 2.86E-02 |
| <b>TGF-b3</b>                    | 6.83E-03 |
| <b>TIG2</b>                      | 2.48E-02 |
| <b>TLR2</b>                      | 1.98E-02 |
| <b>TNFSF18</b>                   | 4.05E-02 |
| <b>TRAIL R1</b>                  | 2.78E-02 |
| <b>Transferrin</b>               | 1.92E-02 |
| <b>TrkA</b>                      | 1.56E-02 |
| <b>TrkB</b>                      | 1.99E-02 |
| <b>Tropomyosin 1 alpha chain</b> | 2.13E-02 |
| <b>Trypsin 2</b>                 | 4.02E-02 |
| <b>TSH</b>                       | 1.21E-02 |
| <b>TWEAK</b>                     | 2.08E-03 |
| <b>TYK2</b>                      | 3.36E-02 |
| <b>UNC5H3</b>                    | 2.61E-03 |
| <b>VEGF</b>                      | 2.34E-03 |

**VEGF121**

3.96E-02

**WFKN2**

3.50E-02

---

Proteins with  $P < 0.05$  (one-way ANOVA repeated measures,  $n=4$ ) were

excluded from PMI analyses, listed in alphabetical order. See **Supplemental**

**Table 1** for full protein names, Entrez Gene symbol, Entrez Gene ID and

UniProt ID.



**Supplemental Table 4. Proteins changed in the peripheral blood after myocardial injury**

| <b>Protein</b>                | <b>%Change (IQR)<br/>10 min vs. Baseline</b> | <b>%Change (IQR)<br/>1 hr vs. Baseline</b> | <b>%Change (IQR)<br/>24 hr vs. Baseline</b> | <b>P</b> |
|-------------------------------|----------------------------------------------|--------------------------------------------|---------------------------------------------|----------|
| <b>Angiogenin</b>             | 34.1 (29.3 to 61.8)                          | 24.5 (19.9 to 38.1)                        | -1.6 (-6.5 to 15.3)                         | 2.63E-06 |
| <b>annexin VI</b>             | -46.0 (-75.6 to -32.3)                       | -34.9 (-76.9 to -30.7)                     | 33.9 (21.5 to 193.1)                        | 3.58E-06 |
| <b>b-ECGF</b>                 | 72.7 (32.3 to 102.4)                         | 103 (82.0 to 158.9)                        | -3.4 (-7.2 to 6.5)                          | 1.34E-10 |
| <b>C3d</b>                    | -20.0 (-23.5 to -13.0)                       | -20.9 (-24.2 to -17.7)                     | 0.2 (-7.2 to 6.3)                           | 7.57E-06 |
| <b>Cadherin-12</b>            | 101 (34.9 to 168.7)                          | 213 (84.2 to 239.0)                        | 15.4 (-17.6 to 42.5)                        | 1.02E-04 |
| <b>Cardiotrophin-1</b>        | -15.3 (-18.3 to -9.5)                        | -17.3 (-21.3 to -13.4)                     | 1.5 (-5.6 to 4.6)                           | 4.52E-05 |
| <b>CATC</b>                   | -16.1 (-21.7 to -10.1)                       | -20.2 (-22.7 to -16.8)                     | 3.6 (-6.9 to 9.4)                           | 5.59E-09 |
| <b>CDC37</b>                  | 45.0 (2.1 to 69.2)                           | 64.3 (22.6 to 81.9)                        | 7.4 (-6.5 to 18.3)                          | 2.67E-07 |
| <b>CDK8/cyclin C</b>          | -13.3 (-17.4 to -10.1)                       | -12.2 (-17.8 to -7.9)                      | -5.0 (-7.9 to 1.3)                          | 1.96E-04 |
| <b>Chymase</b>                | 41.3 (22.3 to 52.6)                          | 43.3 (30.5 to 67.5)                        | 19.1 (-1.7 to 28.9)                         | 1.91E-04 |
| <b>CK-b-8-1</b>               | -7.6 (-15.0 to -4.5)                         | -21.1 (-26.3 to -17.2)                     | 22.4 (13.9 to 49.8)                         | 2.27E-05 |
| <b>CK-MB</b>                  | 144 (46.6 to 305.1)                          | 506 (374.5 to 690.6)                       | 346 (138.7 to 1053.3)                       | 9.60E-08 |
| <b>CK-MM</b>                  | 42.0 (13.7 to 81.4)                          | 233 (146.1 to 287.7)                       | 234 (108.1 to 484.9)                        | 7.28E-07 |
| <b>Cripto</b>                 | 45.5 (14.0 to 66.1)                          | 63.6 (24.4 to 80.7)                        | 4.9 (-7.3 to 16.4)                          | 1.74E-04 |
| <b>Dkk-4</b>                  | 124 (101.9 to 157.4)                         | 56.7 (39.6 to 100.1)                       | -11.2 (-24.1 to 12.5)                       | 1.29E-15 |
| <b>Dopa<br/>decarboxylase</b> | -20.8 (-26.7 to -11.9)                       | -22.1 (-25.5 to -14.7)                     | 8.8 (-9.5 to 19.4)                          | 2.48E-08 |
| <b>EPO-R</b>                  | -12.2 (-17.1 to 0.2)                         | -18.4 (-19.6 to -16.2)                     | 3.1 (-2.5 to 8.4)                           | 5.54E-06 |
| <b>FABP</b>                   | 178 (105.3 to 399.1)                         | 742 (551.8 to 1354.9)                      | 69.3 (5.3 to 235.0)                         | 1.28E-15 |
| <b>FAK1</b>                   | -13.4 (-17.4 to -9.9)                        | -16.8 (-21.0 to -11.3)                     | -3.2 (-8.7 to 4.4)                          | 6.35E-06 |
| <b>FCG2A/B</b>                | -9.5 (-12.9 to -3.5)                         | -9.2 (-15.3 to -4.5)                       | -7.4 (-11.2 to -1.9)                        | 1.93E-05 |
| <b>FGF-18</b>                 | 134 (83.6 to 173.0)                          | 272 (189.9 to 359.2)                       | -8.4 (-27.3 to 98.2)                        | 6.31E-08 |

|                      |                        |                        |                      |          |
|----------------------|------------------------|------------------------|----------------------|----------|
| <b>FGF-8B</b>        | 29.4 (15.7 to 38.9)    | 39.1 (26.1 to 56.9)    | -0.1 (-10.1 to 8.8)  | 1.54E-04 |
| <b>Galectin-8</b>    | -17.6 (-20.3 to -12.2) | -23.1 (-25.8 to -17.9) | -8.2 (-15.9 to 0.1)  | 1.77E-04 |
| <b>GAS1</b>          | 38.3 (18.8 to 51.7)    | 65.3 (35.7 to 79.5)    | 10.2 (1.0 to 15.1)   | 4.73E-05 |
| <b>GREM1</b>         | 131 (62.2 to 154.3)    | 176 (101.4 to 230.9)   | 2.2 (-5.6 to 20.6)   | 2.78E-07 |
| <b>HDGR2</b>         | 6.1 (-8.0 to 14.2)     | 19.9 (8.3 to 27.7)     | 6.7 (-5.7 to 13.9)   | 1.79E-05 |
| <b>Histone H2A.z</b> | -61.0 (-73.0 to -48.7) | -38.3 (-52.6 to -23.5) | 84.1 (31.4 to 257.0) | 5.41E-10 |
| <b>HNRPQ</b>         | -7.6 (-16.4 to -2.1)   | -13.6 (-19.1 to -0.5)  | 2.5 (-0.9 to 11.7)   | 9.21E-05 |
| <b>IL-11</b>         | 32.6 (15.8 to 48.0)    | 44.4 (19.2 to 63.4)    | 5.3 (-1.3 to 14.4)   | 3.65E-08 |
| <b>IL-12 Rb1</b>     | 11.5 (-0.3 to 16.0)    | 13.9 (4.8 to 27.1)     | -2.0 (-6.7 to 3.3)   | 2.17E-04 |
| <b>IL-13</b>         | -11.4 (-16.9 to -8.9)  | -15.3 (-19.0 to -14.2) | -1.0 (-5.4 to 3.5)   | 1.14E-04 |
| <b>IL-17D</b>        | 18.6 (7.6 to 23.9)     | 27.3 (18.6 to 37.3)    | 2.2 (-3.3 to 9.6)    | 7.55E-05 |
| <b>IL-1a</b>         | -18.7 (-24.1 to -14.4) | -23.8 (-31.1 to -20.8) | -3.7 (-4.9 to -0.3)  | 3.12E-05 |
| <b>IL-20 Ra</b>      | -12.0 (-16.9 to -8.1)  | -17.3 (-22.0 to -11.0) | -4.4 (-12.6 to 6.8)  | 2.75E-05 |
| <b>IL-34</b>         | 28.6 (18.9 to 51.0)    | 24.4 (11.2 to 27.0)    | 3.1 (-1.3 to 11.2)   | 8.71E-09 |
| <b>IL-5</b>          | 31.2 (17.7 to 59.0)    | 48.9 (30.5 to 71.8)    | 23.8 (-5.3 to 50.8)  | 3.98E-05 |
| <b>IL-6</b>          | -6.0 (-20.2 to 3.9)    | 7.0 (-11.6 to 13.2)    | 113 (35.9 to 173.7)  | 1.20E-04 |
| <b>JAML1</b>         | -13.6 (-16.3 to -8.9)  | -17.2 (-21.6 to -15.0) | -3.3 (-8.3 to 3.6)   | 2.29E-04 |
| <b>KIRR3</b>         | -13.6 (-19.7 to 0.5)   | -20.3 (-24.9 to -12.5) | -1.8 (-9.2 to 5.4)   | 1.40E-06 |
| <b>KREM2</b>         | 11.9 (4.6 to 27.8)     | 36.1 (24.9 to 39.7)    | -1.9 (-10.1 to 6.4)  | 1.08E-04 |
| <b>LBP</b>           | -28.9 (-40.5 to -26.6) | -30.5 (-36.9 to -23.1) | 78.5 (59.6 to 92.3)  | 1.03E-07 |
| <b>LDH-H 1</b>       | 6.7 (0.8 to 18.8)      | 8.7 (1.7 to 20.3)      | 73.4 (52.4 to 144.2) | 8.76E-14 |
| <b>LIF sR</b>        | 196 (126.8 to 247.0)   | 175 (114.2 to 217.0)   | 19.2 (-3.4 to 27.7)  | 2.68E-07 |
| <b>LIN7B</b>         | -17.3 (-20.4 to -1.6)  | -21.9 (-25.7 to -10.7) | -2.6 (-9.0 to 1.7)   | 1.58E-04 |
| <b>MDHC</b>          | 50.3 (14.6 to 67.0)    | 221 (149.3 to 279.4)   | 144 (45.4 to 232.4)  | 1.48E-08 |
| <b>MK13</b>          | -17.8 (-22.7 to -13.7) | -25.9 (-28.5 to -17.0) | -2.2 (-15.0 to 5.4)  | 5.77E-07 |

|                        |                        |                        |                      |          |
|------------------------|------------------------|------------------------|----------------------|----------|
| <b>MMP-13</b>          | 141 (102.7 to 237.8)   | 64.8 (36.1 to 170.4)   | 3.6 (-3.8 to 17.1)   | 1.65E-14 |
| <b>MMP-16</b>          | 50.7 (20.9 to 68.5)    | 62.2 (27.0 to 75.0)    | 7.1 (4.2 to 36.9)    | 7.33E-10 |
| <b>Myoglobin</b>       | 88.3 (59.5 to 161.1)   | 152 (105.7 to 231.0)   | 16.6 (-2.2 to 32.3)  | 8.53E-11 |
| <b>NACA</b>            | 49.7 (16.6 to 70.4)    | 43.3 (26.6 to 65.8)    | 25.8 (11.2 to 46.6)  | 4.72E-05 |
| <b>NET4</b>            | 115 (61.0 to 152.3)    | 63.3 (20.1 to 82.5)    | 1.7 (-9.9 to 23.4)   | 1.11E-04 |
| <b>NKp30</b>           | -14.8 (-18.9 to -5.7)  | -20.4 (-25.7 to -17.7) | -5.9 (-11.1 to 1.9)  | 1.16E-04 |
| <b>NMT1</b>            | -14.8 (-22.0 to -12.2) | -20.0 (-25.7 to -12.6) | -4.6 (-14.9 to 2.8)  | 1.93E-04 |
| <b>PDE7A</b>           | 27.9 (14.4 to 38.7)    | 30.5 (22.3 to 47.3)    | 6.0 (2.8 to 17.7)    | 2.45E-10 |
| <b>PDGF-CC</b>         | -20.5 (-22.6 to -9.8)  | -22.1 (-25.6 to -16.8) | -5.0 (-9.3 to 3.1)   | 1.98E-04 |
| <b>PDK1</b>            | -20.2 (-25.6 to -14.8) | -26.0 (-29.8 to -18.6) | -4.6 (-9.5 to 3.5)   | 5.15E-05 |
| <b>PLXC1</b>           | -9.9 (-15.1 to -8.0)   | -11.6 (-16.0 to -6.1)  | -9.3 (-12.5 to -3.8) | 2.01E-07 |
| <b>PPIB</b>            | 42.7 (17.8 to 78.4)    | 61.5 (38.3 to 95.5)    | 22.9 (10.6 to 59.0)  | 3.87E-05 |
| <b>PTP-1B</b>          | -11.2 (-15.8 to -7.0)  | -7.7 (-16.4 to -3.6)   | 4.9 (-6.1 to 12.9)   | 6.80E-05 |
| <b>RTN4</b>            | -4.2 (-10.8 to 0.9)    | -0.2 (-3.7 to 9.1)     | -7.2 (-10.1 to -2.3) | 2.01E-04 |
| <b>SCGF-alpha</b>      | 31.4 (19.0 to 55.7)    | 48.0 (32.4 to 70.2)    | 13.7 (2.3 to 34.2)   | 5.89E-07 |
| <b>SDF-1</b>           | 120 (78.8 to 193.9)    | 82.8 (45.3 to 119.4)   | -6.7 (-17.3 to 3.5)  | 4.41E-06 |
| <b>Secretin</b>        | -16.5 (-18.9 to -12.5) | -17.8 (-21.6 to -12.2) | -1.1 (-8.2 to 1.2)   | 1.52E-12 |
| <b>SIG14</b>           | -7.6 (-12.1 to -3.5)   | -11.3 (-14.1 to -4.5)  | 0.3 (-2.8 to 19.5)   | 4.44E-06 |
| <b>Somatostatin-28</b> | 7.3 (-2.9 to 14.6)     | 25.8 (7.4 to 36.9)     | 0.9 (-3.3 to 6.4)    | 1.99E-04 |
| <b>SPHK2</b>           | -14.0 (-16.0 to -10.2) | -16.4 (-19.0 to -14.2) | -4.2 (-9.9 to 0.6)   | 6.33E-12 |
| <b>ST4S6</b>           | 43.6 (33.1 to 58.8)    | 20.7 (12.9 to 34.5)    | 7.2 (-5.4 to 33.3)   | 9.94E-07 |
| <b>sTie-2</b>          | -16.1 (-20.9 to -10.3) | -21.9 (-27.1 to -17.4) | -3.2 (-9.3 to -0.3)  | 4.54E-05 |
| <b>TCPTP</b>           | -7.3 (-9.8 to -4.8)    | -7.4 (-9.8 to -3.8)    | -3.8 (-6.0 to 1.6)   | 7.96E-08 |
| <b>TECK</b>            | 530 (264.8 to 634.9)   | 213 (80.5 to 251.4)    | -20.1 (-33.3 to 9.7) | 5.53E-18 |
| <b>Thrombopoietin</b>  | -12.0 (-17.1 to -7.1)  | -15.1 (-20.1 to -11.0) | -1.3 (-4.7 to 1.1)   | 8.73E-06 |

**Receptor**

|                      |                        |                        |                       |          |
|----------------------|------------------------|------------------------|-----------------------|----------|
| <b>Transketolase</b> | 32.1 (7.7 to 72.9)     | 85.3 (53.4 to 151.3)   | 2.7 (-9.8 to 40.1)    | 4.24E-08 |
| <b>TPI</b>           | 45.1 (8.1 to 58.2)     | 89.1 (59.3 to 145.7)   | 2.4 (-9.1 to 37.5)    | 4.21E-08 |
| <b>Troponin I</b>    | 836 (452 to 1241)      | 2692 (1756 to 5241)    | 11400 (8435 to 20459) | 1.34E-26 |
| <b>TRY3</b>          | -14.3 (-20.5 to -11.8) | -18.0 (-20.7 to -15.9) | 5.6 (-4.2 to 11.9)    | 1.13E-04 |
| <b>TWEAKR</b>        | -16.1 (-19.9 to 3.1)   | -24.2 (-26.1 to -5.9)  | -9.3 (-13.4 to 7.9)   | 1.31E-04 |
| <b>URB</b>           | 39.1 (23.7 to 51.9)    | 18.9 (12.1 to 25.8)    | -17.6 (-26.4 to -4.5) | 1.76E-04 |
| <b>WNT7A</b>         | -16.7 (-19.4 to -13.0) | -21.4 (-22.6 to -17.8) | -2.2 (-9.5 to 3.2)    | 1.15E-04 |

---

All proteins in validation cohort with  $P < 2.30 \times 10^{-4}$  (one-way ANOVA on log transformed RFU values), listed in alphabetical order. All proteins listed were significant in derivation cohort with  $P < 5.70 \times 10^{-5}$  (one-way ANOVA on log transformed RFU values). Change values denote median percent change (first and third quartiles). See **Supplemental Table 1** for full protein names, Entrez Gene symbol, Entrez Gene ID and UniProt ID.

**Supplemental Table 5. Novel proteins that increased in coronary sinus versus periphery after PMI**

| <b>Protein</b>     | <b>Fold Change at 10 min<br/>(CS vs. Peripheral)</b> | <b>Fold Change at 1hr<br/>(CS vs. Peripheral)</b> | <b><i>P</i></b> |
|--------------------|------------------------------------------------------|---------------------------------------------------|-----------------|
| <b>GREM1</b>       | 1.9                                                  | 1.4                                               | 1.17E-04        |
| <b>IL-11</b>       | 1.6                                                  | 1.2                                               | 4.96E-04        |
| <b>Cripto</b>      | 2.3                                                  | 1.6                                               | 1.00E-03        |
| <b>Cadherin-12</b> | 2.1                                                  | 1.8                                               | 1.36E-03        |
| <b>GAS1</b>        | 2.4                                                  | 1.9                                               | 1.85E-03        |
| <b>CDC37</b>       | 1.6                                                  | 1.3                                               | 3.43E-03        |
| <b>IL-12 Rb1</b>   | 5.3                                                  | 2.2                                               | 9.46E-03        |
| <b>MMP-16</b>      | 1.6                                                  | 1.4                                               | 1.77E-02        |
| <b>KREM2</b>       | 3.7                                                  | 2.2                                               | 2.78E-02        |

Shown are proteins that increased at 10 min and/or 1 hr in the coronary sinus compared to peripheral blood with  $P < 0.05$ , listed in ascending  $P$  (2-way ANOVA on log transformed RFU values). See **Supplemental Table 1** for full protein names, Entrez Gene Symbol, Entrez Gene ID and UniProt ID.

**Supplemental Table 6. Clinical characteristics of the FHS participants (n=899)**

|                                          |             |
|------------------------------------------|-------------|
| <b>Age (yrs)</b>                         | 56 ± 10     |
| <b>Female (%)</b>                        | 52          |
| <b>Framingham Risk Score<sup>†</sup></b> | 3.34 ± 4.03 |
| <b>Total Cholesterol (mg/dl)</b>         | 207 ± 37    |
| <b>HDL (mg/dl)‡</b>                      | 49 ± 15     |
| <b>Systolic blood pressure (mmHg)</b>    | 129 ± 20    |
| <b>Diabetes (%)</b>                      | 9           |
| <b>Smoking (%)</b>                       | 20          |

† n=893, ‡ n=897

Supplemental Table 7. Top FHS protein associations with age (sex-adjusted)

**Age**

| <b>Protein</b>                | <b>Estimated <math>\beta</math></b> | <b>S.E.</b> | <b>P</b> |
|-------------------------------|-------------------------------------|-------------|----------|
| <b>PTN</b>                    | 0.5036                              | 0.0281      | 1.02E-61 |
| <b>FSH</b>                    | 0.3719                              | 0.0215      | 7.05E-58 |
| <b>MMP 12</b>                 | 0.4406                              | 0.0295      | 3.01E-45 |
| <b>HCG</b>                    | 0.3279                              | 0.0253      | 2.27E-35 |
| <b>Cathepsin V</b>            | -0.3948                             | 0.0309      | 1.71E-34 |
| <b>ERBB1</b>                  | -0.3773                             | 0.0295      | 1.81E-34 |
| <b>URB</b>                    | 0.3750                              | 0.0311      | 3.51E-31 |
| <b>DKK4</b>                   | 0.3716                              | 0.0308      | 3.86E-31 |
| <b>FSTL3</b>                  | 0.3568                              | 0.0300      | 2.16E-30 |
| <b>Luteinizing hormone</b>    | 0.2672                              | 0.0230      | 2.94E-29 |
| <b>Chitotriosidase 1</b>      | 0.3644                              | 0.0315      | 7.16E-29 |
| <b>DERM</b>                   | 0.3593                              | 0.0314      | 2.33E-28 |
| <b>b2 Microglobulin</b>       | 0.3365                              | 0.0310      | 7.68E-26 |
| <b>a2 Antiplasmin</b>         | -0.3365                             | 0.0320      | 1.78E-24 |
| <b>Cystatin C</b>             | 0.3149                              | 0.0304      | 8.93E-24 |
| <b>Carbonic anhydrase III</b> | 0.3151                              | 0.0310      | 4.23E-23 |
| <b>PH</b>                     | 0.3209                              | 0.0318      | 1.00E-22 |
| <b>CYTD</b>                   | 0.3161                              | 0.0314      | 1.18E-22 |
| <b>UNC5H3</b>                 | 0.3118                              | 0.0313      | 2.84E-22 |
| <b>TNF sR I</b>               | 0.2901                              | 0.0294      | 7.50E-22 |
| <b>CRDL1</b>                  | 0.3003                              | 0.0306      | 1.14E-21 |
| <b>CDON</b>                   | -0.3018                             | 0.0309      | 1.91E-21 |

|                               |         |        |          |
|-------------------------------|---------|--------|----------|
| <b>SCF sR</b>                 | -0.2958 | 0.0316 | 6.16E-20 |
| <b>ATS13</b>                  | -0.2953 | 0.0316 | 7.40E-20 |
| <b>ADAMTS 5</b>               | 0.3004  | 0.0327 | 2.54E-19 |
| <b>DKK3</b>                   | 0.2865  | 0.0317 | 8.78E-19 |
| <b>Cathepsin H</b>            | 0.2781  | 0.0310 | 1.50E-18 |
| <b>MMP 7</b>                  | 0.2712  | 0.0302 | 1.61E-18 |
| <b>sL Selectin</b>            | -0.2848 | 0.0318 | 2.11E-18 |
| <b>PARC</b>                   | 0.2761  | 0.0316 | 1.14E-17 |
| <b>Antithrombin III</b>       | -0.2769 | 0.0319 | 1.82E-17 |
| <b>Epithelial cell kinase</b> | 0.2752  | 0.0322 | 5.02E-17 |
| <b>HAI 1</b>                  | -0.2686 | 0.0316 | 7.14E-17 |
| <b>Layilin</b>                | 0.2763  | 0.0326 | 9.47E-17 |
| <b>XEDAR</b>                  | 0.2806  | 0.0332 | 1.24E-16 |
| <b>tPA</b>                    | 0.2706  | 0.0323 | 1.85E-16 |
| <b>IL 16</b>                  | 0.2716  | 0.0324 | 1.98E-16 |
| <b>MP2K2</b>                  | 0.2709  | 0.0325 | 3.19E-16 |
| <b>Prothrombin</b>            | -0.2613 | 0.0316 | 4.61E-16 |
| <b>Spondin 1</b>              | 0.2674  | 0.0324 | 5.74E-16 |

---

Shown are the top 40 proteins listed by ascending *P*. See **Supplemental Table 1** for full protein names, Entrez Gene symbol, Entrez Gene ID and UniProt ID.



Supplemental Table 8. Top FHS protein associations with female sex (age-adjusted)

**Female**

| <b>Protein</b>             | <b>Estimated <math>\beta</math></b> | <b>S.E.</b> | <b><i>P</i></b> |
|----------------------------|-------------------------------------|-------------|-----------------|
| <b>FSH</b>                 | 1.3625                              | 0.0431      | 4.13E-148       |
| <b>Luteinizing hormone</b> | 1.3865                              | 0.0459      | 8.36E-139       |
| <b>Leptin</b>              | 1.2592                              | 0.0538      | 7.76E-95        |
| <b>HCG</b>                 | 1.1301                              | 0.0506      | 2.52E-88        |
| <b>PSA</b>                 | -0.9177                             | 0.0546      | 2.87E-55        |
| <b>SAP</b>                 | -0.9763                             | 0.0606      | 1.57E-51        |
| <b>LSAMP</b>               | 0.7875                              | 0.0556      | 3.14E-41        |
| <b>Nidogen</b>             | -0.8601                             | 0.0613      | 1.55E-40        |
| <b>IGFBP 3</b>             | 0.7983                              | 0.0569      | 1.62E-40        |
| <b>Albumin</b>             | -0.8251                             | 0.0599      | 2.37E-39        |
| <b>Myoglobin</b>           | -0.8159                             | 0.0615      | 7.79E-37        |
| <b>ALCAM</b>               | 0.7991                              | 0.0606      | 2.12E-36        |
| <b>Persephin</b>           | -0.7880                             | 0.0605      | 1.20E-35        |
| <b>IGFBP 6</b>             | -0.7319                             | 0.0597      | 4.96E-32        |
| <b>BGH3</b>                | -0.7619                             | 0.0623      | 6.89E-32        |
| <b>MMP 3</b>               | -0.7704                             | 0.0637      | 2.71E-31        |
| <b>IL 1 R4</b>             | -0.7657                             | 0.0637      | 6.40E-31        |
| <b>SHBG</b>                | 0.7651                              | 0.0638      | 8.30E-31        |
| <b>Angiogenin</b>          | -0.7344                             | 0.0642      | 2.29E-28        |
| <b>RELT</b>                | -0.7017                             | 0.0624      | 1.55E-27        |
| <b>GDF 11</b>              | -0.6491                             | 0.0597      | 5.70E-26        |

|                             |         |        |          |
|-----------------------------|---------|--------|----------|
| <b>WFKN1</b>                | -0.6485 | 0.0615 | 1.47E-24 |
| <b>Carbonic anhydrase 6</b> | -0.6489 | 0.0621 | 3.20E-24 |
| <b>FETUB</b>                | 0.6637  | 0.0642 | 9.60E-24 |
| <b>Troponin I skel fast</b> |         |        |          |
| <b>twitch</b>               | -0.6530 | 0.0635 | 1.50E-23 |
| <b>Angiotensinogen</b>      | 0.6549  | 0.0648 | 8.58E-23 |
| <b>CK MM</b>                | -0.6248 | 0.0623 | 1.71E-22 |
| <b>Thyroxine Binding</b>    |         |        |          |
| <b>Globulin</b>             | 0.6378  | 0.0637 | 1.81E-22 |
| <b>Galectin 3</b>           | 0.6146  | 0.0617 | 3.17E-22 |
| <b>NPS PLA2</b>             | 0.6149  | 0.0623 | 6.71E-22 |
| <b>NID2</b>                 | -0.6218 | 0.0649 | 9.46E-21 |
| <b>Adiponectin</b>          | 0.6042  | 0.0639 | 2.71E-20 |
| <b>a2 Macroglobulin</b>     | 0.6077  | 0.0658 | 1.76E-19 |
| <b>LEAP 1</b>               | -0.6020 | 0.0652 | 1.83E-19 |
| <b>IGF I</b>                | 0.5873  | 0.0638 | 2.23E-19 |
| <b>Cystatin M</b>           | -0.5559 | 0.0605 | 2.56E-19 |
| <b>ROBO2</b>                | 0.5775  | 0.0635 | 6.08E-19 |
| <b>HCC 4</b>                | -0.5869 | 0.0650 | 1.10E-18 |
| <b>ERBB3</b>                | 0.5452  | 0.0605 | 1.15E-18 |
| <b>Lymphotoxin a1 b2</b>    | 0.5502  | 0.0625 | 6.70E-18 |

---

Shown are the top 40 proteins listed by ascending *P*. See **Supplemental Table 1** for full protein names, Entrez Gene symbol, Entrez Gene ID and UniProt ID.

**Supplemental Table 9. Top FHS protein associations with total cholesterol (age- and sex-adjusted)**

**Total Cholesterol**

| <b>Protein</b>       | <b>Estimated <math>\beta</math></b> | <b>S.E.</b> | <b><i>P</i></b> |
|----------------------|-------------------------------------|-------------|-----------------|
| <b>Apo E4</b>        | 0.5428                              | 0.0297      | 1.22E-63        |
| <b>Apo E</b>         | 0.5265                              | 0.0297      | 1.45E-60        |
| <b>Apo E3</b>        | 0.5148                              | 0.0309      | 1.88E-54        |
| <b>Apo E2</b>        | 0.4603                              | 0.0323      | 1.31E-41        |
| <b>Apo B</b>         | 0.3918                              | 0.0314      | 4.60E-33        |
| <b>TFPI</b>          | 0.3837                              | 0.0313      | 5.32E-32        |
| <b>BMP 1</b>         | 0.3476                              | 0.0310      | 1.83E-27        |
| <b>Protein C</b>     | 0.3143                              | 0.0320      | 9.44E-22        |
| <b>TSG 6</b>         | -0.3152                             | 0.0335      | 4.02E-20        |
| <b>Cadherin E</b>    | 0.3066                              | 0.0331      | 1.61E-19        |
| <b>NRP1</b>          | -0.2977                             | 0.0325      | 3.23E-19        |
| <b>TIMP 2</b>        | -0.2932                             | 0.0333      | 6.49E-18        |
| <b>Prekallikrein</b> | 0.2577                              | 0.0317      | 1.32E-15        |
| <b>ERBB3</b>         | 0.2430                              | 0.0300      | 1.72E-15        |
| <b>AMHR2</b>         | -0.2634                             | 0.0328      | 2.80E-15        |
| <b>IgG</b>           | -0.2584                             | 0.0328      | 1.00E-14        |
| <b>Desmoglein 2</b>  | -0.2519                             | 0.0323      | 1.80E-14        |
| <b>Endocan</b>       | -0.2585                             | 0.0337      | 4.21E-14        |
| <b>PCSK9</b>         | 0.2538                              | 0.0332      | 5.71E-14        |
| <b>Ficolin 3</b>     | 0.2521                              | 0.0333      | 8.68E-14        |

|                              |         |        |          |
|------------------------------|---------|--------|----------|
| <b>PAFAH</b>                 | 0.2449  | 0.0336 | 6.75E-13 |
| <b>Notch 3</b>               | -0.2435 | 0.0339 | 1.48E-12 |
| <b>RTN4</b>                  | -0.2370 | 0.0331 | 1.75E-12 |
| <b>SAP</b>                   | 0.2160  | 0.0303 | 2.00E-12 |
| <b>PAPP A</b>                | -0.2271 | 0.0329 | 1.01E-11 |
| <b>TECK</b>                  | 0.2308  | 0.0335 | 1.09E-11 |
| <b>Angiostatin</b>           | 0.2203  | 0.0327 | 2.89E-11 |
| <b>Growth hormone</b>        |         |        |          |
| <b>receptor</b>              | 0.2238  | 0.0337 | 5.18E-11 |
| <b>Protein S</b>             | 0.2191  | 0.0330 | 5.25E-11 |
| <b>Laminin</b>               | 0.2100  | 0.0320 | 8.71E-11 |
| <b>a1 Antitrypsin</b>        | -0.2193 | 0.0335 | 9.92E-11 |
| <b>IGFBP 2</b>               | -0.2130 | 0.0328 | 1.44E-10 |
| <b>Proteinase 3</b>          | -0.2119 | 0.0334 | 3.60E-10 |
| <b>Coagulation Factor Xa</b> | 0.2028  | 0.0321 | 4.10E-10 |
| <b>SHBG</b>                  | -0.2027 | 0.0321 | 4.24E-10 |
| <b>resistin</b>              | -0.2071 | 0.0329 | 4.85E-10 |
| <b>Apo A I</b>               | 0.2223  | 0.0356 | 6.26E-10 |
| <b>PAI 1</b>                 | 0.2134  | 0.0342 | 6.45E-10 |
| <b>tPA</b>                   | 0.2010  | 0.0324 | 8.83E-10 |
| <b>Aminoacylase 1</b>        | 0.2046  | 0.0334 | 1.42E-09 |

---

Shown are the top 40 proteins listed by ascending *P*. See **Supplemental Table 1** for full protein names, Entrez Gene symbol, Entrez Gene ID and UniProt ID.

Supplemental Table 10. Top FHS protein associations with HDL cholesterol (age- and sex-adjusted)

### HDl Cholesterol

| Protein              | Estimated $\beta$ | S.E.   | <i>P</i> |
|----------------------|-------------------|--------|----------|
| Adiponectin          | 0.4779            | 0.0298 | 4.73E-51 |
| SHBG                 | 0.4216            | 0.0307 | 3.48E-39 |
| Nogo Receptor        | -0.3737           | 0.0339 | 1.24E-26 |
| PAI 1                | -0.3661           | 0.0339 | 1.14E-25 |
| Carbonic anhydrase 6 | 0.3275            | 0.0311 | 1.56E-24 |
| IGFBP 2              | 0.3317            | 0.0327 | 6.21E-23 |
| IGFBP 1              | 0.3156            | 0.0329 | 8.26E-21 |
| Factor H             | -0.3040           | 0.0342 | 3.65E-18 |
| Antithrombin III     | 0.2789            | 0.0325 | 4.42E-17 |
| CRP                  | -0.2947           | 0.0348 | 9.74E-17 |
| BFL1                 | 0.2859            | 0.0339 | 1.32E-16 |
| Leptin               | -0.2313           | 0.0275 | 1.70E-16 |
| MnSOD                | 0.2707            | 0.0327 | 4.28E-16 |
| MMP 2                | 0.2784            | 0.0340 | 9.00E-16 |
| Sonic Hedgehog       | 0.2785            | 0.0343 | 1.49E-15 |
| tPA                  | -0.2656           | 0.0330 | 2.82E-15 |
| TrkC                 | 0.2682            | 0.0338 | 5.87E-15 |
| sCD163               | -0.2645           | 0.0334 | 7.03E-15 |
| Wfkn2                | 0.2598            | 0.0330 | 1.02E-14 |
| CD23                 | -0.2551           | 0.0339 | 1.24E-13 |

|                                |         |        |          |
|--------------------------------|---------|--------|----------|
| <b>Met</b>                     | 0.2625  | 0.0351 | 1.75E-13 |
| <b>AK1A1</b>                   | -0.2496 | 0.0337 | 2.81E-13 |
| <b>Cathepsin S</b>             | -0.2507 | 0.0341 | 4.50E-13 |
| <b>NCAM 120</b>                | 0.2470  | 0.0338 | 6.31E-13 |
| <b>GFRa 1</b>                  | -0.2504 | 0.0348 | 1.27E-12 |
| <b>ERBB1</b>                   | 0.2193  | 0.0305 | 1.32E-12 |
| <b>C1s</b>                     | -0.2462 | 0.0345 | 1.86E-12 |
| <b>PARC</b>                    | -0.2318 | 0.0326 | 2.52E-12 |
| <b>DKK3</b>                    | 0.2314  | 0.0326 | 2.69E-12 |
| <b>TSP2</b>                    | -0.2389 | 0.0338 | 3.24E-12 |
| <b>Mammaglobin 2</b>           | 0.2399  | 0.0351 | 1.56E-11 |
| <b>Growth hormone receptor</b> | -0.2346 | 0.0347 | 2.59E-11 |
| <b>Cathepsin V</b>             | 0.2141  | 0.0320 | 3.87E-11 |
| <b>IL 1 R AcP</b>              | 0.2240  | 0.0335 | 3.95E-11 |
| <b>Apo E4</b>                  | -0.2332 | 0.0349 | 4.03E-11 |
| <b>Notch 3</b>                 | 0.2337  | 0.0351 | 4.75E-11 |
| <b>MDC</b>                     | -0.2200 | 0.0331 | 5.10E-11 |
| <b>C1QBP</b>                   | 0.2284  | 0.0346 | 7.02E-11 |
| <b>CCL28</b>                   | 0.2320  | 0.0358 | 1.48E-10 |
| <b>TGF b R III</b>             | 0.2231  | 0.0345 | 1.59E-10 |

---

Shown are the top 40 proteins listed by ascending *P*. See **Supplemental Table 1** for full protein names, Entrez Gene symbol, Entrez Gene ID and Uniprot ID.

Supplemental Table 11. Top FHS protein associations with SBP (age- and sex-adjusted)

**Systolic Blood Pressure**

| <b>Protein</b>                 | <b>Estimated <math>\beta</math></b> | <b>S.E.</b> | <b><i>P</i></b> |
|--------------------------------|-------------------------------------|-------------|-----------------|
| <b>IGFBP 2</b>                 | -0.3153                             | 0.0340      | 1.46E-19        |
| <b>PAI 1</b>                   | 0.3227                              | 0.0354      | 5.10E-19        |
| <b>Growth hormone receptor</b> | 0.3078                              | 0.0351      | 9.22E-18        |
| <b>Coagulation Factor IXab</b> | 0.3004                              | 0.0349      | 3.51E-17        |
| <b>Coagulation Factor IX</b>   | 0.3002                              | 0.0351      | 4.73E-17        |
| <b>tPA</b>                     | 0.2887                              | 0.0338      | 5.47E-17        |
| <b>SHBG</b>                    | -0.2833                             | 0.0335      | 1.06E-16        |
| <b>CRP</b>                     | 0.2822                              | 0.0359      | 1.08E-14        |
| <b>IGFBP 1</b>                 | -0.2665                             | 0.0344      | 2.48E-14        |
| <b>Leptin</b>                  | 0.2187                              | 0.0284      | 3.72E-14        |
| <b>Aminoacylase 1</b>          | 0.2603                              | 0.0352      | 3.02E-13        |
| <b>DKK3</b>                    | -0.2466                             | 0.0335      | 4.10E-13        |
| <b>Factor I</b>                | 0.2539                              | 0.0347      | 5.82E-13        |
| <b>SAP</b>                     | 0.2322                              | 0.0321      | 9.80E-13        |
| <b>TFPI</b>                    | 0.2510                              | 0.0349      | 1.38E-12        |
| <b>Adiponectin</b>             | -0.2364                             | 0.0339      | 6.07E-12        |
| <b>PHI</b>                     | 0.2465                              | 0.0356      | 8.65E-12        |
| <b>BMP 1</b>                   | 0.2329                              | 0.0342      | 1.77E-11        |
| <b>Endocan</b>                 | -0.2427                             | 0.0360      | 2.69E-11        |
| <b>sE Selectin</b>             | 0.2258                              | 0.0345      | 1.02E-10        |
| <b>LG3BP</b>                   | 0.2268                              | 0.0350      | 1.46E-10        |

|                         |         |        |          |
|-------------------------|---------|--------|----------|
| <b>CHL1</b>             | -0.2257 | 0.0355 | 3.11E-10 |
| <b>LSAMP</b>            | -0.1877 | 0.0297 | 3.84E-10 |
| <b>Antithrombin III</b> | -0.2138 | 0.0340 | 5.09E-10 |
| <b>Renin</b>            | -0.2081 | 0.0334 | 6.88E-10 |
| <b>NCAM 120</b>         | -0.2095 | 0.0351 | 3.37E-09 |
| <b>Laminin</b>          | 0.2018  | 0.0341 | 4.56E-09 |
| <b>Factor H</b>         | 0.2123  | 0.0360 | 5.19E-09 |
| <b>Afamin</b>           | 0.2100  | 0.0363 | 1.03E-08 |
| <b>sRAGE</b>            | -0.2016 | 0.0351 | 1.23E-08 |
| <b>RET</b>              | 0.1990  | 0.0346 | 1.24E-08 |
| <b>Notch 1</b>          | -0.1992 | 0.0348 | 1.44E-08 |
| <b>IGFBP 4</b>          | 0.2086  | 0.0369 | 2.08E-08 |
| <b>ESAM</b>             | -0.1899 | 0.0336 | 2.16E-08 |
| <b>bFGF R</b>           | -0.1949 | 0.0355 | 5.28E-08 |
| <b>HDGR2</b>            | 0.1937  | 0.0355 | 6.39E-08 |
| <b>OMD</b>              | -0.1893 | 0.0349 | 7.58E-08 |
| <b>SDF 1</b>            | -0.1996 | 0.0369 | 8.02E-08 |
| <b>TIMP 2</b>           | -0.1943 | 0.0362 | 1.05E-07 |

---

Shown are the top 40 proteins listed by ascending *P*. See **Supplemental Table 1** for full protein names, Entrez Gene symbol, Entrez Gene ID and UniProt ID.



**Supplemental Table 12. Top FHS protein associations with diabetes (age- and sex-adjusted)**

**Diabetes**

| <b>Protein</b>             | <b>Estimated <math>\beta</math></b> | <b>S.E.</b> | <b><i>P</i></b> |
|----------------------------|-------------------------------------|-------------|-----------------|
| <b>Gelsolin</b>            | -1.3026                             | 0.1329      | 1.28E-21        |
| <b>IL 18 Ra</b>            | 1.0707                              | 0.1358      | 8.97E-15        |
| <b>Adiponectin</b>         | -1.0259                             | 0.1307      | 1.21E-14        |
| <b>Collectin Kidney 1</b>  | 0.9927                              | 0.1333      | 2.24E-13        |
| <b>IGFBP 2</b>             | -0.9678                             | 0.1345      | 1.31E-12        |
| <b>PGCB</b>                | -0.9643                             | 0.1344      | 1.50E-12        |
| <b>LG3BP</b>               | 0.9228                              | 0.1354      | 1.71E-11        |
| <b>SHBG</b>                | -0.8852                             | 0.1318      | 3.26E-11        |
| <b>Trypsin</b>             | -0.8259                             | 0.1245      | 5.68E-11        |
| <b>PAI 1</b>               | 0.9228                              | 0.1403      | 8.14E-11        |
| <b>Angiopoietin 2</b>      | 0.8664                              | 0.1339      | 1.60E-10        |
| <b>C2</b>                  | 0.8504                              | 0.1327      | 2.38E-10        |
| <b>Galectin 4</b>          | 0.8415                              | 0.1363      | 9.94E-10        |
| <b>PERL</b>                | 0.8067                              | 0.1318      | 1.40E-09        |
| <b>TGF b R III</b>         | -0.8363                             | 0.1387      | 2.43E-09        |
| <b>Siglec 7</b>            | 0.8101                              | 0.1372      | 5.04E-09        |
| <b>Transferrin</b>         | -0.7706                             | 0.1337      | 1.12E-08        |
| <b>TSP2</b>                | 0.7738                              | 0.1359      | 1.70E-08        |
| <b>UNC5H4</b>              | -0.7650                             | 0.1359      | 2.44E-08        |
| <b>a1 Antichymotrypsin</b> | -0.7827                             | 0.1399      | 2.97E-08        |
| <b>tPA</b>                 | 0.7481                              | 0.1341      | 3.19E-08        |

|                         |         |        |          |
|-------------------------|---------|--------|----------|
| <b>Apo B</b>            | -0.7648 | 0.1377 | 3.69E-08 |
| <b>PLXC1</b>            | 0.7507  | 0.1353 | 3.76E-08 |
| <b>Prothrombin</b>      | -0.7237 | 0.1313 | 4.66E-08 |
| <b>MIA</b>              | -0.7771 | 0.1423 | 6.20E-08 |
| <b>Antithrombin III</b> | -0.7130 | 0.1327 | 9.97E-08 |
| <b>NCAM 120</b>         | -0.7175 | 0.1368 | 1.93E-07 |
| <b>Laminin</b>          | 0.6939  | 0.1328 | 2.18E-07 |
| <b>Semaphorin 6A</b>    | 0.7195  | 0.1393 | 2.96E-07 |
| <b>IL 23 R</b>          | 0.6968  | 0.1350 | 2.99E-07 |
| <b>IL 1 R AcP</b>       | -0.6935 | 0.1348 | 3.27E-07 |
| <b>Renin</b>            | 0.6666  | 0.1304 | 3.92E-07 |
| <b>IGFBP 6</b>          | -0.6349 | 0.1245 | 4.19E-07 |
| <b>ENPP7</b>            | 0.7092  | 0.1397 | 4.71E-07 |
| <b>OMD</b>              | -0.6823 | 0.1358 | 6.08E-07 |
| <b>Apo E</b>            | 0.7003  | 0.1401 | 6.99E-07 |
| <b>Nogo Receptorz</b>   | 0.6929  | 0.1419 | 1.23E-06 |
| <b>Aminoacylase 1</b>   | 0.6766  | 0.1387 | 1.27E-06 |
| <b>Cathepsin D</b>      | 0.6929  | 0.1428 | 1.44E-06 |
| <b>RSPO2</b>            | 0.7015  | 0.1453 | 1.61E-06 |

---

Shown are the top 40 proteins listed by ascending *P*. See **Supplemental Table 1** for full protein names, Entrez Gene symbol, Entrez Gene ID and UniProt ID.

**Supplemental Table 13. Top FHS protein associations with smoking (age- and sex-adjusted)**

**Smoking**

| <b>Protein</b>              | <b>Estimated <math>\beta</math></b> | <b>S.E.</b> | <b><i>P</i></b> |
|-----------------------------|-------------------------------------|-------------|-----------------|
| <b>PIGR</b>                 | 1.1623                              | 0.0769      | 3.75E-46        |
| <b>MMP 12</b>               | 0.7673                              | 0.0702      | 3.70E-26        |
| <b>OMD</b>                  | -0.8299                             | 0.0778      | 4.25E-25        |
| <b>SLIK5</b>                | -0.7043                             | 0.0783      | 1.37E-18        |
| <b>SLPI</b>                 | 0.7155                              | 0.0825      | 1.98E-17        |
| <b>sICAM 5</b>              | 0.7032                              | 0.0812      | 2.26E-17        |
| <b>EMR2</b>                 | -0.6363                             | 0.0794      | 3.48E-15        |
| <b>WFKN1</b>                | -0.5728                             | 0.0757      | 9.46E-14        |
| <b>Heparin cofactor II</b>  | 0.5983                              | 0.0835      | 1.63E-12        |
| <b>NCAM 120</b>             | -0.5709                             | 0.0811      | 3.76E-12        |
| <b>MDC</b>                  | 0.5466                              | 0.0789      | 8.42E-12        |
| <b>Cathepsin H</b>          | 0.5234                              | 0.0765      | 1.47E-11        |
| <b>bFGF R</b>               | -0.5580                             | 0.0820      | 1.82E-11        |
| <b>RGM C</b>                | -0.5577                             | 0.0823      | 2.20E-11        |
| <b>MMP 7</b>                | 0.5059                              | 0.0747      | 2.34E-11        |
| <b>Carbonic anhydrase 6</b> | -0.5112                             | 0.0769      | 5.08E-11        |
| <b>Angiopoietin 2</b>       | 0.5268                              | 0.0803      | 8.87E-11        |
| <b>Siglec 7</b>             | 0.5280                              | 0.0820      | 1.97E-10        |
| <b>FUT5</b>                 | 0.4993                              | 0.0809      | 1.02E-09        |
| <b>Laminin</b>              | 0.4886                              | 0.0792      | 1.04E-09        |
| <b>MMP 1</b>                | 0.5141                              | 0.0842      | 1.52E-09        |

|                               |         |        |          |
|-------------------------------|---------|--------|----------|
| <b>M CSF R</b>                | -0.4886 | 0.0811 | 2.48E-09 |
| <b>DERM</b>                   | -0.4698 | 0.0781 | 2.64E-09 |
| <b>Eotaxin</b>                | 0.4848  | 0.0807 | 2.69E-09 |
| <b>P Selectin</b>             | 0.4817  | 0.0814 | 4.66E-09 |
| <b>Haptoglobin Mixed Type</b> | 0.4885  | 0.0836 | 7.20E-09 |
| <b>Nogo Receptorz</b>         | -0.4944 | 0.0846 | 7.21E-09 |
| <b>ATS13</b>                  | -0.4590 | 0.0787 | 7.65E-09 |
| <b>LAG 3</b>                  | -0.4830 | 0.0829 | 8.04E-09 |
| <b>Semaphorin 3E</b>          | -0.4806 | 0.0829 | 9.32E-09 |
| <b>MMP 9</b>                  | 0.4612  | 0.0824 | 2.94E-08 |
| <b>Trypsin 2</b>              | 0.4504  | 0.0812 | 3.81E-08 |
| <b>Desmoglein 2</b>           | -0.4487 | 0.0811 | 4.16E-08 |
| <b>PGCB</b>                   | -0.4485 | 0.0815 | 4.89E-08 |
| <b>Ephrin A5</b>              | -0.4529 | 0.0825 | 5.19E-08 |
| <b>SEPR</b>                   | -0.4599 | 0.0838 | 5.24E-08 |
| <b>suPAR</b>                  | 0.4517  | 0.0829 | 6.53E-08 |
| <b>Cadherin E</b>             | 0.4591  | 0.0843 | 6.64E-08 |
| <b>RGMB</b>                   | -0.4350 | 0.0803 | 7.82E-08 |
| <b>OLR1</b>                   | 0.4595  | 0.0848 | 7.84E-08 |

---

Shown are the top 40 proteins listed by ascending *P*. See **Supplemental Table 1** for full protein names, Entrez Gene symbol, Entrez Gene ID and UniProt ID.

**Supplemental Table 14. Proteins associated with Framingham CHD Risk Score (age- and sex- adjusted)**

| <b>Protein</b>               | <b>FRS</b>                          |             |                 |
|------------------------------|-------------------------------------|-------------|-----------------|
|                              | <b>Estimated <math>\beta</math></b> | <b>S.E.</b> | <b><i>P</i></b> |
| <b>PAI 1</b>                 | 0.4840                              | 0.0327      | 1.63E-44        |
| <b>SHBG</b>                  | -0.4315                             | 0.0311      | 7.18E-40        |
| <b>tPA</b>                   | 0.4360                              | 0.0315      | 1.10E-39        |
| <b>Adiponectin</b>           | -0.4180                             | 0.0313      | 3.74E-37        |
| <b>TFPI</b>                  | 0.4022                              | 0.0329      | 6.40E-32        |
| <b>Endocan</b>               | -0.4084                             | 0.0336      | 1.46E-31        |
| <b>BMP 1</b>                 | 0.3826                              | 0.0322      | 2.91E-30        |
| <b>IGFBP 2</b>               | -0.3853                             | 0.0326      | 4.96E-30        |
| <b>Apo E</b>                 | 0.3900                              | 0.0333      | 1.65E-29        |
| <b>OMD</b>                   | -0.3754                             | 0.0325      | 7.55E-29        |
| <b>Apo E4</b>                | 0.3852                              | 0.0339      | 4.73E-28        |
| <b>SAP</b>                   | 0.3467                              | 0.0305      | 4.84E-28        |
| <b>Gelsolin</b>              | -0.3738                             | 0.0332      | 1.34E-27        |
| <b>TIMP 2</b>                | -0.3813                             | 0.0340      | 2.01E-27        |
| <b>CRP</b>                   | 0.3824                              | 0.0344      | 5.18E-27        |
| <b>NCAM 120</b>              | -0.3665                             | 0.0331      | 8.94E-27        |
| <b>Notch 3</b>               | -0.3678                             | 0.0343      | 2.61E-25        |
| <b>IGFBP 1</b>               | -0.3509                             | 0.0330      | 6.39E-25        |
| <b>bFGF R</b>                | -0.3567                             | 0.0336      | 7.51E-25        |
| <b>DKK3</b>                  | -0.3361                             | 0.0321      | 2.94E-24        |
| <b>Coagulation Factor IX</b> | 0.3546                              | 0.0340      | 4.79E-24        |

|                                |         |        |          |
|--------------------------------|---------|--------|----------|
| <b>Coagulation Factor IXab</b> | 0.3517  | 0.0339 | 7.74E-24 |
| <b>Growth hormone receptor</b> | 0.3502  | 0.0341 | 2.12E-23 |
| <b>Laminin</b>                 | 0.3272  | 0.0325 | 1.07E-22 |
| <b>PGCB</b>                    | -0.3347 | 0.0333 | 1.36E-22 |
| <b>MMP 2</b>                   | -0.3398 | 0.0339 | 1.87E-22 |
| <b>Aminoacylase 1</b>          | 0.3386  | 0.0339 | 2.54E-22 |
| <b>Factor I</b>                | 0.3307  | 0.0335 | 7.53E-22 |
| <b>Apo E3</b>                  | 0.3353  | 0.0352 | 1.37E-20 |
| <b>LG3BP</b>                   | 0.3167  | 0.0336 | 4.04E-20 |
| <b>Siglec 7</b>                | 0.3072  | 0.0341 | 1.28E-18 |
| <b>UNC5H4</b>                  | -0.3027 | 0.0336 | 1.34E-18 |
| <b>Antithrombin III</b>        | -0.2945 | 0.0329 | 2.02E-18 |
| <b>sE Selectin</b>             | 0.2984  | 0.0334 | 2.44E-18 |
| <b>TSG 6</b>                   | -0.3123 | 0.0352 | 3.72E-18 |
| <b>Factor H</b>                | 0.3048  | 0.0348 | 9.90E-18 |
| <b>IGFBP 4</b>                 | 0.3101  | 0.0356 | 1.60E-17 |
| <b>ESAM</b>                    | -0.2793 | 0.0322 | 2.12E-17 |
| <b>Carbonic anhydrase 6</b>    | -0.2767 | 0.0321 | 3.08E-17 |
| <b>RGMB</b>                    | -0.2858 | 0.0332 | 3.42E-17 |
| <b>WFKN2</b>                   | -0.2845 | 0.0332 | 4.66E-17 |
| <b>TIG2</b>                    | 0.2846  | 0.0333 | 5.71E-17 |
| <b>Heparin cofactor II</b>     | 0.2989  | 0.0351 | 6.61E-17 |
| <b>IDS</b>                     | -0.2895 | 0.0342 | 9.73E-17 |
| <b>Galectin 4</b>              | 0.2876  | 0.0340 | 1.20E-16 |
| <b>MMP 12</b>                  | 0.2537  | 0.0306 | 3.93E-16 |

|                    |         |        |          |
|--------------------|---------|--------|----------|
| <b>Leptin</b>      | 0.2303  | 0.0280 | 6.46E-16 |
| <b>Notch 1</b>     | -0.2765 | 0.0336 | 7.00E-16 |
| <b>EphB6</b>       | -0.2702 | 0.0331 | 1.15E-15 |
| <b>CHL1</b>        | -0.2791 | 0.0345 | 2.00E-15 |
| <b>C5a</b>         | 0.2846  | 0.0353 | 2.43E-15 |
| <b>SLIK5</b>       | -0.2687 | 0.0335 | 3.49E-15 |
| <b>TGF b R III</b> | -0.2764 | 0.0346 | 4.17E-15 |
| <b>KYNU</b>        | 0.2666  | 0.0336 | 6.09E-15 |
| <b>C1s</b>         | 0.2738  | 0.0347 | 8.47E-15 |
| <b>Ficolin 3</b>   | 0.2727  | 0.0347 | 1.18E-14 |
| <b>Protein S</b>   | 0.2635  | 0.0343 | 3.82E-14 |
| <b>PIGR</b>        | 0.2712  | 0.0354 | 4.66E-14 |
| <b>BSP</b>         | -0.2704 | 0.0360 | 1.50E-13 |
| <b>RGM C</b>       | -0.2571 | 0.0345 | 2.09E-13 |
| <b>ROR1</b>        | -0.2534 | 0.0341 | 2.52E-13 |
| <b>Afamin</b>      | 0.2629  | 0.0355 | 3.06E-13 |
| <b>NRP1</b>        | -0.2530 | 0.0345 | 4.74E-13 |
| <b>EMAP 2</b>      | 0.2425  | 0.0335 | 9.52E-13 |
| <b>sL Selectin</b> | -0.2385 | 0.0334 | 1.86E-12 |
| <b>Calpastatin</b> | -0.2480 | 0.0350 | 2.86E-12 |
| <b>Apo E2</b>      | 0.2571  | 0.0365 | 3.66E-12 |
| <b>MIA</b>         | -0.2464 | 0.0355 | 7.85E-12 |
| <b>IL 1 R AcP</b>  | -0.2346 | 0.0339 | 9.14E-12 |
| <b>Factor B</b>    | 0.2414  | 0.0350 | 9.54E-12 |
| <b>ENPP7</b>       | 0.2403  | 0.0352 | 1.56E-11 |

|                       |         |        |          |
|-----------------------|---------|--------|----------|
| <b>TrkC</b>           | -0.2323 | 0.0345 | 3.10E-11 |
| <b>TSP2</b>           | 0.2307  | 0.0344 | 3.57E-11 |
| <b>Transferrin</b>    | -0.2265 | 0.0338 | 3.70E-11 |
| <b>MDC</b>            | 0.2245  | 0.0336 | 4.01E-11 |
| <b>IL 18 Ra</b>       | 0.2313  | 0.0349 | 6.01E-11 |
| <b>WISP 1</b>         | 0.2288  | 0.0350 | 1.04E-10 |
| <b>Cystatin M</b>     | -0.2068 | 0.0318 | 1.22E-10 |
| <b>SDF 1</b>          | -0.2347 | 0.0361 | 1.33E-10 |
| <b>sRAGE</b>          | -0.2237 | 0.0345 | 1.45E-10 |
| <b>AK1A1</b>          | 0.2168  | 0.0345 | 4.88E-10 |
| <b>Cadherin E</b>     | 0.2235  | 0.0356 | 5.60E-10 |
| <b>Cadherin 5</b>     | -0.2199 | 0.0351 | 5.85E-10 |
| <b>BOC</b>            | -0.2146 | 0.0343 | 6.02E-10 |
| <b>Periostin</b>      | -0.2148 | 0.0343 | 6.27E-10 |
| <b>Sonic Hedgehog</b> | -0.2185 | 0.0350 | 6.38E-10 |
| <b>NADPH P450</b>     |         |        |          |
| <b>Oxidoreductase</b> | 0.2190  | 0.0351 | 6.50E-10 |
| <b>contactin 1</b>    | -0.2361 | 0.0378 | 6.59E-10 |
| <b>NET4</b>           | 0.2123  | 0.0347 | 1.36E-09 |
| <b>AMPM2</b>          | 0.2175  | 0.0358 | 1.83E-09 |
| <b>HDGR2</b>          | 0.2111  | 0.0350 | 2.44E-09 |
| <b>WIF 1</b>          | -0.2113 | 0.0351 | 2.67E-09 |
| <b>IGFBP 6</b>        | -0.1894 | 0.0316 | 2.84E-09 |
| <b>6Ckine</b>         | 0.2046  | 0.0341 | 2.86E-09 |
| <b>CYTT</b>           | -0.2045 | 0.0343 | 3.72E-09 |



|                               |         |        |          |
|-------------------------------|---------|--------|----------|
| <b>IL 1 sRI</b>               | -0.2094 | 0.0352 | 3.82E-09 |
| <b>LSAMP</b>                  | -0.1739 | 0.0294 | 4.53E-09 |
| <b>PHI</b>                    | 0.2079  | 0.0355 | 6.66E-09 |
| <b>Glypican 3</b>             | -0.2021 | 0.0347 | 7.73E-09 |
| <b>Met</b>                    | -0.2099 | 0.0360 | 8.06E-09 |
| <b>NRX3B</b>                  | -0.2025 | 0.0349 | 9.46E-09 |
| <b>CYTN</b>                   | -0.2025 | 0.0351 | 1.11E-08 |
| <b>RET</b>                    | 0.1955  | 0.0343 | 1.59E-08 |
| <b>Ephrin A5</b>              | -0.1987 | 0.0350 | 1.81E-08 |
| <b>FCN2</b>                   | 0.2010  | 0.0354 | 1.91E-08 |
| <b>a1 Antitrypsin</b>         | -0.1998 | 0.0353 | 1.98E-08 |
| <b>HSP 90a b</b>              | 0.2015  | 0.0356 | 1.99E-08 |
| <b>MDHC</b>                   | 0.1912  | 0.0338 | 2.05E-08 |
| <b>Cathepsin S</b>            | 0.1973  | 0.0350 | 2.37E-08 |
| <b>C3b</b>                    | 0.1990  | 0.0355 | 2.85E-08 |
| <b>Nogo Receptorz</b>         | 0.2017  | 0.0360 | 2.89E-08 |
| <b>Rab GDP dissoc inhib b</b> | 0.1953  | 0.0351 | 3.56E-08 |
| <b>Angiopietin 2</b>          | 0.1893  | 0.0343 | 4.33E-08 |
| <b>HCC 4</b>                  | 0.1899  | 0.0345 | 4.80E-08 |
| <b>GNS</b>                    | 0.1949  | 0.0357 | 6.42E-08 |
| <b>MMP 7</b>                  | 0.1735  | 0.0320 | 7.41E-08 |
| <b>LYVE1</b>                  | -0.1906 | 0.0355 | 1.03E-07 |
| <b>Cathepsin D</b>            | 0.1944  | 0.0363 | 1.06E-07 |
| <b>ARMEL</b>                  | -0.1828 | 0.0341 | 1.07E-07 |
| <b>RTN4</b>                   | -0.1871 | 0.0351 | 1.25E-07 |

|                              |         |        |          |
|------------------------------|---------|--------|----------|
| <b>SLPI</b>                  | 0.1905  | 0.0359 | 1.39E-07 |
| <b>a1 Antichymotrypsin</b>   | -0.1881 | 0.0357 | 1.74E-07 |
| <b>LY86</b>                  | -0.1816 | 0.0345 | 1.76E-07 |
| <b>UNC5H3</b>                | -0.1728 | 0.0331 | 2.25E-07 |
| <b>HSP 70</b>                | 0.1832  | 0.0353 | 2.52E-07 |
| <b>Apo D</b>                 | 0.1872  | 0.0361 | 2.70E-07 |
| <b>CATZ</b>                  | 0.1801  | 0.0347 | 2.70E-07 |
| <b>PARC</b>                  | 0.1735  | 0.0335 | 2.82E-07 |
| <b>TECK</b>                  | 0.1839  | 0.0356 | 2.85E-07 |
| <b>IL 17B R</b>              | -0.1791 | 0.0347 | 3.14E-07 |
| <b>C2</b>                    | 0.1754  | 0.0341 | 3.29E-07 |
| <b>IgG</b>                   | -0.1801 | 0.0351 | 3.49E-07 |
| <b>Coagulation Factor X</b>  | 0.1723  | 0.0344 | 6.45E-07 |
| <b>CNTFR alpha</b>           | -0.1736 | 0.0347 | 6.87E-07 |
| <b>hnRNP A2 B1</b>           | 0.1735  | 0.0351 | 9.43E-07 |
| <b>sCD163</b>                | 0.1696  | 0.0346 | 1.10E-06 |
| <b>ECM1</b>                  | -0.1722 | 0.0351 | 1.13E-06 |
| <b>C3</b>                    | 0.1750  | 0.0358 | 1.20E-06 |
| <b>Soggy 1</b>               | 0.1737  | 0.0356 | 1.28E-06 |
| <b>BMPR1A</b>                | -0.1767 | 0.0363 | 1.34E-06 |
| <b>GFRa 1</b>                | 0.1729  | 0.0359 | 1.67E-06 |
| <b>AIP</b>                   | 0.1679  | 0.0352 | 2.15E-06 |
| <b>TrATPase</b>              | 0.1653  | 0.0350 | 2.63E-06 |
| <b>ERBB1</b>                 | -0.1483 | 0.0314 | 2.69E-06 |
| <b>Coagulation Factor Xa</b> | 0.1605  | 0.0340 | 2.70E-06 |

|                                  |         |        |          |
|----------------------------------|---------|--------|----------|
| <b>Desmoglein 2</b>              | -0.1630 | 0.0346 | 2.82E-06 |
| <b>CRDL1</b>                     | -0.1530 | 0.0325 | 2.97E-06 |
| <b>BCMA</b>                      | -0.1604 | 0.0341 | 3.03E-06 |
| <b>AMHR2</b>                     | -0.1647 | 0.0351 | 3.23E-06 |
| <b>IGFBP 5</b>                   | -0.1567 | 0.0335 | 3.31E-06 |
| <b>Contactin 5</b>               | -0.1650 | 0.0354 | 3.72E-06 |
| <b>Amyloid Precursor Protein</b> |         |        |          |
| <b>Protein</b>                   | -0.1645 | 0.0356 | 4.34E-06 |
| <b>Dkk 4</b>                     | -0.1517 | 0.0328 | 4.34E-06 |
| <b>RSPO2</b>                     | 0.1706  | 0.0371 | 4.83E-06 |
| <b>Semaphorin 3E</b>             | -0.1626 | 0.0354 | 5.07E-06 |
| <b>PDGF Rb</b>                   | -0.1635 | 0.0357 | 5.46E-06 |

---

Shown are all proteins with  $P < 5.54E-06$ , listed by ascending  $P$ . See **Supplemental Table 1** for full protein names, Entrez Gene Symbol, Entrez Gene ID and UniProt ID.

**Supplemental Table 15. Proteins associated with incident CVD (age- and sex-adjusted,  $P < 0.05$ )**

| <b>Protein</b>        | <b>HR</b><br>per s.d. | <b>CI</b>    | <b>P</b> |
|-----------------------|-----------------------|--------------|----------|
| tPA                   | 1.65                  | (1.31- 2.07) | 2.13E-05 |
| Cathepsin H           | 1.47                  | (1.21-1.79)  | 1.27E-04 |
| NCAM 120              | 0.68                  | (0.55-0.83)  | 2.46E-04 |
| IDS                   | 0.69                  | (0.56-0.85)  | 3.94E-04 |
| C1s                   | 1.42                  | (1.17-1.73)  | 5.08E-04 |
| IGFBP 4               | 1.48                  | (1.18-1.86)  | 7.79E-04 |
| Coagulation Factor IX | 1.45                  | (1.15-1.82)  | 1.38E-03 |
| MMP 7                 | 1.35                  | (1.11-1.63)  | 2.07E-03 |
| ERBB1                 | 0.71                  | (0.56-0.89)  | 2.82E-03 |
| Angiopoietin 2        | 1.36                  | (1.11-1.65)  | 2.87E-03 |
| NPS PLA2              | 1.37                  | (1.11-1.70)  | 3.17E-03 |
| TNF sR I              | 1.33                  | (1.10-1.61)  | 3.41E-03 |
| Gelsolin              | 0.76                  | (0.63-0.91)  | 3.47E-03 |
| CRP                   | 1.41                  | (1.12-1.79)  | 3.60E-03 |
| Transferrin           | 0.74                  | (0.60-0.91)  | 3.81E-03 |
| TSP2                  | 1.32                  | (1.09-1.60)  | 4.27E-03 |
| sRAGE                 | 0.73                  | (0.58-0.90)  | 4.30E-03 |
| MMP 12                | 1.38                  | (1.11-1.73)  | 4.30E-03 |
| Galectin 4            | 1.23                  | (1.07-1.42)  | 4.39E-03 |
| sE Selectin           | 1.37                  | (1.10-1.69)  | 4.39E-03 |
| TrkC                  | 0.73                  | (0.59-0.91)  | 5.07E-03 |

|                           |      |             |          |
|---------------------------|------|-------------|----------|
| prostatic binding protein | 1.40 | (1.10-1.78) | 5.89E-03 |
| Cathepsin S               | 1.28 | (1.07-1.53) | 6.27E-03 |
| MMP 2                     | 0.76 | (0.63-0.93) | 6.43E-03 |
| SPARCL1                   | 0.74 | (0.60-0.92) | 6.46E-03 |
| UNC5H4                    | 0.74 | (0.60-0.92) | 6.48E-03 |
| Siglec 7                  | 1.31 | (1.08-1.59) | 7.10E-03 |
| OMD                       | 0.76 | (0.62-0.93) | 7.41E-03 |
| LRP8                      | 0.69 | (0.53-0.91) | 8.20E-03 |
| Mn SOD                    | 0.75 | (0.61-0.93) | 8.81E-03 |
| ERP29                     | 1.32 | (1.07-1.63) | 9.39E-03 |
| IGFBP 7                   | 1.32 | (1.07-1.62) | 9.57E-03 |
| MDC                       | 1.26 | (1.06-1.50) | 9.65E-03 |
| WFKN2                     | 0.76 | (0.61-0.94) | 1.10E-02 |
| PERL                      | 1.26 | (1.05-1.51) | 1.11E-02 |
| Ubiquitin 1               | 1.30 | (1.06-1.59) | 1.16E-02 |
| C2                        | 1.35 | (1.06-1.71) | 1.38E-02 |
| AK1A1                     | 1.30 | (1.05-1.60) | 1.44E-02 |
| IL 18 Ra                  | 1.29 | (1.05-1.58) | 1.48E-02 |
| KYNU                      | 1.28 | (1.05-1.57) | 1.50E-02 |
| b2 Microglobulin          | 1.25 | (1.04-1.49) | 1.55E-02 |
| TSG 6                     | 0.78 | (0.63-0.95) | 1.60E-02 |
| PAI 1                     | 1.27 | (1.04-1.55) | 1.70E-02 |
| LG3BP                     | 1.26 | (1.04-1.53) | 1.80E-02 |
| Laminin                   | 1.29 | (1.04-1.60) | 1.84E-02 |
| RGM C                     | 0.78 | (0.63-0.96) | 1.93E-02 |
| SLIK5                     | 0.76 | (0.61-0.96) | 2.06E-02 |

|                              |      |             |          |
|------------------------------|------|-------------|----------|
| Aminoacylase 1               | 1.27 | (1.04-1.56) | 2.10E-02 |
| bFGF R                       | 0.79 | (0.65-0.97) | 2.11E-02 |
| Peroxiredoxin 1              | 1.23 | (1.03-1.48) | 2.21E-02 |
| Rab GDP dissoc inhib b       | 1.27 | (1.03-1.55) | 2.27E-02 |
| Met                          | 0.84 | (0.72-0.98) | 2.28E-02 |
| Factor H                     | 1.28 | (1.03-1.59) | 2.58E-02 |
| UBE2N                        | 1.25 | (1.03-1.53) | 2.70E-02 |
| CLM6                         | 1.26 | (1.03-1.54) | 2.75E-02 |
| Cystatin C                   | 1.28 | (1.03-1.59) | 2.82E-02 |
| FSTL3                        | 1.28 | (1.03-1.59) | 2.92E-02 |
| PGCB                         | 0.78 | (0.63-0.98) | 3.05E-02 |
| Ephrin A4                    | 1.22 | (1.02-1.46) | 3.11E-02 |
| Myokinase human              | 1.27 | (1.02-1.59) | 3.22E-02 |
| TYK2                         | 1.23 | (1.02-1.48) | 3.38E-02 |
| Antithrombin III             | 0.80 | (0.66-0.98) | 3.39E-02 |
| Phosphoglycerate mutase<br>1 | 0.79 | (0.63-0.98) | 3.45E-02 |
| EMAP 2                       | 1.24 | (1.02-1.51) | 3.52E-02 |
| Myoglobin                    | 0.76 | (0.59-0.99) | 3.79E-02 |
| eIF 5                        | 1.18 | (1.01-1.39) | 3.87E-02 |
| TNF sR II                    | 1.23 | (1.01-1.49) | 4.08E-02 |
| Prothrombin                  | 0.80 | (0.65-0.99) | 4.16E-02 |
| AREG                         | 1.23 | (1.01-1.50) | 4.26E-02 |
| Kallikrein 11                | 0.78 | (0.61-0.99) | 4.27E-02 |
| TIMD3                        | 1.23 | (1.01-1.51) | 4.31E-02 |
| Cadherin E                   | 1.23 | (1.01-1.51) | 4.34E-02 |

|           |      |             |          |
|-----------|------|-------------|----------|
| CK2 A1 B  | 1.23 | (1.00-1.50) | 4.74E-02 |
| TIMP 2    | 0.81 | (0.65-1.00) | 4.78E-02 |
| TIG2      | 1.19 | (1.00-1.41) | 4.94E-02 |
| Ubiquitin | 1.20 | (1.00-1.43) | 4.96E-02 |
| CTGF      | 1.22 | (1.00-1.49) | 4.97E-02 |

---

Shown are proteins with  $P < 0.05$ , listed by ascending  $P$ . Values are hazard ratios per standard deviation (95% confidence intervals) for incident CVD from proportional hazards regression models. See Supplemental Table 1 for full protein names, Entrez Gene symbol/ID and UniProt ID.

**Supplemental Table 16. Peptides from the 29 target proteins detected by LC-MS/MS after aptamer affinity enrichment**

| No | Uniprot | Protein Name                         | Sequence                        |
|----|---------|--------------------------------------|---------------------------------|
| 1  | Q9UQ80  | Proliferation-associated protein 2G4 | KADVIK                          |
| 2  | Q9UQ80  | Proliferation-associated protein 2G4 | DAGQRRTTIYK                     |
| 3  | Q9UQ80  | Proliferation-associated protein 2G4 | YKMGGDIANR                      |
| 4  | Q9UQ80  | Proliferation-associated protein 2G4 | EGDLVK                          |
| 5  | Q9UQ80  | Proliferation-associated protein 2G4 | MGGDIANRVLR                     |
| 6  | Q9UQ80  | Proliferation-associated protein 2G4 | AFFSEVERR                       |
| 7  | Q9UQ80  | Proliferation-associated protein 2G4 | TSRAFFSEVER                     |
| 8  | Q9UQ80  | Proliferation-associated protein 2G4 | KGIAPPTSISVNNCVCHFSPKSDQDYILK   |
| 9  | Q9UQ80  | Proliferation-associated protein 2G4 | SDQDYILK                        |
| 10 | Q9UQ80  | Proliferation-associated protein 2G4 | RFDAMPFTLR                      |
| 11 | Q9UQ80  | Proliferation-associated protein 2G4 | MGGDIANR                        |
| 12 | Q9UQ80  | Proliferation-associated protein 2G4 | AFFSEVER                        |
| 13 | Q9UQ80  | Proliferation-associated protein 2G4 | ALLQSSASRK                      |
| 14 | Q9UQ80  | Proliferation-associated protein 2G4 | FDAMPFTLR                       |
| 15 | Q9UQ80  | Proliferation-associated protein 2G4 | GDAMIMEETGK                     |
| 16 | Q9UQ80  | Proliferation-associated protein 2G4 | EGEFVAQFK                       |
| 17 | Q9UQ80  | Proliferation-associated protein 2G4 | ALLQSSASR                       |
| 18 | Q9UQ80  | Proliferation-associated protein 2G4 | FTVLLMPNGPMR                    |
| 19 | Q9UQ80  | Proliferation-associated protein 2G4 | DPSKQYGLK                       |
| 20 | Q9UQ80  | Proliferation-associated protein 2G4 | TIIQNPTDQQKK                    |
| 21 | Q9UQ80  | Proliferation-associated protein 2G4 | SEMEVQDAELK                     |
| 22 | Q9UQ80  | Proliferation-associated protein 2G4 | TIIQNPTDQQK                     |
| 23 | Q9UQ80  | Proliferation-associated protein 2G4 | MGVVECAK                        |
| 24 | Q9UQ80  | Proliferation-associated protein 2G4 | HELLQPFNVLYEKEGEFVAQFK          |
| 25 | Q9UQ80  | Proliferation-associated protein 2G4 | VAHSFNCTPIEGMLSHQLK             |
| 26 | Q9UQ80  | Proliferation-associated protein 2G4 | GIAFPTSISVNNCVCHFSPKSDQDYILK    |
| 27 | Q9UQ80  | Proliferation-associated protein 2G4 | ITSGPFEPDLYK                    |
| 28 | Q9UQ80  | Proliferation-associated protein 2G4 | AAHLCAEAALR                     |
| 29 | Q9UQ80  | Proliferation-associated protein 2G4 | GIAFPTSISVNNCVCHFSPK            |
| 30 | Q9UQ80  | Proliferation-associated protein 2G4 | LVKPGNQNTQVTEAWNK               |
| 31 | Q9UQ80  | Proliferation-associated protein 2G4 | SLVEASSSGVSVLSLCEK              |
| 32 | Q9UQ80  | Proliferation-associated protein 2G4 | MSGEDEQQEQTIAEDLVVTK            |
| 33 | Q9UQ80  | Proliferation-associated protein 2G4 | HELLQPFNVLYEK                   |
| 34 | Q9UQ80  | Proliferation-associated protein 2G4 | AEFEVHEVYAVDVLVSSGEGK           |
| 35 | Q9UQ80  | Proliferation-associated protein 2G4 | ITSGPFEPDLYKSEMEVQDAELK         |
| 36 | Q9UQ80  | Proliferation-associated protein 2G4 | KGIAPPTSISVNNCVCHFSPK           |
| 37 | Q9UQ80  | Proliferation-associated protein 2G4 | IDLGVHVDGFIANVAHTFVVDVAQGTQVTGR |
| 38 | P00533  | Epidermal growth factor receptor     | TCPAGVMGENNTLVWK                |
| 39 | P00533  | Epidermal growth factor receptor     | NYDLSFLK                        |
| 40 | P00533  | Epidermal growth factor receptor     | TGLKELPMR                       |
| 41 | P00533  | Epidermal growth factor receptor     | LFGTSGQK                        |
| 42 | P00533  | Epidermal growth factor receptor     | KVCNGIGIGEFK                    |
| 43 | P00533  | Epidermal growth factor receptor     | ESDCLVCR                        |
| 44 | P00533  | Epidermal growth factor receptor     | KLFGTSGQK                       |
| 45 | P00533  | Epidermal growth factor receptor     | GKSPSDCCHNQCAAGCTGPR            |
| 46 | P00533  | Epidermal growth factor receptor     | GDSFTHTPPLDPQELDILKTVK          |
| 47 | P00533  | Epidermal growth factor receptor     | YSFGATCVK                       |



|    |          |                                        |                        |
|----|----------|----------------------------------------|------------------------|
| 48 | P00533   | Epidermal growth factor receptor       | EISDGDVIISGNK          |
| 49 | P00533   | Epidermal growth factor receptor       | SLKEISDGDVIISGNK       |
| 50 | P00533   | Epidermal growth factor receptor       | VCNGIGIGEFK            |
| 51 | P00533   | Epidermal growth factor receptor       | NLQEILHGAVR            |
| 52 | P00533   | Epidermal growth factor receptor       | NLCYANTINWK            |
| 53 | P00533   | Epidermal growth factor receptor       | ELPMRNLQEILHGAVR       |
| 54 | P00533   | Epidermal growth factor receptor       | IPLNLQIIR              |
| 55 | P00533   | Epidermal growth factor receptor       | GNMYEENSALAVLSNYDANK   |
| 56 | P00533   | Epidermal growth factor receptor       | IICAQQCSGR             |
| 57 | P00533   | Epidermal growth factor receptor       | ACGADSYEMEEDGVR        |
| 58 | P00533   | Epidermal growth factor receptor       | FSNNPALCNVESIQWR       |
| 59 | P00533   | Epidermal growth factor receptor       | NYVVTDHGSCVR           |
| 60 | P00533   | Epidermal growth factor receptor       | GDSFTHTPPLDPQELDILK    |
| 61 | P00533   | Epidermal growth factor receptor       | ACGADSYEMEEDGVRK       |
| 62 | P00533   | Epidermal growth factor receptor       | TDLHAFENLEIIR          |
| 63 | P00533   | Epidermal growth factor receptor       | SPSDCCHNQCAAGCTGPR     |
| 64 | P00533   | Epidermal growth factor receptor       | DTCPLMLYNPTTYQMDVNPEGK |
| 65 | P00533   | Epidermal growth factor receptor       | LTQLGTFEDHFLSLQR       |
| 66 | P00533   | Epidermal growth factor receptor       | CDPSCPNGSCWGAGEENCQK   |
| 67 | P00533   | Epidermal growth factor receptor       | TIQEVAGYVLIALNTVER     |
| 68 | P00533   | Epidermal growth factor receptor       | GPDNCIQCAHYIDGPHCVK    |
| 69 | P00533   | Epidermal growth factor receptor       | ATGQVCHALCSPEGCWGPEPR  |
| 70 | P09493-4 | Isoform 4 of Tropomyosin alpha-1 chain | YEEEEIK                |
| 71 | P09493-4 | Isoform 4 of Tropomyosin alpha-1 chain | LATALQKLEEAEK          |
| 72 | P09493-4 | Isoform 4 of Tropomyosin alpha-1 chain | KMQMLK                 |
| 73 | P09493-4 | Isoform 4 of Tropomyosin alpha-1 chain | LVIIESDLER             |
| 74 | P09493-4 | Isoform 4 of Tropomyosin alpha-1 chain | GTEDELDKYSEALKDAQEK    |
| 75 | P09493-4 | Isoform 4 of Tropomyosin alpha-1 chain | AEERAELSEGQVR          |
| 76 | P09493-4 | Isoform 4 of Tropomyosin alpha-1 chain | HIAEDADRK              |
| 77 | P09493-4 | Isoform 4 of Tropomyosin alpha-1 chain | IMDQTLK                |
| 78 | P09493-4 | Isoform 4 of Tropomyosin alpha-1 chain | AEFAER                 |
| 79 | P09493-4 | Isoform 4 of Tropomyosin alpha-1 chain | HIAEDADR               |
| 80 | P09493-4 | Isoform 4 of Tropomyosin alpha-1 chain | QLEEQLR                |
| 81 | P09493-4 | Isoform 4 of Tropomyosin alpha-1 chain | AELSEGQVR              |
| 82 | P09493-4 | Isoform 4 of Tropomyosin alpha-1 chain | ATDAEADVASLNRR         |
| 83 | P09493-4 | Isoform 4 of Tropomyosin alpha-1 chain | EDRYEEEEIK             |
| 84 | P09493-4 | Isoform 4 of Tropomyosin alpha-1 chain | AAEDRSKQLEDELVSLQK     |
| 85 | P09493-4 | Isoform 4 of Tropomyosin alpha-1 chain | LDKENALDR              |
| 86 | P09493-4 | Isoform 4 of Tropomyosin alpha-1 chain | KATDAEADVASLNRR        |

|     |          |                                                 |                  |
|-----|----------|-------------------------------------------------|------------------|
| 87  | P09493-4 | chain<br>Isoform 4 of Tropomyosin alpha-1 chain | ALMAAEDK         |
| 88  | P09493-4 | chain<br>Isoform 4 of Tropomyosin alpha-1 chain | AQKDEEKMEIQEIQLK |
| 89  | P09493-4 | chain<br>Isoform 4 of Tropomyosin alpha-1 chain | LATALQK          |
| 90  | P09493-4 | chain<br>Isoform 4 of Tropomyosin alpha-1 chain | IQLVEEELDRAQER   |
| 91  | P09493-4 | chain<br>Isoform 4 of Tropomyosin alpha-1 chain | LKGTEDELDKYSEALK |
| 92  | P09493-4 | chain<br>Isoform 4 of Tropomyosin alpha-1 chain | EAETRAEFAER      |
| 93  | P09493-4 | chain<br>Isoform 4 of Tropomyosin alpha-1 chain | YSEALKDAQEK      |
| 94  | P09493-4 | chain<br>Isoform 4 of Tropomyosin alpha-1 chain | ALMAAEDKYSQKEDR  |
| 95  | P09493-4 | chain<br>Isoform 4 of Tropomyosin alpha-1 chain | QLEDELVSLQK      |
| 96  | P09493-4 | chain<br>Isoform 4 of Tropomyosin alpha-1 chain | IQLVEEELDR       |
| 97  | P09493-4 | chain<br>Isoform 4 of Tropomyosin alpha-1 chain | ALMAAEDKYSQK     |
| 98  | P09493-4 | chain<br>Isoform 4 of Tropomyosin alpha-1 chain | KATDAEADVASLNR   |
| 99  | P09493-4 | chain<br>Isoform 4 of Tropomyosin alpha-1 chain | AISEELDHALNDMTSI |
| 100 | P09493-4 | chain<br>Isoform 4 of Tropomyosin alpha-1 chain | KLVIIESDLER      |
| 101 | P09493-4 | chain<br>Isoform 4 of Tropomyosin alpha-1 chain | ATDAEADVASLNR    |
| 102 | P09493-4 | chain<br>Isoform 4 of Tropomyosin alpha-1 chain | LEKSIDDLEDELYAQK |
| 103 | P09493-4 | chain<br>Isoform 4 of Tropomyosin alpha-1 chain | DAQEKLELAEK      |
| 104 | P09493-4 | chain<br>Isoform 4 of Tropomyosin alpha-1 chain | SIDDLEDELYAQK    |
| 105 | P09493-4 | chain<br>Isoform 4 of Tropomyosin alpha-1 chain | SKQLEDELVSLQK    |
| 106 | P09493-4 | chain<br>Isoform 4 of Tropomyosin alpha-1 chain | YSQKEDRYEEEEIK   |
| 107 | P09493-4 | chain<br>Isoform 4 of Tropomyosin alpha-1 chain | RIQLVEEELDR      |
| 108 | P09493-4 | chain<br>Isoform 4 of Tropomyosin alpha-1 chain | GTEDELDKYSEALK   |
| 109 | P09493-4 | chain<br>Isoform 4 of Tropomyosin alpha-1 chain | LEEAEKAADESER    |
| 110 | P67936   | Tropomyosin alpha-4 chain                       | YSEKEDKYEEEEIK   |
| 111 | P67936   | Tropomyosin alpha-4 chain                       | EKAEGDVAALNR     |
| 112 | P67936   | Tropomyosin alpha-4 chain                       | IQALQQQADEAEDR   |
| 113 | P06753-6 | chain<br>Isoform 6 of Tropomyosin alpha-3 chain | IQVLQQQADDAEER   |
| 114 | Q5TCU8   | Tropomyosin beta chain                          | LDKENAIDR        |
| 115 | Q5TCU8   | Tropomyosin beta chain                          | KLVILEGELER      |
| 116 | P14618   | Pyruvate kinase PKM                             | SGMNVAR          |
| 117 | P14618   | Pyruvate kinase PKM                             | VNFAMNVGK        |

|     |        |                                          |                           |
|-----|--------|------------------------------------------|---------------------------|
| 118 | P14618 | Pyruvate kinase PKM                      | VFLAQK                    |
| 119 | P14618 | Pyruvate kinase PKM                      | DIQDLK                    |
| 120 | P14618 | Pyruvate kinase PKM                      | MQHLIAR                   |
| 121 | P14618 | Pyruvate kinase PKM                      | SVETLK                    |
| 122 | P14618 | Pyruvate kinase PKM                      | GSGTAEVELK                |
| 123 | P14618 | Pyruvate kinase PKM                      | GIFPVLCK                  |
| 124 | P14618 | Pyruvate kinase PKM                      | GDYPLEAVR                 |
| 125 | P14618 | Pyruvate kinase PKM                      | GVNLPGAAVDLPVSEKDIQDLK    |
| 126 | P14618 | Pyruvate kinase PKM                      | LDIDSPPITAR               |
| 127 | P14618 | Pyruvate kinase PKM                      | APIIAVTR                  |
| 128 | P14618 | Pyruvate kinase PKM                      | IYVDDGLISLQVK             |
| 129 | P14618 | Pyruvate kinase PKM                      | CDENILWLDYK               |
| 130 | P14618 | Pyruvate kinase PKM                      | ITLDNAYMEK                |
| 131 | P14618 | Pyruvate kinase PKM                      | GSGTAEVELKK               |
| 132 | P14618 | Pyruvate kinase PKM                      | CCSGAIIVLTK               |
| 133 | P14618 | Pyruvate kinase PKM                      | KGVNLPGAAVDLPVSEK         |
| 134 | P14618 | Pyruvate kinase PKM                      | KASDVHEVR                 |
| 135 | P14618 | Pyruvate kinase PKM                      | NTGIICTIGPASR             |
| 136 | P14618 | Pyruvate kinase PKM                      | GDLGIEIPA EK              |
| 137 | P14618 | Pyruvate kinase PKM                      | KGVNLPGAAVDLPVSEKDIQDLK   |
| 138 | P14618 | Pyruvate kinase PKM                      | GVNLPGAAVDLPVSEK          |
| 139 | P14618 | Pyruvate kinase PKM                      | TATESFASDPILYRPVAVALDTK   |
| 140 | P14618 | Pyruvate kinase PKM                      | LAPITSDPTEATAVGAVEASFK    |
| 141 | P14618 | Pyruvate kinase PKM                      | LNFSHGTHEYHAETIK          |
| 142 | P14618 | Pyruvate kinase PKM                      | KGDVVIVLTGWRPGSGFTNTMR    |
| 143 | P14618 | Pyruvate kinase PKM                      | GADFLVTEVENGGSLGSK        |
| 144 | P14618 | Pyruvate kinase PKM                      | AEGSDVANAVLDGADCIMLSGETAK |
| 145 | P14618 | Pyruvate kinase PKM                      | FGVEQDVMVFASFIR           |
| 146 | P14618 | Pyruvate kinase PKM                      | AGKPVICATQMLESMIK         |
| 147 | P14618 | Pyruvate kinase PKM                      | EAEAAIYHLQLFEELRR         |
| 148 | P14618 | Pyruvate kinase PKM                      | GIFPVLCKDPVQEAWAEDVDLR    |
| 149 | P14618 | Pyruvate kinase PKM                      | RFDEILEASDGIMVAR          |
| 150 | P14618 | Pyruvate kinase PKM                      | EAEAAIYHLQLFEELR          |
| 151 | P06576 | ATP synthase subunit beta, mitochondrial | ILQDYK                    |
| 152 | P06576 | ATP synthase subunit beta, mitochondrial | LVPLKETIK                 |
| 153 | P06576 | ATP synthase subunit beta, mitochondrial | TIAMDGTEGLVR              |
| 154 | P06576 | ATP synthase subunit beta, mitochondrial | VLDSGAPIK                 |
| 155 | P06576 | ATP synthase subunit beta, mitochondrial | IMNVIGEPIDER              |
| 156 | P06576 | ATP synthase subunit beta, mitochondrial | VVDLLAPYAK                |
| 157 | P06576 | ATP synthase subunit beta, mitochondrial | IGLFGGAGVGK               |
| 158 | P06576 | ATP synthase subunit beta, mitochondrial | AHGGYSVFAGVGER            |
| 159 | P06576 | ATP synthase subunit beta, mitochondrial | TVLIMELINNVAK             |
| 160 | P06576 | ATP synthase subunit beta, mitochondrial | FLSQPFQVAEVFTGHMGK        |
| 161 | P06576 | ATP synthase subunit beta,               | VALVYGQMNEPPGAR           |

|     |        |                                                              |                                      |
|-----|--------|--------------------------------------------------------------|--------------------------------------|
| 162 | P06576 | mitochondrial<br>ATP synthase subunit beta,<br>mitochondrial | IPVGPETLGR                           |
| 163 | P06576 | ATP synthase subunit beta,<br>mitochondrial                  | VALTGLTVAEYFR                        |
| 164 | P06576 | ATP synthase subunit beta,<br>mitochondrial                  | FTQAGSEVSALLGR                       |
| 165 | P06576 | ATP synthase subunit beta,<br>mitochondrial                  | AIAELGIYPAVDPLDSTSR                  |
| 166 | P06576 | ATP synthase subunit beta,<br>mitochondrial                  | GSITSVQAIYVPADDLTDPAATTFAHLDATTVLSR  |
| 167 | P06576 | ATP synthase subunit beta,<br>mitochondrial                  | TREGNDLYHEMIESGVINLK                 |
| 168 | P06576 | ATP synthase subunit beta,<br>mitochondrial                  | GFQQILAGEYDHLPEQAFYMVGPIEEAVAK       |
| 169 | P06576 | ATP synthase subunit beta,<br>mitochondrial                  | IPSAVGYQPTLATDMGTMQER                |
| 170 | P06576 | ATP synthase subunit beta,<br>mitochondrial                  | EGNDLYHEMIESGVINLK                   |
| 171 | P06576 | ATP synthase subunit beta,<br>mitochondrial                  | DQEGQDVLLFIDNIFR                     |
| 172 | P06576 | ATP synthase subunit beta,<br>mitochondrial                  | IMDPNIVGSEHYDVAR                     |
| 173 | P06576 | ATP synthase subunit beta,<br>mitochondrial                  | QFAPIHAEAPEFMEMSVEQEILVTGIK          |
| 174 | P06576 | ATP synthase subunit beta,<br>mitochondrial                  | VLDSGAPIKIPVGPETLGR                  |
| 175 | P06576 | ATP synthase subunit beta,<br>mitochondrial                  | LVLEVAQHLGESTVR                      |
| 176 | P06576 | ATP synthase subunit beta,<br>mitochondrial                  | SLQDIAILGMDELSEEDKLTVSR              |
| 177 | P06576 | ATP synthase subunit beta,<br>mitochondrial                  | KGSITSVQAIYVPADDLTDPAATTFAHLDATTVLSR |
| 178 | O15530 | 3-phosphoinositide-dependent<br>protein kinase 1             | VLSPESK                              |
| 179 | O15530 | 3-phosphoinositide-dependent<br>protein kinase 1             | ELATSREYAIK                          |
| 180 | O15530 | 3-phosphoinositide-dependent<br>protein kinase 1             | ENKVPYVTR                            |
| 181 | O15530 | 3-phosphoinositide-dependent<br>protein kinase 1             | LEYDFPEK                             |
| 182 | O15530 | 3-phosphoinositide-dependent<br>protein kinase 1             | TTSQLYDAVPIQSSVVLCSPPSPSMVR          |
| 183 | O15530 | 3-phosphoinositide-dependent<br>protein kinase 1             | LDHPFFVK                             |
| 184 | O15530 | 3-phosphoinositide-dependent<br>protein kinase 1             | VPYVTR                               |
| 185 | O15530 | 3-phosphoinositide-dependent<br>protein kinase 1             | VLKGEIPWSQELRPEAK                    |
| 186 | O15530 | 3-phosphoinositide-dependent<br>protein kinase 1             | VLSPESKQAR                           |
| 187 | O15530 | 3-phosphoinositide-dependent<br>protein kinase 1             | HIKENKVPYVTR                         |
| 188 | O15530 | 3-phosphoinositide-dependent<br>protein kinase 1             | QAGGNPWHQFVENNLILK                   |
| 189 | O15530 | 3-phosphoinositide-dependent                                 | LLVLDATK                             |

|     |        |                                                                      |                               |
|-----|--------|----------------------------------------------------------------------|-------------------------------|
| 190 | O15530 | protein kinase 1<br>3-phosphoinositide-dependent<br>protein kinase 1 | TFFVHTPNR                     |
| 191 | O15530 | 3-phosphoinositide-dependent<br>protein kinase 1                     | IIKLEYDFPEK                   |
| 192 | O15530 | 3-phosphoinositide-dependent<br>protein kinase 1                     | LGCEEMEGYGPLK                 |
| 193 | O15530 | 3-phosphoinositide-dependent<br>protein kinase 1                     | TYYLMDPSGNAHK                 |
| 194 | O15530 | 3-phosphoinositide-dependent<br>protein kinase 1                     | QLLLTEGPHLYYVDPVNK            |
| 195 | O15530 | 3-phosphoinositide-dependent<br>protein kinase 1                     | LYFGLSYAK                     |
| 196 | O15530 | 3-phosphoinositide-dependent<br>protein kinase 1                     | KKRPEDFK                      |
| 197 | O15530 | 3-phosphoinositide-dependent<br>protein kinase 1                     | LLVLDATKR                     |
| 198 | O15530 | 3-phosphoinositide-dependent<br>protein kinase 1                     | IGSFDETCTR                    |
| 199 | O15530 | 3-phosphoinositide-dependent<br>protein kinase 1                     | DVMSRLDHPFFVK                 |
| 200 | O15530 | 3-phosphoinositide-dependent<br>protein kinase 1                     | QGPAMDGTAAEPRPGAGSLQHAQPPPQPR |
| 201 | O15530 | 3-phosphoinositide-dependent<br>protein kinase 1                     | YQSHPDAAVQ                    |
| 202 | O15530 | 3-phosphoinositide-dependent<br>protein kinase 1                     | TQTESSTPPGIPGGSR              |
| 203 | O15530 | 3-phosphoinositide-dependent<br>protein kinase 1                     | RQLLLTEGPHLYYVDPVNK           |
| 204 | O15530 | 3-phosphoinositide-dependent<br>protein kinase 1                     | GEIPWSQELRPEAK                |
| 205 | O15530 | 3-phosphoinositide-dependent<br>protein kinase 1                     | FYTAEIVSALEYLHGK              |
| 206 | O15530 | 3-phosphoinositide-dependent<br>protein kinase 1                     | ILGEGSFSTVVLAR                |
| 207 | O15530 | 3-phosphoinositide-dependent<br>protein kinase 1                     | DLKPENILLNEDMHIQITDFGTAK      |
| 208 | O15530 | 3-phosphoinositide-dependent<br>protein kinase 1                     | AHPFFESVTWENLHQQTTPPK         |
| 209 | O15530 | 3-phosphoinositide-dependent<br>protein kinase 1                     | SGSNIEQYIHDLDNSNFELDLQFSEDEKR |
| 210 | P04083 | Annexin A1                                                           | AAYLQETGKPLDETLK              |
| 211 | P04083 | Annexin A1                                                           | SYPQLR                        |
| 212 | P04083 | Annexin A1                                                           | TPAQFDADELRL                  |
| 213 | P04083 | Annexin A1                                                           | NALLSLAK                      |
| 214 | P04083 | Annexin A1                                                           | ALYEAGER                      |
| 215 | P04083 | Annexin A1                                                           | MYGISLCQAILDETK               |
| 216 | P04083 | Annexin A1                                                           | DITSDTSGDFR                   |
| 217 | P04083 | Annexin A1                                                           | CLTAIVK                       |
| 218 | P04083 | Annexin A1                                                           | SEIDMNDIK                     |
| 219 | P04083 | Annexin A1                                                           | CATSKPAFFAEK                  |
| 220 | P04083 | Annexin A1                                                           | ILVALCGGN                     |
| 221 | P04083 | Annexin A1                                                           | KGTDVNVFNTILTTR               |
| 222 | P04083 | Annexin A1                                                           | GLGTDEDTLIEILASRTNK           |
| 223 | P04083 | Annexin A1                                                           | GTDVNVFNTILTTR                |

|     |        |                                         |                              |
|-----|--------|-----------------------------------------|------------------------------|
| 224 | P04083 | Annexin A1                              | DITSDTSGDFRNALLSLAK          |
| 225 | P04083 | Annexin A1                              | QAWFIENEEQEYVQTVK            |
| 226 | P04083 | Annexin A1                              | GVDEATIIDILTK                |
| 227 | P04083 | Annexin A1                              | GGPGSAVSPYPTFNPSSDVAALHK     |
| 228 | P04083 | Annexin A1                              | GDRSEDFGVNEDLADSDAR          |
| 229 | P04083 | Annexin A1                              | GLGTDEDTLIEILASR             |
| 230 | P04083 | Annexin A1                              | AAYLQETGKPLDETLKK            |
| 231 | P04083 | Annexin A1                              | GVDEATIIDILTKR               |
| 232 | P04083 | Annexin A1                              | SEDFGVNEDLADSDAR             |
| 233 | P04083 | Annexin A1                              | KALTGHLEEVVLLALK             |
| 234 | P04083 | Annexin A1                              | ALTGHLEEVVLLALK              |
| 235 | P48357 | Leptin receptor                         | NLNEDGEIK                    |
| 236 | P48357 | Leptin receptor                         | ISWSSPPLVPFPLQYQVK           |
| 237 | P48357 | Leptin receptor                         | KYYIHDHFIPIEK                |
| 238 | P48357 | Leptin receptor                         | YYIHDHFIPIEK                 |
| 239 | P48357 | Leptin receptor                         | WSTSTIQSLAESTLQLR            |
| 240 | P48357 | Leptin receptor                         | LFICYVESLFLK                 |
| 241 | P48357 | Leptin receptor                         | GPEFWR                       |
| 242 | P48357 | Leptin receptor                         | TTFHCCFR                     |
| 243 | P48357 | Leptin receptor                         | IINSFTQDDIEK                 |
| 244 | P48357 | Leptin receptor                         | EIVWWMNLAEK                  |
| 245 | P48357 | Leptin receptor                         | AEITINIGLLK                  |
| 246 | P48357 | Leptin receptor                         | MYEVYDAK                     |
| 247 | P48357 | Leptin receptor                         | VFTTQDVIYFPPK                |
| 248 | P48357 | Leptin receptor                         | SSLYCSDIPSIHPISEPK           |
| 249 | P48357 | Leptin receptor                         | ISWEKPVFPENNLQFQIR           |
| 250 | P48357 | Leptin receptor                         | YQFSLYPIFMEGVGKPK            |
| 251 | P48357 | Leptin receptor                         | SVSLPVPDLCVAVYAVQVR          |
| 252 | P48357 | Leptin receptor                         | RLDGPGIWSDWSTPR              |
| 253 | P48357 | Leptin receptor                         | EADKIVSATSELLVDSILPGSSYEVQVR |
| 254 | P48357 | Leptin receptor                         | IPQSQYDVVSDHVSK              |
| 255 | P48357 | Leptin receptor                         | FTYDAVYCCNEHECHHR            |
| 256 | P48357 | Leptin receptor                         | VHLLYVLPEVLEDSPLVPQK         |
| 257 | P21860 | Receptor tyrosine-protein kinase erbB-3 | GTQVYDGGK                    |
| 258 | P21860 | Receptor tyrosine-protein kinase erbB-3 | DAEIVVK                      |
| 259 | P21860 | Receptor tyrosine-protein kinase erbB-3 | CPQPLVYNK                    |
| 260 | P21860 | Receptor tyrosine-protein kinase erbB-3 | HFNDSGACVPR                  |
| 261 | P21860 | Receptor tyrosine-protein kinase erbB-3 | IYISANR                      |
| 262 | P21860 | Receptor tyrosine-protein kinase erbB-3 | DRDAEIVVK                    |
| 263 | P21860 | Receptor tyrosine-protein kinase erbB-3 | ACPPDKMEVDK                  |
| 264 | P21860 | Receptor tyrosine-protein kinase erbB-3 | GFSLLIMK                     |
| 265 | P21860 | Receptor tyrosine-protein kinase erbB-3 | IPALDPEK                     |
| 266 | P21860 | Receptor tyrosine-protein kinase erbB-3 | LTFQLEPNPHTK                 |
| 267 | P21860 | Receptor tyrosine-protein kinase        | LTQLTEILSGGVYIEK             |

|     |        |                                                      |                                 |
|-----|--------|------------------------------------------------------|---------------------------------|
| 268 | P21860 | erbB-3<br>Receptor tyrosine-protein kinase<br>erbB-3 | SCPPCHEVCK                      |
| 269 | P21860 | Receptor tyrosine-protein kinase<br>erbB-3           | LCHMDTIDWR                      |
| 270 | P21860 | Receptor tyrosine-protein kinase<br>erbB-3           | NDKLCHMDTIDWR                   |
| 271 | P21860 | Receptor tyrosine-protein kinase<br>erbB-3           | CWGPGEEDCQTLTK                  |
| 272 | P21860 | Receptor tyrosine-protein kinase<br>erbB-3           | DGPHCVSSCPHGVLGAK               |
| 273 | P21860 | Receptor tyrosine-protein kinase<br>erbB-3           | ILGNLDFLITGLNGDPWHK             |
| 274 | P21860 | Receptor tyrosine-protein kinase<br>erbB-3           | GPELQDCLGQTLVLIGK               |
| 275 | P21860 | Receptor tyrosine-protein kinase<br>erbB-3           | YQYGGVCVASCPHNFVVDQTSCVR        |
| 276 | P21860 | Receptor tyrosine-protein kinase<br>erbB-3           | GGVCVTHCNFLNGEPR                |
| 277 | P21860 | Receptor tyrosine-protein kinase<br>erbB-3           | IPALDPEKLNIVFR                  |
| 278 | P04626 | Receptor tyrosine-protein kinase<br>erbB-2           | VLQGLPR                         |
| 279 | P04626 | Receptor tyrosine-protein kinase<br>erbB-2           | GQECVEEER                       |
| 280 | P04626 | Receptor tyrosine-protein kinase<br>erbB-2           | SLTEILK                         |
| 281 | P04626 | Receptor tyrosine-protein kinase<br>erbB-2           | GPLPTDCCHEQCAAGCTGPK            |
| 282 | P04626 | Receptor tyrosine-protein kinase<br>erbB-2           | CWGESSEDCQSLTR                  |
| 283 | P04626 | Receptor tyrosine-protein kinase<br>erbB-2           | GGVLIQR                         |
| 284 | P04626 | Receptor tyrosine-protein kinase<br>erbB-2           | GHCWGPPTQCVNCSQFLR              |
| 285 | P04626 | Receptor tyrosine-protein kinase<br>erbB-2           | VCYGLGMEHLR                     |
| 286 | P04626 | Receptor tyrosine-protein kinase<br>erbB-2           | NNQLALTLIDTNR                   |
| 287 | P04626 | Receptor tyrosine-protein kinase<br>erbB-2           | ACHPCSPMCK                      |
| 288 | P04626 | Receptor tyrosine-protein kinase<br>erbB-2           | AVTSANIQEFAGCKK                 |
| 289 | P04626 | Receptor tyrosine-protein kinase<br>erbB-2           | NPHQALLHTANRPEDECVGEGGLACHQLCAR |
| 290 | P04626 | Receptor tyrosine-protein kinase<br>erbB-2           | AVTSANIQEFAGCK                  |
| 291 | P04626 | Receptor tyrosine-protein kinase<br>erbB-2           | ELGSGLALIIHNTLHLCFVHTVPWDQLFR   |
| 292 | P04626 | Receptor tyrosine-protein kinase<br>erbB-2           | NPQLCYQDTILWK                   |
| 293 | P04626 | Receptor tyrosine-protein kinase<br>erbB-2           | LRLPASPETHLDMLR                 |
| 294 | P04626 | Receptor tyrosine-protein kinase<br>erbB-2           | CPSGVKPDLSYMPIWK                |
| 295 | P04626 | Receptor tyrosine-protein kinase                     | LPASPETHLDMLR                   |

|     |        |                                                      |                                              |
|-----|--------|------------------------------------------------------|----------------------------------------------|
| 296 | P04626 | erbB-2<br>Receptor tyrosine-protein kinase<br>erbB-2 | YTFGASCVTACPYNLSTDVGSCTLCPLHN<br>QEVTAEDGTQR |
| 297 | P04626 | Receptor tyrosine-protein kinase<br>erbB-2           | CKGPLPTDCCHEQCAAGCTGPK                       |
| 298 | Q05513 | Protein kinase C zeta type                           | GFLNKDPK                                     |
| 299 | Q05513 | Protein kinase C zeta type                           | HDSIKDDSEDLKPVIDGMDGIK                       |
| 300 | Q05513 | Protein kinase C zeta type                           | DEGLIHFVFPSTPEQPGLPCPGEDK                    |
| 301 | Q05513 | Protein kinase C zeta type                           | SIDWDLLEKK                                   |
| 302 | Q05513 | Protein kinase C zeta type                           | SHAFFR                                       |
| 303 | Q05513 | Protein kinase C zeta type                           | LTDYGMCK                                     |
| 304 | Q05513 | Protein kinase C zeta type                           | ANGHLFQAK                                    |
| 305 | Q05513 | Protein kinase C zeta type                           | LHQQHPLTLK                                   |
| 306 | Q05513 | Protein kinase C zeta type                           | CHGLVPLTCR                                   |
| 307 | Q05513 | Protein kinase C zeta type                           | WVDSEGDPTVSSQMELEEAFR                        |
| 308 | Q05513 | Protein kinase C zeta type                           | DLKLDNVLLDADGHIK                             |
| 309 | Q05513 | Protein kinase C zeta type                           | LDNVLLDADGHIK                                |
| 310 | Q05513 | Protein kinase C zeta type                           | LGCRPQTGFSDIK                                |
| 311 | Q05513 | Protein kinase C zeta type                           | ISQGLGLQDFDLIR                               |
| 312 | Q05513 | Protein kinase C zeta type                           | SIDWDLLEK                                    |
| 313 | Q05513 | Protein kinase C zeta type                           | ELVHDEDEDIDWVQTEK                            |
| 314 | Q05513 | Protein kinase C zeta type                           | KHDSIKDDSEDLKPVIDGMDGIK                      |
| 315 | Q05513 | Protein kinase C zeta type                           | HVFEQASSNPFLVGLHSCFQTTSR                     |
| 316 | Q05513 | Protein kinase C zeta type                           | AHYGGDIFITSVDAATTFEELCEEVR                   |
| 317 | Q05513 | Protein kinase C zeta type                           | SPFDIITDNPDMNTEDYLFQVILEKPIR                 |
| 318 | P38919 | Eukaryotic initiation factor 4A-III                  | ELAVQIQK                                     |
| 319 | P38919 | Eukaryotic initiation factor 4A-III                  | DELTLEGIK                                    |
| 320 | P38919 | Eukaryotic initiation factor 4A-III                  | FMTDPIR                                      |
| 321 | P38919 | Eukaryotic initiation factor 4A-III                  | QFFVAVER                                     |
| 322 | P38919 | Eukaryotic initiation factor 4A-III                  | RKVDWLTEK                                    |
| 323 | P38919 | Eukaryotic initiation factor 4A-III                  | KVDWLTEK                                     |
| 324 | P38919 | Eukaryotic initiation factor 4A-III                  | ELYIHR                                       |
| 325 | P38919 | Eukaryotic initiation factor 4A-III                  | KGVAINFVKNDDIR                               |
| 326 | P38919 | Eukaryotic initiation factor 4A-III                  | ETQALILAPTR                                  |
| 327 | P38919 | Eukaryotic initiation factor 4A-III                  | VDWLTEK                                      |
| 328 | P38919 | Eukaryotic initiation factor 4A-III                  | VLISTDVWAR                                   |
| 329 | P38919 | Eukaryotic initiation factor 4A-III                  | YLPPATQVVLLISATLPHEILEMTNK                   |
| 330 | P38919 | Eukaryotic initiation factor 4A-III                  | KGVAINFVK                                    |
| 331 | P38919 | Eukaryotic initiation factor 4A-III                  | LDYGQHVVAGTPGR                               |
| 332 | P38919 | Eukaryotic initiation factor 4A-III                  | LLKEEDMTK                                    |
| 333 | P38919 | Eukaryotic initiation factor 4A-III                  | GLDVPQVSLIINYDLPNNR                          |
| 334 | P38919 | Eukaryotic initiation factor 4A-III                  | MLVLDEADEMLNK                                |
| 335 | P38919 | Eukaryotic initiation factor 4A-III                  | EANFTVSSMHGDMPQK                             |
| 336 | P38919 | Eukaryotic initiation factor 4A-III                  | GIYAYGFEKPSAIQQR                             |
| 337 | P38919 | Eukaryotic initiation factor 4A-III                  | GRDVIAQSQSGTGK                               |
| 338 | P38919 | Eukaryotic initiation factor 4A-III                  | KLDYGQHVVAGTPGR                              |
| 339 | P27361 | Mitogen-activated protein kinase 3                   | EIQILLR                                      |
| 340 | P27361 | Mitogen-activated protein kinase 3                   | YIHSANVLHR                                   |
| 341 | P27361 | Mitogen-activated protein kinase 3                   | ALDLLDR                                      |
| 342 | P27361 | Mitogen-activated protein kinase 3                   | ICDFGLAR                                     |
| 343 | P27361 | Mitogen-activated protein kinase 3                   | NYLQSLPSK                                    |
| 344 | P27361 | Mitogen-activated protein kinase 3                   | MLTFNPNKR                                    |
| 345 | P27361 | Mitogen-activated protein kinase 3                   | GQPFVDGPR                                    |
| 346 | P27361 | Mitogen-activated protein kinase 3                   | FQPGVLEAP                                    |



|     |        |                                       |                             |
|-----|--------|---------------------------------------|-----------------------------|
| 347 | P27361 | Mitogen-activated protein kinase 3    | RTEGVGPGVPGEVEMVK           |
| 348 | P27361 | Mitogen-activated protein kinase 3    | APEIMLNSK                   |
| 349 | P27361 | Mitogen-activated protein kinase 3    | ELIFQETAR                   |
| 350 | P27361 | Mitogen-activated protein kinase 3    | LKELIFQETAR                 |
| 351 | P27361 | Mitogen-activated protein kinase 3    | DLKPSNLLINTTCDLK            |
| 352 | P27361 | Mitogen-activated protein kinase 3    | TEGVGPGVPGEVEMVK            |
| 353 | P27361 | Mitogen-activated protein kinase 3    | SQQLSNDHICYFLYQILR          |
| 354 | P27361 | Mitogen-activated protein kinase 3    | ISPFHQTYCQR                 |
| 355 | P27361 | Mitogen-activated protein kinase 3    | FRHENVIGIR                  |
| 356 | P27361 | Mitogen-activated protein kinase 3    | YTQLQYIGEGAYGMVSSAYDHVR     |
| 357 | P27361 | Mitogen-activated protein kinase 3    | IADPEHDHTGFLTEYVATR         |
| 358 | P28482 | Mitogen-activated protein kinase 1    | LKELIFEETAR                 |
| 359 | P28482 | Mitogen-activated protein kinase 1    | DLKPSNLLLNTTCDLK            |
| 360 | P08069 | Insulin-like growth factor 1 receptor | DKIPIR                      |
| 361 | P08069 | Insulin-like growth factor 1 receptor | GAKSEILYIR                  |
| 362 | P08069 | Insulin-like growth factor 1 receptor | VAGLESLGDLFPNLTVIR          |
| 363 | P08069 | Insulin-like growth factor 1 receptor | NDYQQLK                     |
| 364 | P08069 | Insulin-like growth factor 1 receptor | YRPPDYR                     |
| 365 | P08069 | Insulin-like growth factor 1 receptor | QPQDGYLYR                   |
| 366 | P08069 | Insulin-like growth factor 1 receptor | LCVSEIYR                    |
| 367 | P08069 | Insulin-like growth factor 1 receptor | TIDSVTSAQMLQGCTIFK          |
| 368 | P08069 | Insulin-like growth factor 1 receptor | DLISFTVYYK                  |
| 369 | P08069 | Insulin-like growth factor 1 receptor | MYFAFNPK                    |
| 370 | P08069 | Insulin-like growth factor 1 receptor | IIITWHR                     |
| 371 | P08069 | Insulin-like growth factor 1 receptor | ECGDLCPGTMEEKPMCEK          |
| 372 | P08069 | Insulin-like growth factor 1 receptor | TVISNLRPFTLYR               |
| 373 | P08069 | Insulin-like growth factor 1 receptor | HSHALVSLSFLK                |
| 374 | P08069 | Insulin-like growth factor 1 receptor | LGCSASNFVAFAR               |
| 375 | P08069 | Insulin-like growth factor 1 receptor | VFENFLHNSIFVPRPER           |
| 376 | P08069 | Insulin-like growth factor 1 receptor | AVTLTMVENDHIR               |
| 377 | P08069 | Insulin-like growth factor 1 receptor | TMPAEGADDIPGPVTWEPRPENSIFLK |
| 378 | P08069 | Insulin-like growth factor 1 receptor | KVFENFLHNSIFVPRPER          |
| 379 | P08069 | Insulin-like growth factor 1 receptor | HYYYAGVCVPACPPNTYR          |
| 380 | P08069 | Insulin-like growth factor 1 receptor | IDIHSCNHEAEK                |
| 381 | P61981 | 14-3-3 protein gamma                  | YLAEVATGEKR                 |
| 382 | Q04917 | 14-3-3 protein eta                    | EAFEISK                     |
| 383 | P61981 | 14-3-3 protein gamma                  | MVDREQLVQK                  |
| 384 | P61981 | 14-3-3 protein gamma                  | KIEMVR                      |
| 385 | P61981 | 14-3-3 protein gamma                  | MKGDYYR                     |
| 386 | P61981 | 14-3-3 protein gamma                  | NLLSVAYK                    |
| 387 | P61981 | 14-3-3 protein gamma                  | ATVVESSEK                   |
| 388 | P61981 | 14-3-3 protein gamma                  | DSTLIMQLLR                  |
| 389 | P61981 | 14-3-3 protein gamma                  | RATVVESSEK                  |
| 390 | P61981 | 14-3-3 protein gamma                  | VISSIEQK                    |
| 391 | P61981 | 14-3-3 protein gamma                  | EHMQPThPIR                  |
| 392 | P61981 | 14-3-3 protein gamma                  | YDDMAAAMK                   |
| 393 | P61981 | 14-3-3 protein gamma                  | YLAEVATGEK                  |
| 394 | P61981 | 14-3-3 protein gamma                  | NCSETQYESK                  |
| 395 | P61981 | 14-3-3 protein gamma                  | AYSEAHEISK                  |
| 396 | P61981 | 14-3-3 protein gamma                  | LGLALNYSVFYYEIQNAPEQACHLAK  |
| 397 | P61981 | 14-3-3 protein gamma                  | NVTELNEPLSNEER              |
| 398 | P61981 | 14-3-3 protein gamma                  | TAFDDAIAELDTLNEDSYK         |
| 399 | P61981 | 14-3-3 protein gamma                  | ELEAVCQDVLSLLDNYLIK         |
| 400 | P31947 | 14-3-3 protein sigma                  | GEELSCEER                   |

|     |        |                                     |                                  |
|-----|--------|-------------------------------------|----------------------------------|
| 401 | P31947 | 14-3-3 protein sigma                | ASLIQK                           |
| 402 | P31947 | 14-3-3 protein sigma                | SAYQEAMDISKK                     |
| 403 | P31947 | 14-3-3 protein sigma                | VLSSIEQK                         |
| 404 | P31947 | 14-3-3 protein sigma                | YLAEVATGDDK                      |
| 405 | P31947 | 14-3-3 protein sigma                | YEDMAAFMK                        |
| 406 | P31947 | 14-3-3 protein sigma                | NLLSVAYKNVVGQR                   |
| 407 | P31947 | 14-3-3 protein sigma                | SNEEGSEEKGPEVR                   |
| 408 | P31947 | 14-3-3 protein sigma                | GAVEKGEELSCEER                   |
| 409 | P31947 | 14-3-3 protein sigma                | YLAEVATGDDKKR                    |
| 410 | P31947 | 14-3-3 protein sigma                | VETELQGVCDTVLGLLDSHLIK           |
| 411 | P63104 | 14-3-3 protein zeta/delta           | YLAEVAAGDDKK                     |
| 412 | P62258 | 14-3-3 protein epsilon              | AAFDDAIAELDTLSEESYKDSTLIMQLLR    |
| 413 | Q16539 | Mitogen-activated protein kinase 14 | NYIQSLTQMPK                      |
| 414 | Q16539 | Mitogen-activated protein kinase 14 | ILDFGLAR                         |
| 415 | Q16539 | Mitogen-activated protein kinase 14 | TIWEVPER                         |
| 416 | Q16539 | Mitogen-activated protein kinase 14 | LSRPFQSIHAK                      |
| 417 | Q16539 | Mitogen-activated protein kinase 14 | MLVLDSDKR                        |
| 418 | Q16539 | Mitogen-activated protein kinase 14 | LVGTPGAELLK                      |
| 419 | Q16539 | Mitogen-activated protein kinase 14 | KLSRPFQSIHAK                     |
| 420 | Q16539 | Mitogen-activated protein kinase 14 | LVGTPGAELLKK                     |
| 421 | Q16539 | Mitogen-activated protein kinase 14 | SLTYDEVISFVPPPLDQEEMES           |
| 422 | Q16539 | Mitogen-activated protein kinase 14 | DLLIDEWK                         |
| 423 | Q16539 | Mitogen-activated protein kinase 14 | YIHSADIIHR                       |
| 424 | Q16539 | Mitogen-activated protein kinase 14 | DLKPSNLAVNEDCELK                 |
| 425 | Q16539 | Mitogen-activated protein kinase 14 | TLFPGTDHIDQLK                    |
| 426 | Q16539 | Mitogen-activated protein kinase 14 | HENVIGLLDVFTPAR                  |
| 427 | Q16539 | Mitogen-activated protein kinase 14 | LTDDHVQFLIYQILR                  |
| 428 | Q16539 | Mitogen-activated protein kinase 14 | YQNLSPVGSGAYGSVCAAFDTK           |
| 429 | P07288 | Prostate-specific antigen           | SVILLGR                          |
| 430 | P07288 | Prostate-specific antigen           | IVGGWECEK                        |
| 431 | P07288 | Prostate-specific antigen           | LQCVDLHVISNDVCAQVHPQK            |
| 432 | P07288 | Prostate-specific antigen           | LSEPAELTDAVK                     |
| 433 | P07288 | Prostate-specific antigen           | HSLFHPEDTGQVFQVSHSFPHPPLYDMSLLK  |
| 434 | P07288 | Prostate-specific antigen           | STCSGDSGGPLVCNGVLQGITSWGSEPCAL   |
|     |        |                                     | PERPSLYTK                        |
| 435 | P07288 | Prostate-specific antigen           | FLRPGDDSSHDLMLLR                 |
| 436 | P07288 | Prostate-specific antigen           | HSQPWQVLVASR                     |
| 437 | P07288 | Prostate-specific antigen           | KLQCVDLHVISNDVCAQVHPQK           |
| 438 | P07288 | Prostate-specific antigen           | VMDLPTQEPALGTTCYASGWGSIEPEEFLTPK |
| 439 | P07288 | Prostate-specific antigen           | AVCGGVLVHPQWVLTAAHCIR            |
| 440 | Q99497 | Protein DJ-1 (PARK7)                | RALVILAK                         |
| 441 | Q99497 | Protein DJ-1 (PARK7)                | APLVLK                           |
| 442 | Q99497 | Protein DJ-1 (PARK7)                | EILKEQENR                        |
| 443 | Q99497 | Protein DJ-1 (PARK7)                | ALVILAK                          |
| 444 | Q99497 | Protein DJ-1 (PARK7)                | DGLILTSR                         |
| 445 | Q99497 | Protein DJ-1 (PARK7)                | KGLIAAICAGPTALLAHEIGFGSK         |
| 446 | Q99497 | Protein DJ-1 (PARK7)                | VTVAGLAGKDPVQCSR                 |
| 447 | Q99497 | Protein DJ-1 (PARK7)                | GAEEMETVIPVDVMR                  |
| 448 | Q99497 | Protein DJ-1 (PARK7)                | DVVICPDASLEDAK                   |
| 449 | Q99497 | Protein DJ-1 (PARK7)                | DVVICPDASLEDAKK                  |
| 450 | Q99497 | Protein DJ-1 (PARK7)                | EGPYDVVVLPGGNLGAQNLSESAVK        |
| 451 | Q99497 | Protein DJ-1 (PARK7)                | GPGTSFEFALAIVEALNGK              |
| 452 | Q99497 | Protein DJ-1 (PARK7)                | GLIAAICAGPTALLAHEIGFGSK          |
| 453 | P04179 | Superoxide dismutase [Mn],          | DFGSFDKFK                        |

|     |           |                                                              |                                        |
|-----|-----------|--------------------------------------------------------------|----------------------------------------|
| 454 | P04179    | mitochondrial<br>Superoxide dismutase [Mn],<br>mitochondrial | DFGSFDK                                |
| 455 | P04179    | Superoxide dismutase [Mn],<br>mitochondrial                  | YQEALAK                                |
| 456 | P04179    | Superoxide dismutase [Mn],<br>mitochondrial                  | FNGGGHINHSIFWTNLSPNGGGEPK              |
| 457 | P04179    | Superoxide dismutase [Mn],<br>mitochondrial                  | GELLEAIK                               |
| 458 | P04179    | Superoxide dismutase [Mn],<br>mitochondrial                  | NVRPDYLK                               |
| 459 | P04179    | Superoxide dismutase [Mn],<br>mitochondrial                  | GELLEAIKR                              |
| 460 | P04179    | Superoxide dismutase [Mn],<br>mitochondrial                  | LTAASVGVQGSWGWLGFNK                    |
| 461 | P04179    | Superoxide dismutase [Mn],<br>mitochondrial                  | GDVTAQIALQPALK                         |
| 462 | P04179    | Superoxide dismutase [Mn],<br>mitochondrial                  | AIWNVINWENVTER                         |
| 463 | P04179    | Superoxide dismutase [Mn],<br>mitochondrial                  | HHAAYVNNLNVTEEK                        |
| 464 | P04179    | Superoxide dismutase [Mn],<br>mitochondrial                  | GHLQIAACPNDPLQGTTGLIPLLIGIDVWEHAYYLQYK |
| 465 | D6RFX5    | Amphiregulin                                                 | THSMIDSSLSK                            |
| 466 | D6RFX5    | Amphiregulin                                                 | TESENTSDKPK                            |
| 467 | D6RFX5    | Amphiregulin                                                 | CQQEYFGER                              |
| 468 | D6RFX5    | Amphiregulin                                                 | VEQVVKPPQNKTESENTSDKPK                 |
| 469 | D6RFX5    | Amphiregulin                                                 | VEQVVKPPQNK                            |
| 470 | D6RFX5    | Amphiregulin                                                 | KNPCNAEFQNFCEIHEGCK                    |
| 471 | D6RFX5    | Amphiregulin                                                 | NPCNAEFQNFCEIHEGCK                     |
| 472 | D6RFX5    | Amphiregulin                                                 | YIEHLEAVTCK                            |
| 473 | D6RFX5    | Amphiregulin                                                 | KKNPCNAEFQNFCEIHEGCK                   |
| 474 | P29353-6  | Isoform 6 of SHC-transforming<br>protein 1                   | GEPWFHGK                               |
| 475 | P29353-6  | Isoform 6 of SHC-transforming<br>protein 1                   | HLLLVDPEGVVRTKDHR                      |
| 476 | P29353-6  | Isoform 6 of SHC-transforming<br>protein 1                   | HLLLVDPEGVVRTK                         |
| 477 | P29353-6  | Isoform 6 of SHC-transforming<br>protein 1                   | ESTTTPGQYVLTGLQSGQPK                   |
| 478 | P29353-6  | Isoform 6 of SHC-transforming<br>protein 1                   | HLLLVDPEGVVR                           |
| 479 | P29353-6  | Isoform 6 of SHC-transforming<br>protein 1                   | EAEALLQLNGDFLVR                        |
| 480 | P29353-6  | Isoform 6 of SHC-transforming<br>protein 1                   | REAEALLQLNGDFLVR                       |
| 481 | P29353-6  | Isoform 6 of SHC-transforming<br>protein 1                   | FESVSHLISYHMDNHLPIISAGSELCLQQPVER      |
| 482 | P15692-11 | Isoform L-VEGF165 of Vascular<br>endothelial growth factor A | QLELNER                                |
| 483 | P15692-11 | Isoform L-VEGF165 of Vascular<br>endothelial growth factor A | QENPCGPCSER                            |
| 484 | P15692-11 | Isoform L-VEGF165 of Vascular<br>endothelial growth factor A | FMDVYQR                                |
| 485 | P15692-11 | Isoform L-VEGF165 of Vascular                                | IKPHQGQHIGEMSFLQHNK                    |

|     |           |                                                                                          |                                   |
|-----|-----------|------------------------------------------------------------------------------------------|-----------------------------------|
| 486 | P15692-11 | endothelial growth factor A<br>Isoform L-VEGF165 of Vascular endothelial growth factor A | ARQENPCGPCSER                     |
| 487 | P15692-11 | endothelial growth factor A<br>Isoform L-VEGF165 of Vascular endothelial growth factor A | HLFVQDPQTCK                       |
| 488 | P15692-11 | endothelial growth factor A<br>Isoform L-VEGF165 of Vascular endothelial growth factor A | KHLFVQDPQTCK                      |
| 489 | P15692-11 | endothelial growth factor A<br>Isoform L-VEGF165 of Vascular endothelial growth factor A | CGGCCNDEGLECVPTEESNITMQIMR        |
| 490 | P15692-11 | endothelial growth factor A<br>Isoform L-VEGF165 of Vascular endothelial growth factor A | SYCHPIETLVDIFQEYPDEIEYIFKPSCVPLMR |
| 491 | P52823    | Stanniocalcin-1                                                                          | VFLAIR                            |
| 492 | P52823    | Stanniocalcin-1                                                                          | SFLYSAAK                          |
| 493 | P52823    | Stanniocalcin-1                                                                          | NPEAITEVVQLPNHFSNR                |
| 494 | P52823    | Stanniocalcin-1                                                                          | CIANGVTSK                         |
| 495 | P52823    | Stanniocalcin-1                                                                          | MIAEVQEECYSK                      |
| 496 | P52823    | Stanniocalcin-1                                                                          | VAAQNSAEVVVR                      |
| 497 | P52823    | Stanniocalcin-1                                                                          | SLLECEDTVSTIR                     |
| 498 | P52823    | Stanniocalcin-1                                                                          | RNPEAITEVVQLPNHFSNR               |
| 499 | P52823    | Stanniocalcin-1                                                                          | IGPNMASLFHILQTDHCAQTHPR           |
| 500 | Q9NX40    | OCIA domain-containing protein 1                                                         | VNKYGDTWDE                        |
| 501 | Q9NX40    | OCIA domain-containing protein 1                                                         | KLENSPLGEALR                      |
| 502 | Q9NX40    | OCIA domain-containing protein 1                                                         | TDPSVRPMHER                       |
| 503 | Q9NX40    | OCIA domain-containing protein 1                                                         | ESYEVSLTQK                        |
| 504 | Q9NX40    | OCIA domain-containing protein 1                                                         | SVPLAATSMLITQGLISK                |
| 505 | Q9NX40    | OCIA domain-containing protein 1                                                         | GILSSHPK                          |
| 506 | Q9NX40    | OCIA domain-containing protein 1                                                         | LENSPLGEALR                       |
| 507 | Q9NX40    | OCIA domain-containing protein 1                                                         | VFAECNDESEFWFR                    |
| 508 | Q9NX40    | OCIA domain-containing protein 1                                                         | SSPPGHYYQK                        |
| 509 | Q9NX40    | OCIA domain-containing protein 1                                                         | ADFREPNAEVPRPIPHIGPDYIPTEEER      |
| 510 | O15392    | Baculoviral IAP repeat-containing protein 5                                              | QFEELTLGEFLK                      |
| 511 | O15392    | Baculoviral IAP repeat-containing protein 5                                              | KQFEELTLGEFLK                     |
| 512 | O15392    | Baculoviral IAP repeat-containing protein 5                                              | NWPFLEGCACTER                     |
| 513 | O15392    | Baculoviral IAP repeat-containing protein 5                                              | MAEAGFIHCPTENEPDLAQCFCK           |
| 514 | O15392    | Baculoviral IAP repeat-containing protein 5                                              | ELEGWEPDDDPPIEEHKK                |
| 515 | P51671    | Eotaxin                                                                                  | AVIFKTKLAK                        |
| 516 | P51671    | Eotaxin                                                                                  | WVQDSMK                           |
| 517 | P51671    | Eotaxin                                                                                  | KIPLQRLESYR                       |
| 518 | P51671    | Eotaxin                                                                                  | DICADPKK                          |
| 519 | P51671    | Eotaxin                                                                                  | SPTPKP                            |
| 520 | P51671    | Eotaxin                                                                                  | DICADPK                           |
| 521 | P51671    | Eotaxin                                                                                  | TKLAKDICADPK                      |
| 522 | P51671    | Eotaxin                                                                                  | KWVQDSMK                          |
| 523 | P21802-11 | Isoform 11 of Fibroblast growth factor receptor 2                                        | MLKDDATEK                         |
| 524 | P21802-11 | Isoform 11 of Fibroblast growth factor receptor 2                                        | QLVEDLDR                          |
| 525 | P21802-11 | Isoform 11 of Fibroblast growth factor receptor 2                                        | LTLGKPLGEGCFGQVMAEAVGIDKDKPK      |
| 526 | P21802-11 | Isoform 11 of Fibroblast growth factor receptor 2                                        | GMEYLASQK                         |

|     |           |                                                                 |                              |
|-----|-----------|-----------------------------------------------------------------|------------------------------|
| 527 | P21802-11 | receptor 2<br>Isoform 11 of Fibroblast growth factor receptor 2 | EAVTVAVK                     |
| 528 | P21802-11 | Isoform 11 of Fibroblast growth factor receptor 2               | LSSTADTPMLAGVSEYELPEDPKWEFPR |
| 529 | P10145-2  | Isoform 2 of Interleukin-8                                      | ENWVQR                       |
| 530 | P10145-2  | Isoform 2 of Interleukin-8                                      | ELCLDPK                      |
| 531 | P10145-2  | Isoform 2 of Interleukin-8                                      | TYSKPFHPK                    |
| 532 | P10145-2  | Isoform 2 of Interleukin-8                                      | VIESGPHCANTEIIVK             |

**Supplemental Table 17. Peptides, masses and transition ions selected for aptamer-MRM-MS analyses in representative eight proteins in Figure 6a**

| Protein           | Peptide Sequence | Precursor (z) | Precursor (m/z) | Product (m/z) | Ion type | Collision Energy (V) | Transition color in figures |
|-------------------|------------------|---------------|-----------------|---------------|----------|----------------------|-----------------------------|
| Annexin A1        | GTDVNVFNTILTTR   | (+2)          | 775.912287      | 1064.6099     | [y9]     | 26.2                 | blue                        |
| Annexin A1        | GTDVNVFNTILTTR   | (+2)          | 775.912287      | 965.54146     | [y8]     | 26.2                 | purple                      |
| Annexin A1        | GTDVNVFNTILTTR   | (+2)          | 775.912287      | 818.47304     | [y7]     | 26.2                 | red                         |
| ERBB1 - peptide 1 | NLQEILHGAVR      | (+2)          | 625.354211      | 894.51558     | [y8]     | 21.7                 | blue                        |
| ERBB1 - peptide 1 | NLQEILHGAVR      | (+2)          | 625.354211      | 765.47298     | [y7]     | 21.7                 | purple                      |
| ERBB1 - peptide 1 | NLQEILHGAVR      | (+2)          | 625.354211      | 652.38892     | [y6]     | 21.7                 | red                         |
| ERBB1 - peptide 2 | IPLLENLQIIR      | (+2)          | 604.871705      | 1095.6521     | [y9]     | 21.1                 | blue                        |
| ERBB1 - peptide 2 | IPLLENLQIIR      | (+2)          | 604.871705      | 885.51524     | [y7]     | 21.1                 | purple                      |
| ERBB1 - peptide 2 | IPLLENLQIIR      | (+2)          | 604.871705      | 756.47265     | [y6]     | 21.1                 | red                         |
| ERBB1 - peptide 2 | IPLLENLQIIR      | (+2)          | 604.871705      | 642.42972     | [y5]     | 21.1                 | orange                      |
| ERBB1 - peptide 3 | TDLHAFENLEIIR    | (+3)          | 524.278978      | 757.45666     | [y6]     | 22.2                 | blue                        |
| ERBB1 - peptide 3 | TDLHAFENLEIIR    | (+3)          | 524.278978      | 643.41374     | [y5]     | 22.2                 | purple                      |

peptide 3

ERBB1 -

peptide 3

|               |                |            |            |           |      |      |        |
|---------------|----------------|------------|------------|-----------|------|------|--------|
| TDLHAFENLEIIR | (+3)           | 524.278978 | 530.32967  | [y4]      | 22.2 | red  |        |
| ERBB3         | LTFQLEPNPHTK   | (+3)       | 475.589264 | 693.36785 | [y6] | 20.4 | blue   |
| ERBB3         | LTFQLEPNPHTK   | (+3)       | 475.589264 | 596.31509 | [y5] | 20.4 | purple |
| ERBB3         | LTFQLEPNPHTK   | (+3)       | 475.589264 | 482.27216 | [y4] | 20.4 | red    |
| IL8           | TYSKPFHPK      | (+2)       | 552.795466 | 840.47265 | [y7] | 19.5 | blue   |
| IL8           | TYSKPFHPK      | (+2)       | 552.795466 | 753.44062 | [y6] | 19.5 | purple |
| IL8           | TYSKPFHPK      | (+2)       | 552.795466 | 625.34566 | [y5] | 19.5 | red    |
| PSA           | LSEPAELTDAVK   | (+2)       | 636.837725 | 943.50949 | [y9] | 22   | blue   |
| PSA           | LSEPAELTDAVK   | (+2)       | 636.837725 | 846.45672 | [y8] | 22   | purple |
| PSA           | LSEPAELTDAVK   | (+2)       | 636.837725 | 775.41961 | [y7] | 22   | red    |
| PSA           | LSEPAELTDAVK   | (+2)       | 636.837725 | 646.37702 | [y6] | 22   | orange |
| MnSOD         | GDVTAQIALQPALK | (+2)       | 712.909016 | 981.60914 | [y9] | 24.3 | blue   |
| MnSOD         | GDVTAQIALQPALK | (+2)       | 712.909016 | 853.55057 | [y8] | 24.3 | purple |
| MnSOD         | GDVTAQIALQPALK | (+2)       | 712.909016 | 740.4665  | [y7] | 24.3 | red    |
| MnSOD         | GDVTAQIALQPALK | (+2)       | 712.909016 | 428.28675 | [y4] | 24.3 | orange |
| STC1          | SFLYSAAK       | (+2)       | 443.737085 | 799.43487 | [y7] | 16.2 | blue   |
| STC1          | SFLYSAAK       | (+2)       | 443.737085 | 652.36645 | [y6] | 16.2 | purple |
| STC1          | SFLYSAAK       | (+2)       | 443.737085 | 539.28239 | [y5] | 16.2 | red    |
| VEGF          | HLFVQDPQTCK    | (+2)       | 686.837536 | 975.45641 | [y8] | 23.5 | blue   |
| VEGF          | HLFVQDPQTCK    | (+2)       | 686.837536 | 876.38799 | [y7] | 23.5 | purple |
| VEGF          | HLFVQDPQTCK    | (+2)       | 686.837536 | 748.32942 | [y6] | 23.5 | red    |
| VEGF          | HLFVQDPQTCK    | (+2)       | 686.837536 | 633.30247 | [y5] | 23.5 | orange |

**Supplemental Table 18. Summary of top 40 most abundant proteins identified by LC-MS/MS in plasma after enrichment with streptavidin beads or aptamer-coated streptavidin beads**

| Beads          |                 |                                           | Beads + 29 Aptamers |                 |                                       |
|----------------|-----------------|-------------------------------------------|---------------------|-----------------|---------------------------------------|
| No. of Spectra | Total Intensity | Protein Name                              | No. of Spectra      | Total Intensity | Protein Name                          |
| 222            | 2.81E+11        | Serum albumin                             | 239                 | 2.73E+10        | Apolipoprotein B-100                  |
| 168            | 5.03E+10        | Complement C3                             | 226                 | 1.37E+11        | Complement C3                         |
| 142            | 1.01E+10        | Keratin, type II cytoskeletal 2 epidermal | 220                 | 4.16E+11        | C4b-binding protein alpha chain       |
| 121            | 1.12E+09        | Apolipoprotein B-100                      | 207                 | 3.03E+11        | Serum albumin                         |
| 88             | 8.84E+09        | Serotransferrin                           | 152                 | 4.37E+10        | Coagulation factor V                  |
| 84             | 3.28E+09        | Alpha-2-macroglobulin                     | 139                 | 5.17E+10        | Complement C4-B                       |
| 78             | 6.01E+11        | Streptavidin                              | 133                 | 2.91E+10        | von Willebrand factor                 |
| 74             | 2.17E+10        | Ig gamma-1 chain C region                 | 131                 | 1.81E+10        | Fibronectin                           |
| 72             | 7.66E+09        | Keratin, type I cytoskeletal 10           | 130                 | 3.99E+10        | Complement factor H                   |
| 68             | 3.32E+09        | Complement C4-B                           | 123                 | 7.58E+11        | Streptavidin                          |
| 66             | 5.68E+09        | Alpha-1-antitrypsin                       | 116                 | 3.00E+11        | Ig mu chain C region                  |
| 61             | 5.73E+09        | Apolipoprotein A-I                        | 101                 | 4.91E+11        | Complement C1q subcomponent subunit B |
| 49             | 2.74E+09        | Fibrinogen beta chain                     | 98                  | 7.68E+10        | Ig gamma-1 chain C region             |
| 47             | 5.82E+09        | Haptoglobin                               | 90                  | 1.67E+11        | Complement C1q subcomponent subunit A |
| 47             | 3.87E+09        | Fibrinogen alpha chain                    | 85                  | 2.57E+09        | Filamin-A                             |
| 42             | 5.00E+08        | Complement factor H                       | 84                  | 5.78E+10        | Apolipoprotein A-I                    |
| 41             | 1.82E+09        | Apolipoprotein A-IV                       | 60                  | 9.52E+09        | Serotransferrin                       |
| 39             | 2.55E+08        | Fibronectin                               | 59                  | 1.52E+10        | Fibrinogen alpha chain                |
| 34             | 1.21E+09        | Isoform C of Proteoglycan 4               | 56                  | 3.29E+09        | Alpha-2-macroglobulin                 |
| 32             | 2.06E+09        | Fibrinogen gamma chain                    | 51                  | 2.66E+09        | Complement C5                         |
| 31             | 9.62E+08        | Ceruloplasmin                             | 50                  | 1.01E+10        | Fibrinogen beta chain                 |
| 29             | 1.99E+09        | Hemopexin                                 | 50                  | 2.77E+10        | ITIH4 protein                         |
| 29             | 1.10E+09        | ITIH4 protein                             | 48                  | 1.09E+10        | Isoform C of Proteoglycan 4           |
| 29             | 5.48E+08        | Vitamin D-binding protein                 | 46                  | 3.79E+10        | Protein AMBP                          |
| 28             | 1.65E+08        | Complement C5                             | 44                  | 3.22E+09        | Lactotransferrin                      |
| 27             | 8.05E+09        | Ig kappa chain C region                   | 44                  | 5.74E+09        | Alpha-1-antitrypsin                   |
| 27             | 2.55E+09        | Isoform 2 of Clusterin                    | 43                  | 3.31E+11        | Complement C1q subcomponent subunit C |
| 27             | 7.70E+08        | Kininogen-1                               | 43                  | 6.36E+10        | Ig kappa chain C region               |
| 26             | 8.95E+09        | Apolipoprotein C-III                      | 43                  | 8.19E+08        | Talin-1                               |
| 25             | 1.69E+09        | Ig mu chain C region                      | 42                  | 1.15E+10        | Fibrinogen gamma chain                |
| 23             | 9.50E+09        | Protein APOC4-APOC2                       | 42                  | 1.50E+10        | Coagulation factor XII                |
| 23             | 4.76E+09        | Apolipoprotein A-II                       | 41                  | 4.02E+09        | Apolipoprotein A-IV                   |
| 23             | 2.08E+08        | C4b-binding protein alpha chain           | 41                  | 6.60E+09        | Haptoglobin                           |
| 23             | 1.45E+08        | Coagulation factor XI                     | 39                  | 1.04E+10        | Apolipoprotein E                      |
| 22             | 3.99E+08        | Apolipoprotein E                          | 39                  | 5.98E+08        | Myosin-9                              |
| 22             | 3.23E+08        | Antithrombin-III                          | 37                  | 2.34E+09        | Catalase                              |
| 22             | 2.97E+08        | Uncharacterized protein                   | 36                  | 2.85E+09        | Apolipoprotein(a)                     |
| 21             | 9.13E+10        | Trypsin                                   | 35                  | 1.64E+10        | Kininogen-1                           |
| 21             | 1.36E+09        | Alpha-1-acid glycoprotein 1               | 35                  | 2.52E+09        | Plasma kallikrein                     |
| 20             | 2.90E+09        | Ig lambda-2 chain C regions               | 34                  | 2.87E+10        | Ig lambda-2 chain C regions           |



**Supplemental Table 19. Aptamer-enriched MRM assay performance using heavy isotope labeled peptides**

| Gene  | Uniprot | Species | Peptide             | Transition.ID | slope  | y-intercept | Rsquare | LOD<br>(fmol/uL) | LOQ<br>(fmol/uL) | Comments            |
|-------|---------|---------|---------------------|---------------|--------|-------------|---------|------------------|------------------|---------------------|
| ANXA1 | P04083  | HUMAN   | ALYEAGER            | 2.y6.1.0      | 0.0369 | 0.0167      | 0.9740  | 0.37             | 1.11             |                     |
| ANXA1 | P04083  | HUMAN   | GTDVNVFNTILTTR      | 2.y8.1.0      | 0.0363 | 0.0171      | 0.9688  | 0.22             | 0.65             |                     |
| ANXA1 | P04083  | HUMAN   | GVDEATIIDILTK       | 2.y6.1.0      | 0.0218 | 0.0114      | 0.9762  | 0.65             | 1.96             |                     |
| ANXA1 | P04083  | HUMAN   | TPAQFDADELRL        | 2.y6.1.0      | 0.0383 | 0.0330      | 0.9859  | 0.27             | 0.82             |                     |
| EGFR  | P00533  | HUMAN   | NLQEILHGAVR         | 2.y8.1.0      | 0.3343 | 0.3595      | 0.9144  | 0.70             | 2.10             | endogenous detected |
| EGFR  | P00533  | HUMAN   | NYDLSFLK            | 2.y6.1.0      | 0.0376 | 0.0581      | 0.9403  | 1.50             | 4.51             | endogenous detected |
| ERBB2 | P04626  | HUMAN   | AVTSANIQEFAGCK      | 2.y7.1.0      | 0.0643 | 0.0584      | 0.9368  | 4.64             | 13.92            |                     |
| ERBB2 | P04626  | HUMAN   | NNQLALTLIDTNR       | 2.y9.1.0      | 0.0276 | -0.0008     | 0.9662  | 0.07             | 0.22             |                     |
| KLK3  | P07288  | HUMAN   | HSQPWQVLVASR        | 2.y9.1.0      | 0.1346 | 0.0161      | 0.9869  | 0.16             | 0.49             |                     |
| KLK3  | P07288  | HUMAN   | IVGGWECEK           | 2.y6.1.0      | 0.0605 | -0.0004     | 0.9633  | 0.40             | 1.19             |                     |
| KLK3  | P07288  | HUMAN   | LSEPAELTDAVK        | 2.y9.1.0      | 0.1406 | 0.0003      | 0.9646  | 0.19             | 0.56             |                     |
| MK03  | P27361  | HUMAN   | IADPEHDHTGFLTEYVATR | 3.y7.1.0      | 0.0094 | -0.0012     | 0.9757  | 9.96             | 29.87            |                     |
| MK14  | Q16539  | HUMAN   | HENVIGLLDVFTPAR     | 3.y5.1.0      | 0.0238 | 0.0102      | 0.9629  | 0.42             | 1.25             |                     |
| PARK7 | Q99497  | HUMAN   | VTVAGLAGK           | 2.y7.1.0      | 0.0052 | 0.0039      | 0.9329  | 0.60             | 1.79             |                     |
| TPM1  | P09493  | HUMAN   | LVIIESDLER          | 2.y7.1.0      | 0.0252 | 0.0000      | 0.9954  | 0.07             | 0.21             |                     |
| TPM1  | P09493  | HUMAN   | QLEDELVSLQK         | 2.y6.1.0      | 0.1019 | -0.0117     | 0.9893  | 1.30             | 3.89             |                     |
| TPM1  | P09493  | HUMAN   | SIDDEDELYAQK        | 2.y8.1.0      | 0.1595 | -0.0041     | 0.9782  | 0.40             | 1.21             |                     |
| 1433S | P31947  | HUMAN   | NLLSVAYK            | 2.y6.1.0      | 0.0502 | 0.9418      | 0.9634  | 16.38            | 49.14            | endogenous detected |
| 1433S | P31947  | HUMAN   | VLSSIEQK            | 2.y6.1.0      | 0.0575 | 0.0216      | 0.9635  | 3.27             | 9.80             | endogenous detected |

**Supplemental Table 20. Aptamer-enriched MRM assay performance using light peptide peak areas**

| Gene  | UniProt | Species | Peptide             | TransitionID | slope  | y-intercept | Rsquare | LOD<br>(fmol/uL) | LOQ<br>(fmol/uL) | Comments            |
|-------|---------|---------|---------------------|--------------|--------|-------------|---------|------------------|------------------|---------------------|
| ANXA1 | P04083  | HUMAN   | ALYEAGER            | 2.y6.1.0     | 49596  | 22008       | 0.8981  | 0.21             | 0.63             |                     |
| ANXA1 | P04083  | HUMAN   | GTDVNVFNTILTTR      | 2.y8.1.0     | 7990   | 3308        | 0.9454  | 0.33             | 1.00             |                     |
| ANXA1 | P04083  | HUMAN   | GVDEATIIDILTK       | 2.y6.1.0     | 8509   | 2860        | 0.9596  | 0.26             | 0.79             |                     |
| ANXA1 | P04083  | HUMAN   | TPAQFDADELRL        | 2.y7.1.0     | 19434  | 6070        | 0.9700  | 0.69             | 2.08             |                     |
| AREG  | P15514  | HUMAN   | CQQEYFGER           | 2.y7.1.0     | 57506  | -462        | 0.9752  | 0.05             | 0.16             |                     |
| AREG  | P15514  | HUMAN   | VEQVVKPPQNK         | 3.y5.1.0     | 319364 | 5062        | 0.9435  | 0.06             | 0.19             |                     |
| AREG  | P15514  | HUMAN   | YIEHLEAVTCK         | 2.y6.1.0     | 43358  | -971        | 0.9002  | 0.12             | 0.35             |                     |
| ATPB  | P06576  | HUMAN   | AIAELGIYPAVDPLDSTSR | 2.y12.1.0    | 14398  | 3           | 0.9460  | 0.35             | 1.05             |                     |
| ATPB  | P06576  | HUMAN   | FTQAGSEVSALLGR      | 2.y10.1.0    | 31376  | -287        | 0.9523  | 0.39             | 1.17             |                     |
| ATPB  | P06576  | HUMAN   | LVLEVAQHLGESTVR     | 3.y6.1.0     | 44816  | -396        | 0.9537  | 0.21             | 0.64             |                     |
| ATPB  | P06576  | HUMAN   | VLDSGAPIK           | 2.y6.1.0     | 40579  | 1419        | 0.9492  | 0.03             | 0.10             |                     |
| BIRC5 | O15392  | HUMAN   | HSSGCAFLSVK         | 2.y8.1.0     | 567    | -17         | 0.9340  | 6.90             | 20.69            |                     |
| BIRC5 | O15392  | HUMAN   | QFEELTLGFEFLK       | 2.y7.1.0     | 1826   | -71         | 0.9449  | 0.96             | 2.87             |                     |
| CCL11 | P51671  | HUMAN   | DICADPK             | 2.y5.1.0     | 37669  | 1662        | 0.8131  | 0.16             | 0.48             |                     |
| CCL11 | P51671  | HUMAN   | WVQDSMK             | 2.y5.1.0     | 40583  | 692         | 0.9182  | 0.39             | 1.18             |                     |
| EGFR  | P00533  | HUMAN   | FSNNPALCNVESIQWR    | 2.y9.1.0     | 16593  | 13493       | 0.8398  | 1.11             | 3.33             | endogenous detected |
| EGFR  | P00533  | HUMAN   | IPLLENLQIIR         | 2.y7.1.0     | 59914  | 64945       | 0.8861  | 1.00             | 3.00             | endogenous detected |
| EGFR  | P00533  | HUMAN   | NLQEILHGAVR         | 2.y8.1.0     | 46190  | 50365       | 0.8863  | 0.26             | 0.78             | endogenous detected |
| EGFR  | P00533  | HUMAN   | NYDLSFLK            | 2.y6.1.0     | 47916  | 86708       | 0.8963  | 1.61             | 4.84             | endogenous detected |
| EGFR  | P00533  | HUMAN   | TDLHAFENLEIIR       | 3.y4.1.0     | 43818  | 83158       | 0.9148  | 1.29             | 3.88             | endogenous detected |
| EGFR  | P00533  | HUMAN   | TIQEVAGYVLIALLNTVER | 2.y9.1.0     | 2141   | 2574        | 0.7949  | 0.74             | 2.23             | endogenous detected |
| ERBB2 | P04626  | HUMAN   | AVTSANIQEFAGCK      | 2.y7.1.0     | 5871   | 4134        | 0.9201  | 1.17             | 3.51             |                     |
| ERBB2 | P04626  | HUMAN   | NNQLALTLIDTNR       | 2.y9.1.0     | 5381   | -155        | 0.9148  | 0.07             | 0.21             |                     |
| ERBB2 | P04626  | HUMAN   | VLQGLPR             | 2.y5.1.0     | 152912 | 725         | 0.9240  | 0.03             | 0.08             |                     |
| ERBB3 | P21860  | HUMAN   | CWGPGSEDCQTLTK      | 2.y11.1.0    | 1535   | -183        | 0.9156  | 0.45             | 1.35             |                     |
| ERBB3 | P21860  | HUMAN   | IPALDPEK            | 2.y3.1.0     | 37642  | 4365        | 0.9441  | 1.09             | 3.28             |                     |
| ERBB3 | P21860  | HUMAN   | IYISANR             | 2.y5.1.0     | 158663 | 22521       | 0.9877  | 0.11             | 0.34             |                     |
| ERBB3 | P21860  | HUMAN   | LTFQLEPNPHTK        | 2.y6.1.0     | 15532  | 5651        | 0.9499  | 0.33             | 0.99             |                     |
| FGFR2 | P21802  | HUMAN   | EAVTVAVK            | 2.y5.1.0     | 18789  | 861         | 0.9585  | 0.13             | 0.39             |                     |
| FGFR2 | P21802  | HUMAN   | IADFGLAR            | 2.y6.1.0     | 21518  | 9918        | 0.9256  | 1.81             | 5.43             |                     |
| FGFR2 | P21802  | HUMAN   | QLVEDLDR            | 2.y5.1.0     | 3838   | 1069        | 0.9751  | 0.51             | 1.54             |                     |

|       |        |       |                     |          |        |        |        |       |       |                     |
|-------|--------|-------|---------------------|----------|--------|--------|--------|-------|-------|---------------------|
| IF4A3 | P38919 | HUMAN | ELAVQIQK            | 2.y4.1.0 | 14510  | -1554  | 0.9678 | 0.50  | 1.51  |                     |
| IF4A3 | P38919 | HUMAN | EQIYDVYR            | 2.y5.1.0 | 6434   | 500    | 0.9453 | 1.42  | 4.25  |                     |
| IF4A3 | P38919 | HUMAN | GVAINFVK            | 2.y6.1.0 | 6608   | 1385   | 0.9886 | 0.41  | 1.23  |                     |
| IF4A3 | P38919 | HUMAN | VLISTDVWAR          | 2.y7.1.0 | 6936   | 391    | 0.9655 | 0.66  | 1.98  |                     |
| IGF1R | P08069 | HUMAN | SEILYIR             | 2.y4.1.0 | 24086  | -201   | 0.9631 | 0.20  | 0.61  |                     |
| IGF1R | P08069 | HUMAN | TVISNLRPFTLYR       | 3.y6.1.0 | 1952   | -244   | 0.9220 | 0.16  | 0.49  |                     |
| IGF1R | P08069 | HUMAN | YADGTIDIEEVTENPK    | 2.y8.1.0 | 918    | 118    | 0.9708 | 1.17  | 3.51  |                     |
| IGF1R | P08069 | HUMAN | YGSQVEDQR           | 2.y5.1.0 | 10302  | -4111  | 0.9091 | 0.96  | 2.89  |                     |
| IL8   | P10145 | HUMAN | ELCLDPK             | 2.y4.1.0 | 82976  | -1714  | 0.9589 | 0.17  | 0.50  |                     |
| IL8   | P10145 | HUMAN | ENWVQR              | 2.y3.1.0 | 312937 | 287    | 0.8953 | 0.02  | 0.07  |                     |
| IL8   | P10145 | HUMAN | TYSKPFHPK           | 2.y5.1.0 | 70553  | -6     | 0.8972 | 0.01  | 0.04  |                     |
| IL8   | P10145 | HUMAN | VIESGPHCANTEIIVK    | 3.y7.1.0 | 1814   | -201   | 0.9458 | 0.72  | 2.15  |                     |
| KLK3  | P07288 | HUMAN | HSQPWQVLVASR        | 2.y9.1.0 | 8542   | 1147   | 0.8845 | 0.03  | 0.10  |                     |
| KLK3  | P07288 | HUMAN | IVGGWECEK           | 2.y6.1.0 | 1351   | -10    | 0.9205 | 0.41  | 1.24  |                     |
| KLK3  | P07288 | HUMAN | LSEPAELTDAVK        | 2.y9.1.0 | 45342  | -545   | 0.9564 | 0.17  | 0.50  |                     |
| KLK3  | P07288 | HUMAN | SVILLGR             | 2.y5.1.0 | 117336 | 2799   | 0.9351 | 0.03  | 0.09  |                     |
| KPCZ  | Q05513 | HUMAN | ISQGLGLQDFDLIR      | 2.y9.1.0 | 24357  | -671   | 0.9347 | 0.07  | 0.20  |                     |
| KPCZ  | Q05513 | HUMAN | LDNVLLDADGHIK       | 2.y9.1.0 | 4056   | -121   | 0.9155 | 0.29  | 0.88  |                     |
| KPCZ  | Q05513 | HUMAN | LHQQHPLTLK          | 3.y5.1.0 | 23147  | 416    | 0.9295 | 0.30  | 0.91  |                     |
| KPCZ  | Q05513 | HUMAN | SIDWDLLEK           | 2.y7.1.0 | 13439  | -105   | 0.9555 | 0.01  | 0.03  |                     |
| KPYM  | P14618 | HUMAN | APIIAVTR            | 2.y5.1.0 | 109353 | 345272 | 0.9416 | 1.80  | 5.40  | endogenous detected |
| KPYM  | P14618 | HUMAN | CCSGAIVLTK          | 2.y4.1.0 | 1321   | 5413   | 0.9849 | 6.23  | 18.68 |                     |
| KPYM  | P14618 | HUMAN | GDLGIEIPA EK        | 2.y6.1.0 | 28175  | 47204  | 0.9716 | 2.59  | 7.76  | endogenous detected |
| KPYM  | P14618 | HUMAN | GDYPLEAVR           | 2.y6.1.0 | 29585  | 104351 | 0.9681 | 2.72  | 8.15  | endogenous detected |
| KPYM  | P14618 | HUMAN | GSGTAEVELK          | 2.y6.1.0 | 9422   | 25998  | 0.9322 | 2.65  | 7.94  | endogenous detected |
| KPYM  | P14618 | HUMAN | ITLDNAYMEK          | 2.y7.1.0 | 2602   | 5513   | 0.8601 | 11.35 | 34.06 | endogenous detected |
| KPYM  | P14618 | HUMAN | LDIDSPITAR          | 2.y6.1.0 | 46360  | 143728 | 0.9706 | 2.49  | 7.46  | endogenous detected |
| LEPR  | P48357 | HUMAN | IINSFTQDDIEK        | 2.y7.1.0 | 3804   | 1087   | 0.9625 | 1.16  | 3.48  |                     |
| LEPR  | P48357 | HUMAN | LDGPGIWSDWSTPR      | 2.y8.1.0 | 1320   | -11    | 0.9175 | 1.20  | 3.61  |                     |
| LEPR  | P48357 | HUMAN | SSLYCSDIPSIHPISEPK  | 3.y6.1.0 | 1012   | 1      | 0.9620 | 5.10  | 15.30 |                     |
| LEPR  | P48357 | HUMAN | YYIHDHFIPIEK        | 3.y4.1.0 | 2454   | 395    | 0.9528 | 5.10  | 15.29 |                     |
| MK03  | P27361 | HUMAN | ELIFQETAR           | 2.y6.1.0 | 16298  | 170    | 0.9767 | 0.52  | 1.57  |                     |
| MK03  | P27361 | HUMAN | IADPEHDHTGFLTEYVATR | 3.y7.1.0 | 423    | -55    | 0.9804 | 6.88  | 20.63 |                     |
| MK03  | P27361 | HUMAN | ICDFGLAR            | 2.y6.1.0 | 34408  | 11481  | 0.9188 | 0.44  | 1.33  |                     |

|       |        |       |                   |          |         |       |        |      |       |                     |
|-------|--------|-------|-------------------|----------|---------|-------|--------|------|-------|---------------------|
| MK03  | P27361 | HUMAN | NYLQSLPSK         | 2.y5.1.0 | 5124    | 2537  | 0.9880 | 0.54 | 1.61  |                     |
| MK14  | Q16539 | HUMAN | DLKPSNLAVNEDCELK  | 3.y7.1.0 | 733     | -7    | 0.9870 | 0.18 | 0.53  |                     |
| MK14  | Q16539 | HUMAN | HENVIGLLDVFTPAR   | 3.y5.1.0 | 5042    | 1893  | 0.9652 | 0.35 | 1.05  |                     |
| MK14  | Q16539 | HUMAN | ILDFGLAR          | 2.y6.1.0 | 70912   | 14077 | 0.9382 | 0.74 | 2.21  |                     |
| MK14  | Q16539 | HUMAN | LSRPFQSIIHAK      | 3.y4.1.0 | 1769    | 477   | 0.8434 | 4.37 | 13.11 |                     |
| MK14  | Q16539 | HUMAN | LVGTPGAELLK       | 2.y7.1.0 | 4273    | 2829  | 0.9295 | 1.82 | 5.47  |                     |
| OCAD1 | Q9NX40 | HUMAN | LENSPLGEALR       | 2.y7.1.0 | 5610    | 27    | 0.9721 | 0.98 | 2.94  |                     |
| OCAD1 | Q9NX40 | HUMAN | NITYEELR          | 2.y6.1.0 | 8539    | 437   | 0.9640 | 1.85 | 5.55  |                     |
| PA2G4 | Q9UQ80 | HUMAN | AAHLCAEAALR       | 3.y4.1.0 | 153776  | 13926 | 0.8620 | 0.23 | 0.68  |                     |
| PA2G4 | Q9UQ80 | HUMAN | ITSGPFEPDLYK      | 2.y5.1.0 | 63088   | 13558 | 0.9235 | 1.41 | 4.23  | endogenous detected |
| PA2G4 | Q9UQ80 | HUMAN | LVKPGNQNTQVTEAWNK | 3.y6.1.0 | 23015   | 988   | 0.9399 | 0.23 | 0.70  |                     |
| PA2G4 | Q9UQ80 | HUMAN | SDQDYILK          | 2.y6.1.0 | 45310   | 2938  | 0.9519 | 0.31 | 0.93  |                     |
| PA2G4 | Q9UQ80 | HUMAN | TIIQNPTDQQK       | 2.y6.1.0 | 141126  | 7772  | 0.9288 | 0.22 | 0.66  |                     |
| PARK7 | Q99497 | HUMAN | DGLILTSR          | 2.y4.1.0 | 56823   | 7592  | 0.9254 | 0.77 | 2.30  | endogenous detected |
| PARK7 | Q99497 | HUMAN | VTTHTPLAK         | 2.y7.1.0 | 3975    | 1230  | 0.7596 | 0.48 | 1.43  |                     |
| PARK7 | Q99497 | HUMAN | VTVAGLAGK         | 2.y7.1.0 | 9695    | 6691  | 0.8832 | 0.59 | 1.77  |                     |
| PDPK1 | O15530 | HUMAN | ILGEGSFSTVVLAR    | 2.y7.1.0 | 13552   | -59   | 0.9515 | 0.18 | 0.54  |                     |
| PDPK1 | O15530 | HUMAN | TFFVHTPNR         | 3.y3.1.0 | 26519   | -410  | 0.9016 | 0.19 | 0.57  |                     |
| PDPK1 | O15530 | HUMAN | TQTESSTPPGIPGGSR  | 2.y5.1.0 | 46235   | 872   | 0.9106 | 0.25 | 0.75  |                     |
| PDPK1 | O15530 | HUMAN | VLSPEK            | 2.y5.1.0 | 28775   | 5832  | 0.8073 | 1.26 | 3.77  |                     |
| SHC1  | P29353 | HUMAN | EAEALLQLNGDFLVR   | 2.y8.1.0 | 39351   | 1115  | 0.7030 | 0.08 | 0.25  |                     |
| SHC1  | P29353 | HUMAN | GEPWFHGK          | 2.y6.1.0 | 525143  | -426  | 0.7144 | 0.01 | 0.03  |                     |
| SHC1  | P29353 | HUMAN | HLLLVDPEGVVR      | 2.y6.1.0 | 1040221 | 6046  | 0.7993 | 0.02 | 0.06  |                     |
| SODM  | P04179 | HUMAN | AIWNVINWENVTER    | 2.y9.1.0 | 6310    | -24   | 0.9136 | 0.05 | 0.14  |                     |
| SODM  | P04179 | HUMAN | GDVTAQIALQPALK    | 2.y4.1.0 | 50774   | 2260  | 0.9278 | 0.18 | 0.55  |                     |
| SODM  | P04179 | HUMAN | GELLEAIK          | 2.y5.1.0 | 6775    | -59   | 0.9780 | 0.38 | 1.14  |                     |
| SODM  | P04179 | HUMAN | YQEALAK           | 2.y5.1.0 | 19411   | 2135  | 0.8259 | 0.36 | 1.08  |                     |
| STC1  | P52823 | HUMAN | SFLYSAAK          | 2.y6.1.0 | 20839   | 5009  | 0.9343 | 1.09 | 3.28  |                     |
| STC1  | P52823 | HUMAN | VAAQNSAEVVR       | 2.y6.1.0 | 13658   | 8201  | 0.9668 | 0.59 | 1.77  |                     |
| TPM1  | P09493 | HUMAN | LVIIESDLER        | 2.y7.1.0 | 18379   | 7     | 0.9621 | 0.07 | 0.20  |                     |
| TPM1  | P09493 | HUMAN | QLEDELVSLQK       | 2.y6.1.0 | 9666    | -1135 | 0.9513 | 1.18 | 3.53  |                     |
| TPM1  | P09493 | HUMAN | SIDDLEDELYAQK     | 2.y8.1.0 | 6588    | -177  | 0.9579 | 0.36 | 1.09  |                     |
| VEGFA | P15692 | HUMAN | FMDVYQR           | 2.y5.1.0 | 245496  | 1140  | 0.9211 | 0.07 | 0.20  |                     |
| VEGFA | P15692 | HUMAN | HLFVQDPQTCK       | 2.y5.1.0 | 170003  | 360   | 0.9574 | 0.07 | 0.22  |                     |

|       |        |       |                |          |        |        |        |      |       |                     |
|-------|--------|-------|----------------|----------|--------|--------|--------|------|-------|---------------------|
| VEGFA | P15692 | HUMAN | QLELNER        | 2.y4.1.0 | 200646 | 1728   | 0.9673 | 0.03 | 0.09  |                     |
| 1433G | P61981 | HUMAN | NVTELNEPLSNEER | 2.y7.1.0 | 16279  | 80153  | 0.7411 | 2.80 | 8.41  | endogenous detected |
| 1433G | P61981 | HUMAN | YLAEVATGEK     | 2.y8.1.0 | 51428  | 166745 | 0.6797 | 0.26 | 0.79  | endogenous detected |
| 1433S | P31947 | HUMAN | GEELSCEER      | 2.y5.1.0 | 9028   | 4567   | 0.8669 | 1.16 | 3.49  | endogenous detected |
| 1433S | P31947 | HUMAN | NLLSVAYK       | 2.y6.1.0 | 30297  | 672631 | 0.9355 | 2.04 | 6.13  | endogenous detected |
| 1433S | P31947 | HUMAN | VLSSIEQK       | 2.y6.1.0 | 142575 | 19204  | 0.9203 | 2.82 | 8.45  | endogenous detected |
| 1433S | P31947 | HUMAN | YLAEVATGDDK    | 2.y6.1.0 | 8704   | 9831   | 0.9097 | 6.10 | 18.30 | endogenous detected |

**Supplemental Table 21. Peptides, masses and transition ions selected for scheduled MRM analysis for all targeted peptides**

| Compound                          | Start Time (min) | End Time (min) | Precursor (m/z) | Product (m/z) | Collision Energy (V) |
|-----------------------------------|------------------|----------------|-----------------|---------------|----------------------|
| AAHLC[+57.0]AEAALR(+3)            | 32.02            | 40.02          | 394.8731        | 630.357       | 17.3                 |
| AAHLC[+57.0]AEAALR(+3)            | 32.02            | 40.02          | 394.8731        | 559.3198      | 17.3                 |
| AAHLC[+57.0]AEAALR(+3)            | 32.02            | 40.02          | 394.8731        | 430.2772      | 17.3                 |
| AIAELGIYPAVDPLDSTSR(+2)           | 52.78            | 60.78          | 994.5204        | 1320.643      | 32.7                 |
| AIAELGIYPAVDPLDSTSR(+2)           | 52.78            | 60.78          | 994.5204        | 1157.58       | 32.7                 |
| AIAELGIYPAVDPLDSTSR(+2)           | 52.78            | 60.78          | 994.5204        | 1060.527      | 32.7                 |
| AIAELGIYPAVDPLDSTSR(+2)           | 52.78            | 60.78          | 994.5204        | 775.3945      | 32.7                 |
| AIWNVINWENVTER(+2)                | 55.6             | 63.6           | 872.4443        | 1160.569      | 29.1                 |
| AIWNVINWENVTER(+2)                | 55.6             | 63.6           | 872.4443        | 1047.485      | 29.1                 |
| AIWNVINWENVTER(+2)                | 55.6             | 63.6           | 872.4443        | 933.4425      | 29.1                 |
| ALYEAGER (heavy)(+2)              | 29.89            | 37.89          | 459.7314        | 847.4184      | 16.5                 |
| ALYEAGER (heavy)(+2)              | 29.89            | 37.89          | 459.7314        | 734.3343      | 16.5                 |
| ALYEAGER (heavy)(+2)              | 29.89            | 37.89          | 459.7314        | 571.271       | 16.5                 |
| ALYEAGER(+2)                      | 29.89            | 37.89          | 454.7272        | 837.4101      | 16.5                 |
| ALYEAGER(+2)                      | 29.89            | 37.89          | 454.7272        | 724.326       | 16.5                 |
| ALYEAGER(+2)                      | 29.89            | 37.89          | 454.7272        | 561.2627      | 16.5                 |
| APIIAVTR(+2)                      | 36.29            | 44.29          | 420.7687        | 769.4931      | 15.5                 |
| APIIAVTR(+2)                      | 36.29            | 44.29          | 420.7687        | 672.4403      | 15.5                 |
| APIIAVTR(+2)                      | 36.29            | 44.29          | 420.7687        | 559.3562      | 15.5                 |
| APIIAVTR(+2)                      | 36.29            | 44.29          | 420.7687        | 446.2722      | 15.5                 |
| AVTSANIQEFAGC[+57.0]K (heavy)(+2) | 39.98            | 47.98          | 751.3742        | 1072.519      | 25.4                 |
| AVTSANIQEFAGC[+57.0]K (heavy)(+2) | 39.98            | 47.98          | 751.3742        | 958.4758      | 25.4                 |
| AVTSANIQEFAGC[+57.0]K (heavy)(+2) | 39.98            | 47.98          | 751.3742        | 845.3917      | 25.4                 |
| AVTSANIQEFAGC[+57.0]K(+2)         | 39.98            | 47.98          | 748.3641        | 1066.499      | 25.4                 |
| AVTSANIQEFAGC[+57.0]K(+2)         | 39.98            | 47.98          | 748.3641        | 952.4557      | 25.4                 |
| AVTSANIQEFAGC[+57.0]K(+2)         | 39.98            | 47.98          | 748.3641        | 839.3716      | 25.4                 |
| C[+57.0]C[+57.0]SGAIIVLTK(+2)     | 41.14            | 49.14          | 611.3201        | 814.5397      | 21.2                 |
| C[+57.0]C[+57.0]SGAIIVLTK(+2)     | 41.14            | 49.14          | 611.3201        | 686.4811      | 21.2                 |
| C[+57.0]C[+57.0]SGAIIVLTK(+2)     | 41.14            | 49.14          | 611.3201        | 573.397       | 21.2                 |
| C[+57.0]C[+57.0]SGAIIVLTK(+2)     | 41.14            | 49.14          | 611.3201        | 460.313       | 21.2                 |
| C[+57.0]QQEYFGER(+2)              | 32.94            | 40.94          | 608.7562        | 928.4159      | 21.2                 |
| C[+57.0]QQEYFGER(+2)              | 32.94            | 40.94          | 608.7562        | 800.3573      | 21.2                 |
| C[+57.0]QQEYFGER(+2)              | 32.94            | 40.94          | 608.7562        | 671.3148      | 21.2                 |
| C[+57.0]WGPGSEDC[+57.0]QTLTK(+2)  | 37.33            | 45.33          | 819.848         | 1235.557      | 27.5                 |
| C[+57.0]WGPGSEDC[+57.0]QTLTK(+2)  | 37.33            | 45.33          | 819.848         | 1081.483      | 27.5                 |
| C[+57.0]WGPGSEDC[+57.0]QTLTK(+2)  | 37.33            | 45.33          | 819.848         | 994.451       | 27.5                 |
| C[+57.0]WGPGSEDC[+57.0]QTLTK(+2)  | 37.33            | 45.33          | 819.848         | 865.4084      | 27.5                 |
| DGLILTSR(+2)                      | 39.21            | 47.21          | 437.7533        | 702.4509      | 16                   |

|                             |       |       |          |          |      |
|-----------------------------|-------|-------|----------|----------|------|
| DGLILTSR(+2)                | 39.21 | 47.21 | 437.7533 | 589.3668 | 16   |
| DGLILTSR(+2)                | 39.21 | 47.21 | 437.7533 | 476.2827 | 16   |
| DIC[+57.0]ADPK(+2)          | 25.64 | 33.64 | 409.6893 | 703.3443 | 15.2 |
| DIC[+57.0]ADPK(+2)          | 25.64 | 33.64 | 409.6893 | 590.2603 | 15.2 |
| DIC[+57.0]ADPK(+2)          | 25.64 | 33.64 | 409.6893 | 430.2296 | 15.2 |
| DIC[+57.0]ADPK(+2)          | 25.64 | 33.64 | 409.6893 | 359.1925 | 15.2 |
| DLKPSNLAVNEDC[+57.0]ELK(+3) | 39.63 | 47.63 | 615.6401 | 907.3826 | 25.7 |
| DLKPSNLAVNEDC[+57.0]ELK(+3) | 39.63 | 47.63 | 615.6401 | 793.3396 | 25.7 |
| DLKPSNLAVNEDC[+57.0]ELK(+3) | 39.63 | 47.63 | 615.6401 | 664.2971 | 25.7 |
| EAEALLQLNGDFLVR(+2)         | 54.6  | 62.6  | 844.4543 | 1174.658 | 28.2 |
| EAEALLQLNGDFLVR(+2)         | 54.6  | 62.6  | 844.4543 | 1061.574 | 28.2 |
| EAEALLQLNGDFLVR(+2)         | 54.6  | 62.6  | 844.4543 | 933.5152 | 28.2 |
| EAVTVAVK(+2)                | 31.11 | 39.11 | 408.7449 | 616.4028 | 15.2 |
| EAVTVAVK(+2)                | 31.11 | 39.11 | 408.7449 | 517.3344 | 15.2 |
| EAVTVAVK(+2)                | 31.11 | 39.11 | 408.7449 | 416.2867 | 15.2 |
| ELAVQIQK(+2)                | 35.39 | 43.39 | 464.7767 | 686.4196 | 16.8 |
| ELAVQIQK(+2)                | 35.39 | 43.39 | 464.7767 | 615.3824 | 16.8 |
| ELAVQIQK(+2)                | 35.39 | 43.39 | 464.7767 | 516.314  | 16.8 |
| ELC[+57.0]LDPK(+2)          | 35.45 | 43.45 | 437.7206 | 745.3913 | 16   |
| ELC[+57.0]LDPK(+2)          | 35.45 | 43.45 | 437.7206 | 632.3072 | 16   |
| ELC[+57.0]LDPK(+2)          | 35.45 | 43.45 | 437.7206 | 472.2766 | 16   |
| ELIFQETAR(+2)               | 41.24 | 49.24 | 553.7957 | 864.4574 | 19.5 |
| ELIFQETAR(+2)               | 41.24 | 49.24 | 553.7957 | 751.3733 | 19.5 |
| ELIFQETAR(+2)               | 41.24 | 49.24 | 553.7957 | 604.3049 | 19.5 |
| ENWVQR(+2)                  | 30.85 | 38.85 | 416.209  | 702.3682 | 15.4 |
| ENWVQR(+2)                  | 30.85 | 38.85 | 416.209  | 588.3253 | 15.4 |
| ENWVQR(+2)                  | 30.85 | 38.85 | 416.209  | 402.2459 | 15.4 |
| ENWVQR(+2)                  | 30.85 | 38.85 | 416.209  | 430.1721 | 15.4 |
| ENWVQR(+2)                  | 30.85 | 38.85 | 416.209  | 529.2405 | 15.4 |
| EQIYDVYR(+2)                | 38.48 | 46.48 | 543.2667 | 828.425  | 19.2 |
| EQIYDVYR(+2)                | 38.48 | 46.48 | 543.2667 | 715.341  | 19.2 |
| EQIYDVYR(+2)                | 38.48 | 46.48 | 543.2667 | 552.2776 | 19.2 |
| FMDVYQR(+2)                 | 37.61 | 45.61 | 479.7262 | 811.3767 | 17.3 |
| FMDVYQR(+2)                 | 37.61 | 45.61 | 479.7262 | 680.3362 | 17.3 |
| FMDVYQR(+2)                 | 37.61 | 45.61 | 479.7262 | 565.3093 | 17.3 |
| FSNNPALC[+57.0]NVESIQWR(+2) | 47.73 | 55.73 | 967.9625 | 1472.731 | 31.9 |
| FSNNPALC[+57.0]NVESIQWR(+2) | 47.73 | 55.73 | 967.9625 | 1304.642 | 31.9 |
| FSNNPALC[+57.0]NVESIQWR(+2) | 47.73 | 55.73 | 967.9625 | 1191.558 | 31.9 |
| FSNNPALC[+57.0]NVESIQWR(+2) | 47.73 | 55.73 | 967.9625 | 1031.527 | 31.9 |
| FTQAGSEVSALLGR(+2)          | 46.46 | 54.46 | 718.3806 | 988.5422 | 24.5 |
| FTQAGSEVSALLGR(+2)          | 46.46 | 54.46 | 718.3806 | 931.5207 | 24.5 |
| FTQAGSEVSALLGR(+2)          | 46.46 | 54.46 | 718.3806 | 844.4887 | 24.5 |
| GDLGIEIPA EK(+2)            | 42.99 | 50.99 | 571.3086 | 856.4775 | 20   |

|                             |       |       |          |          |      |
|-----------------------------|-------|-------|----------|----------|------|
| GDLGIEIPAЕК(+2)             | 42.99 | 50.99 | 571.3086 | 799.456  | 20   |
| GDLGIEIPAЕК(+2)             | 42.99 | 50.99 | 571.3086 | 686.3719 | 20   |
| GDLGIEIPAЕК(+2)             | 42.99 | 50.99 | 571.3086 | 444.2453 | 20   |
| GDVTAQIALQPALK(+2)          | 43.81 | 51.81 | 712.909  | 981.6091 | 24.3 |
| GDVTAQIALQPALK(+2)          | 43.81 | 51.81 | 712.909  | 853.5506 | 24.3 |
| GDVTAQIALQPALK(+2)          | 43.81 | 51.81 | 712.909  | 740.4665 | 24.3 |
| GDVTAQIALQPALK(+2)          | 43.81 | 51.81 | 712.909  | 428.2867 | 24.3 |
| GDYPLEAVR(+2)               | 38.82 | 46.82 | 510.2615 | 847.4672 | 18.2 |
| GDYPLEAVR(+2)               | 38.82 | 46.82 | 510.2615 | 684.4039 | 18.2 |
| GDYPLEAVR(+2)               | 38.82 | 46.82 | 510.2615 | 587.3511 | 18.2 |
| GEELSC[+57.0]EER(+2)        | 27.06 | 35.06 | 554.7324 | 793.3509 | 19.5 |
| GEELSC[+57.0]EER(+2)        | 27.06 | 35.06 | 554.7324 | 680.2668 | 19.5 |
| GEELSC[+57.0]EER(+2)        | 27.06 | 35.06 | 554.7324 | 593.2348 | 19.5 |
| GELLEAIK(+2)                | 40.69 | 48.69 | 436.758  | 686.4447 | 16   |
| GELLEAIK(+2)                | 40.69 | 48.69 | 436.758  | 573.3606 | 16   |
| GELLEAIK(+2)                | 40.69 | 48.69 | 436.758  | 460.2766 | 16   |
| GEPWFHGK(+2)                | 33.67 | 41.67 | 479.2325 | 771.3937 | 17.3 |
| GEPWFHGK(+2)                | 33.67 | 41.67 | 479.2325 | 674.3409 | 17.3 |
| GEPWFHGK(+2)                | 33.67 | 41.67 | 479.2325 | 488.2616 | 17.3 |
| GSGTAEVELK(+2)              | 30.85 | 38.85 | 495.7587 | 789.4353 | 17.8 |
| GSGTAEVELK(+2)              | 30.85 | 38.85 | 495.7587 | 688.3876 | 17.8 |
| GSGTAEVELK(+2)              | 30.85 | 38.85 | 495.7587 | 617.3505 | 17.8 |
| GTDVNVFNTILTTR (heavy)(+2)  | 52.05 | 60.05 | 780.9164 | 1074.618 | 26.2 |
| GTDVNVFNTILTTR (heavy)(+2)  | 52.05 | 60.05 | 780.9164 | 975.5497 | 26.2 |
| GTDVNVFNTILTTR (heavy)(+2)  | 52.05 | 60.05 | 780.9164 | 828.4813 | 26.2 |
| GTDVNVFNTILTTR(+2)          | 52.05 | 60.05 | 775.9123 | 1064.61  | 26.2 |
| GTDVNVFNTILTTR(+2)          | 52.05 | 60.05 | 775.9123 | 965.5415 | 26.2 |
| GTDVNVFNTILTTR(+2)          | 52.05 | 60.05 | 775.9123 | 818.473  | 26.2 |
| GVAINFVK(+2)                | 40.62 | 48.62 | 424.2554 | 691.4137 | 15.6 |
| GVAINFVK(+2)                | 40.62 | 48.62 | 424.2554 | 620.3766 | 15.6 |
| GVAINFVK(+2)                | 40.62 | 48.62 | 424.2554 | 507.2926 | 15.6 |
| GVDEATIIDILTK (heavy)(+2)   | 56.82 | 64.82 | 698.3947 | 924.5856 | 23.7 |
| GVDEATIIDILTK (heavy)(+2)   | 56.82 | 64.82 | 698.3947 | 823.5379 | 23.7 |
| GVDEATIIDILTK (heavy)(+2)   | 56.82 | 64.82 | 698.3947 | 710.4538 | 23.7 |
| GVDEATIIDILTK(+2)           | 56.82 | 64.82 | 694.3876 | 916.5714 | 23.7 |
| GVDEATIIDILTK(+2)           | 56.82 | 64.82 | 694.3876 | 815.5237 | 23.7 |
| GVDEATIIDILTK(+2)           | 56.82 | 64.82 | 694.3876 | 702.4396 | 23.7 |
| HENVIGLLDVFTPAR (heavy)(+3) | 54.46 | 62.46 | 564.3099 | 815.4285 | 23.6 |
| HENVIGLLDVFTPAR (heavy)(+3) | 54.46 | 62.46 | 564.3099 | 700.4016 | 23.6 |
| HENVIGLLDVFTPAR (heavy)(+3) | 54.46 | 62.46 | 564.3099 | 601.3332 | 23.6 |
| HENVIGLLDVFTPAR (heavy)(+3) | 54.46 | 62.46 | 564.3099 | 353.2171 | 23.6 |
| HENVIGLLDVFTPAR(+3)         | 54.46 | 62.46 | 560.9738 | 805.4203 | 23.6 |
| HENVIGLLDVFTPAR(+3)         | 54.46 | 62.46 | 560.9738 | 690.3933 | 23.6 |



|                                 |       |       |          |          |      |
|---------------------------------|-------|-------|----------|----------|------|
| HENVIGLLDVFTPAR(+3)             | 54.46 | 62.46 | 560.9738 | 591.3249 | 23.6 |
| HENVIGLLDVFTPAR(+3)             | 54.46 | 62.46 | 560.9738 | 343.2088 | 23.6 |
| HLFVQDPQTC[+57.0]K(+2)          | 33.22 | 41.22 | 686.8375 | 975.4564 | 23.5 |
| HLFVQDPQTC[+57.0]K(+2)          | 33.22 | 41.22 | 686.8375 | 876.388  | 23.5 |
| HLFVQDPQTC[+57.0]K(+2)          | 33.22 | 41.22 | 686.8375 | 748.3294 | 23.5 |
| HLFVQDPQTC[+57.0]K(+2)          | 33.22 | 41.22 | 686.8375 | 633.3025 | 23.5 |
| HLLLVDPEGVVR(+2)                | 44.61 | 52.61 | 673.8932 | 983.552  | 23.1 |
| HLLLVDPEGVVR(+2)                | 44.61 | 52.61 | 673.8932 | 870.468  | 23.1 |
| HLLLVDPEGVVR(+2)                | 44.61 | 52.61 | 673.8932 | 771.3995 | 23.1 |
| HLLLVDPEGVVR(+2)                | 44.61 | 52.61 | 673.8932 | 656.3726 | 23.1 |
| HSQPWQVLVASR (heavy)(+2)        | 42.94 | 50.94 | 707.3883 | 1061.62  | 24   |
| HSQPWQVLVASR (heavy)(+2)        | 42.94 | 50.94 | 707.3883 | 964.567  | 24   |
| HSQPWQVLVASR (heavy)(+2)        | 42.94 | 50.94 | 707.3883 | 778.4877 | 24   |
| HSQPWQVLVASR (heavy)(+3)        | 42.94 | 50.94 | 471.9279 | 1061.62  | 20.1 |
| HSQPWQVLVASR (heavy)(+3)        | 42.94 | 50.94 | 471.9279 | 778.4877 | 20.1 |
| HSQPWQVLVASR (heavy)(+3)        | 42.94 | 50.94 | 471.9279 | 650.4291 | 20.1 |
| HSQPWQVLVASR (heavy)(+3)        | 42.94 | 50.94 | 471.9279 | 551.3607 | 20.1 |
| HSQPWQVLVASR(+2)                | 42.94 | 50.94 | 704.3782 | 1055.6   | 24   |
| HSQPWQVLVASR(+2)                | 42.94 | 50.94 | 704.3782 | 958.5469 | 24   |
| HSQPWQVLVASR(+2)                | 42.94 | 50.94 | 704.3782 | 772.4676 | 24   |
| HSQPWQVLVASR(+3)                | 42.94 | 50.94 | 469.9212 | 1055.6   | 20.1 |
| HSQPWQVLVASR(+3)                | 42.94 | 50.94 | 469.9212 | 772.4676 | 20.1 |
| HSQPWQVLVASR(+3)                | 42.94 | 50.94 | 469.9212 | 644.409  | 20.1 |
| HSQPWQVLVASR(+3)                | 42.94 | 50.94 | 469.9212 | 545.3406 | 20.1 |
| HSSGC[+57.0]AFLSVK(+2)          | 34.74 | 42.74 | 596.7926 | 881.455  | 20.8 |
| HSSGC[+57.0]AFLSVK(+2)          | 34.74 | 42.74 | 596.7926 | 824.4335 | 20.8 |
| HSSGC[+57.0]AFLSVK(+2)          | 34.74 | 42.74 | 596.7926 | 664.4028 | 20.8 |
| HSSGC[+57.0]AFLSVK(+3)          | 34.74 | 42.74 | 398.1975 | 664.4028 | 17.4 |
| HSSGC[+57.0]AFLSVK(+3)          | 34.74 | 42.74 | 398.1975 | 593.3657 | 17.4 |
| HSSGC[+57.0]AFLSVK(+3)          | 34.74 | 42.74 | 398.1975 | 446.2973 | 17.4 |
| IADFGLAR(+2)                    | 40.32 | 48.32 | 431.7427 | 749.3941 | 15.9 |
| IADFGLAR(+2)                    | 40.32 | 48.32 | 431.7427 | 678.357  | 15.9 |
| IADFGLAR(+2)                    | 40.32 | 48.32 | 431.7427 | 563.33   | 15.9 |
| IADPEHDHTGFLTEYVATR (heavy)(+3) | 42.71 | 50.71 | 728.0195 | 962.5181 | 29.8 |
| IADPEHDHTGFLTEYVATR (heavy)(+3) | 42.71 | 50.71 | 728.0195 | 849.434  | 29.8 |
| IADPEHDHTGFLTEYVATR (heavy)(+3) | 42.71 | 50.71 | 728.0195 | 748.3863 | 29.8 |
| IADPEHDHTGFLTEYVATR(+3)         | 42.71 | 50.71 | 724.6834 | 952.5098 | 29.8 |
| IADPEHDHTGFLTEYVATR(+3)         | 42.71 | 50.71 | 724.6834 | 839.4258 | 29.8 |
| IADPEHDHTGFLTEYVATR(+3)         | 42.71 | 50.71 | 724.6834 | 738.3781 | 29.8 |
| IC[+57.0]DFGLAR(+2)             | 40.13 | 48.13 | 476.2395 | 838.3876 | 17.2 |
| IC[+57.0]DFGLAR(+2)             | 40.13 | 48.13 | 476.2395 | 678.357  | 17.2 |
| IC[+57.0]DFGLAR(+2)             | 40.13 | 48.13 | 476.2395 | 563.33   | 17.2 |
| IINSFTQDDIEK(+2)                | 39.77 | 47.77 | 711.8592 | 995.468  | 24.3 |

|                              |       |       |          |          |      |
|------------------------------|-------|-------|----------|----------|------|
| IINSFTQDDIEK(+2)             | 39.77 | 47.77 | 711.8592 | 848.3996 | 24.3 |
| IINSFTQDDIEK(+2)             | 39.77 | 47.77 | 711.8592 | 747.3519 | 24.3 |
| ILDFGLAR(+2)                 | 46.29 | 54.29 | 452.7662 | 791.441  | 16.5 |
| ILDFGLAR(+2)                 | 46.29 | 54.29 | 452.7662 | 678.357  | 16.5 |
| ILDFGLAR(+2)                 | 46.29 | 54.29 | 452.7662 | 563.33   | 16.5 |
| ILGEGSFSTVVLAR(+2)           | 48.51 | 56.51 | 724.909  | 979.5571 | 24.7 |
| ILGEGSFSTVVLAR(+2)           | 48.51 | 56.51 | 724.909  | 892.5251 | 24.7 |
| ILGEGSFSTVVLAR(+2)           | 48.51 | 56.51 | 724.909  | 745.4567 | 24.7 |
| IPALDPEK(+2)                 | 35.75 | 43.75 | 441.7502 | 769.409  | 16.2 |
| IPALDPEK(+2)                 | 35.75 | 43.75 | 441.7502 | 672.3563 | 16.2 |
| IPALDPEK(+2)                 | 35.75 | 43.75 | 441.7502 | 601.3192 | 16.2 |
| IPALDPEK(+2)                 | 35.75 | 43.75 | 441.7502 | 488.2351 | 16.2 |
| IPALDPEK(+2)                 | 35.75 | 43.75 | 441.7502 | 373.2082 | 16.2 |
| IPLNLQIIR(+2)                | 48.3  | 56.3  | 604.8717 | 1095.652 | 21.1 |
| IPLNLQIIR(+2)                | 48.3  | 56.3  | 604.8717 | 885.5152 | 21.1 |
| IPLNLQIIR(+2)                | 48.3  | 56.3  | 604.8717 | 756.4726 | 21.1 |
| IPLNLQIIR(+2)                | 48.3  | 56.3  | 604.8717 | 642.4297 | 21.1 |
| ISQGLGLQDFDLIR(+2)           | 54.09 | 62.09 | 787.9305 | 1076.573 | 26.5 |
| ISQGLGLQDFDLIR(+2)           | 54.09 | 62.09 | 787.9305 | 1019.552 | 26.5 |
| ISQGLGLQDFDLIR(+2)           | 54.09 | 62.09 | 787.9305 | 906.468  | 26.5 |
| ITLDNAYMEK(+2)               | 39.8  | 47.8  | 599.2946 | 870.3662 | 20.9 |
| ITLDNAYMEK(+2)               | 39.8  | 47.8  | 599.2946 | 755.3393 | 20.9 |
| ITLDNAYMEK(+2)               | 39.8  | 47.8  | 599.2946 | 641.2963 | 20.9 |
| ITLDNAYMEK(+2)               | 39.8  | 47.8  | 599.2946 | 570.2592 | 20.9 |
| ITSGPFEPDLYK(+2)             | 43.97 | 51.97 | 683.8481 | 1008.504 | 23.4 |
| ITSGPFEPDLYK(+2)             | 43.97 | 51.97 | 683.8481 | 911.4509 | 23.4 |
| ITSGPFEPDLYK(+2)             | 43.97 | 51.97 | 683.8481 | 764.3825 | 23.4 |
| ITSGPFEPDLYK(+2)             | 43.97 | 51.97 | 683.8481 | 635.3399 | 23.4 |
| IVGGWEC[+57.0]EK (heavy)(+2) | 35.09 | 43.09 | 542.2654 | 814.3495 | 19.1 |
| IVGGWEC[+57.0]EK (heavy)(+2) | 35.09 | 43.09 | 542.2654 | 757.3281 | 19.1 |
| IVGGWEC[+57.0]EK (heavy)(+2) | 35.09 | 43.09 | 542.2654 | 571.2488 | 19.1 |
| IVGGWEC[+57.0]EK(+2)         | 35.09 | 43.09 | 539.2553 | 808.3294 | 19.1 |
| IVGGWEC[+57.0]EK(+2)         | 35.09 | 43.09 | 539.2553 | 751.308  | 19.1 |
| IVGGWEC[+57.0]EK(+2)         | 35.09 | 43.09 | 539.2553 | 565.2286 | 19.1 |
| IYISANR(+2)                  | 31.55 | 39.55 | 418.7349 | 723.3784 | 15.5 |
| IYISANR(+2)                  | 31.55 | 39.55 | 418.7349 | 560.3151 | 15.5 |
| IYISANR(+2)                  | 31.55 | 39.55 | 418.7349 | 447.231  | 15.5 |
| LDGPGIWSDWSTPR(+2)           | 50.56 | 58.56 | 793.8835 | 1034.469 | 26.7 |
| LDGPGIWSDWSTPR(+2)           | 50.56 | 58.56 | 793.8835 | 848.3897 | 26.7 |
| LDGPGIWSDWSTPR(+2)           | 50.56 | 58.56 | 793.8835 | 761.3577 | 26.7 |
| LDGPGIWSDWSTPR(+2)           | 50.56 | 58.56 | 793.8835 | 646.3307 | 26.7 |
| LDIDSPITAR(+2)               | 41.38 | 49.38 | 599.3273 | 856.4523 | 20.9 |
| LDIDSPITAR(+2)               | 41.38 | 49.38 | 599.3273 | 741.4254 | 20.9 |

|                          |       |       |          |          |      |
|--------------------------|-------|-------|----------|----------|------|
| LDIDSPITAR(+2)           | 41.38 | 49.38 | 599.3273 | 654.3933 | 20.9 |
| LDIDSPITAR(+2)           | 41.38 | 49.38 | 599.3273 | 557.3406 | 20.9 |
| LDNVLLDADGHIK(+2)        | 42.88 | 50.88 | 711.883  | 981.5364 | 24.3 |
| LDNVLLDADGHIK(+2)        | 42.88 | 50.88 | 711.883  | 868.4523 | 24.3 |
| LDNVLLDADGHIK(+2)        | 42.88 | 50.88 | 711.883  | 755.3682 | 24.3 |
| LDNVLLDADGHIK(+3)        | 42.88 | 50.88 | 474.9244 | 755.3682 | 20.3 |
| LDNVLLDADGHIK(+3)        | 42.88 | 50.88 | 474.9244 | 640.3413 | 20.3 |
| LDNVLLDADGHIK(+3)        | 42.88 | 50.88 | 474.9244 | 569.3042 | 20.3 |
| LENSPLGEALR(+2)          | 41.24 | 49.24 | 599.825  | 842.473  | 20.9 |
| LENSPLGEALR(+2)          | 41.24 | 49.24 | 599.825  | 755.441  | 20.9 |
| LENSPLGEALR(+2)          | 41.24 | 49.24 | 599.825  | 658.3883 | 20.9 |
| LHQQHPLTLK(+3)           | 27.75 | 35.75 | 405.5717 | 708.4403 | 17.7 |
| LHQQHPLTLK(+3)           | 27.75 | 35.75 | 405.5717 | 571.3814 | 17.7 |
| LHQQHPLTLK(+3)           | 27.75 | 35.75 | 405.5717 | 474.3286 | 17.7 |
| LSEPAELTDAVK (heavy)(+2) | 40.52 | 48.52 | 639.8478 | 949.5296 | 22   |
| LSEPAELTDAVK (heavy)(+2) | 40.52 | 48.52 | 639.8478 | 852.4769 | 22   |
| LSEPAELTDAVK (heavy)(+2) | 40.52 | 48.52 | 639.8478 | 781.4397 | 22   |
| LSEPAELTDAVK (heavy)(+2) | 40.52 | 48.52 | 639.8478 | 652.3971 | 22   |
| LSEPAELTDAVK(+2)         | 40.52 | 48.52 | 636.8377 | 943.5095 | 22   |
| LSEPAELTDAVK(+2)         | 40.52 | 48.52 | 636.8377 | 846.4567 | 22   |
| LSEPAELTDAVK(+2)         | 40.52 | 48.52 | 636.8377 | 775.4196 | 22   |
| LSEPAELTDAVK(+2)         | 40.52 | 48.52 | 636.8377 | 646.377  | 22   |
| LSRPFQSIIHAK(+3)         | 38.7  | 46.7  | 466.2735 | 1040.589 | 20   |
| LSRPFQSIIHAK(+3)         | 38.7  | 46.7  | 466.2735 | 668.409  | 20   |
| LSRPFQSIIHAK(+3)         | 38.7  | 46.7  | 466.2735 | 581.377  | 20   |
| LSRPFQSIIHAK(+3)         | 38.7  | 46.7  | 466.2735 | 468.2929 | 20   |
| LTFQLEPNPHTK(+2)         | 39.92 | 47.92 | 712.8803 | 1063.553 | 24.3 |
| LTFQLEPNPHTK(+2)         | 39.92 | 47.92 | 712.8803 | 935.4945 | 24.3 |
| LTFQLEPNPHTK(+2)         | 39.92 | 47.92 | 712.8803 | 822.4104 | 24.3 |
| LTFQLEPNPHTK(+2)         | 39.92 | 47.92 | 712.8803 | 693.3678 | 24.3 |
| LTFQLEPNPHTK(+2)         | 39.92 | 47.92 | 712.8803 | 482.2722 | 24.3 |
| LTFQLEPNPHTK(+3)         | 39.92 | 47.92 | 475.5893 | 693.3678 | 20.4 |
| LTFQLEPNPHTK(+3)         | 39.92 | 47.92 | 475.5893 | 596.3151 | 20.4 |
| LTFQLEPNPHTK(+3)         | 39.92 | 47.92 | 475.5893 | 482.2722 | 20.4 |
| LVGTPGAELLK(+2)          | 42.06 | 50.06 | 549.3319 | 727.4349 | 19.4 |
| LVGTPGAELLK(+2)          | 42.06 | 50.06 | 549.3319 | 630.3821 | 19.4 |
| LVGTPGAELLK(+2)          | 42.06 | 50.06 | 549.3319 | 573.3606 | 19.4 |
| LVIIESDLER (heavy)(+2)   | 43.85 | 51.85 | 598.8417 | 871.4395 | 20.7 |
| LVIIESDLER (heavy)(+2)   | 43.85 | 51.85 | 598.8417 | 758.3554 | 20.7 |
| LVIIESDLER (heavy)(+2)   | 43.85 | 51.85 | 598.8417 | 629.3128 | 20.7 |
| LVIIESDLER(+2)           | 43.85 | 51.85 | 593.8375 | 861.4312 | 20.7 |
| LVIIESDLER(+2)           | 43.85 | 51.85 | 593.8375 | 748.3472 | 20.7 |
| LVIIESDLER(+2)           | 43.85 | 51.85 | 593.8375 | 619.3046 | 20.7 |

|                           |       |       |          |          |      |
|---------------------------|-------|-------|----------|----------|------|
| LVKPGNQNTQVTEAWNK(+3)     | 35.3  | 43.3  | 643.0059 | 847.4308 | 26.7 |
| LVKPGNQNTQVTEAWNK(+3)     | 35.3  | 43.3  | 643.0059 | 748.3624 | 26.7 |
| LVKPGNQNTQVTEAWNK(+3)     | 35.3  | 43.3  | 643.0059 | 647.3148 | 26.7 |
| LVLEVAQHLGESTVR(+3)       | 44.09 | 52.09 | 550.9773 | 761.4152 | 23.2 |
| LVLEVAQHLGESTVR(+3)       | 44.09 | 52.09 | 550.9773 | 648.3311 | 23.2 |
| LVLEVAQHLGESTVR(+3)       | 44.09 | 52.09 | 550.9773 | 591.3097 | 23.2 |
| NITYEELR(+2)              | 37.31 | 45.31 | 519.2667 | 810.3992 | 18.5 |
| NITYEELR(+2)              | 37.31 | 45.31 | 519.2667 | 709.3515 | 18.5 |
| NITYEELR(+2)              | 37.31 | 45.31 | 519.2667 | 546.2882 | 18.5 |
| NLLSVAYK (heavy)(+2)      | 41.23 | 49.23 | 458.2731 | 688.412  | 16.5 |
| NLLSVAYK (heavy)(+2)      | 41.23 | 49.23 | 458.2731 | 575.3279 | 16.5 |
| NLLSVAYK (heavy)(+2)      | 41.23 | 49.23 | 458.2731 | 488.2959 | 16.5 |
| NLLSVAYK(+2)              | 41.23 | 49.23 | 454.266  | 680.3978 | 16.5 |
| NLLSVAYK(+2)              | 41.23 | 49.23 | 454.266  | 567.3137 | 16.5 |
| NLLSVAYK(+2)              | 41.23 | 49.23 | 454.266  | 480.2817 | 16.5 |
| NLQEILHGAVR (heavy)(+2)   | 42.47 | 50.47 | 628.3643 | 900.5357 | 21.7 |
| NLQEILHGAVR (heavy)(+2)   | 42.47 | 50.47 | 628.3643 | 771.4931 | 21.7 |
| NLQEILHGAVR (heavy)(+2)   | 42.47 | 50.47 | 628.3643 | 658.409  | 21.7 |
| NLQEILHGAVR(+2)           | 42.47 | 50.47 | 625.3542 | 894.5156 | 21.7 |
| NLQEILHGAVR(+2)           | 42.47 | 50.47 | 625.3542 | 765.473  | 21.7 |
| NLQEILHGAVR(+2)           | 42.47 | 50.47 | 625.3542 | 652.3889 | 21.7 |
| NNQLALTLIDTNR (heavy)(+2) | 46.85 | 54.85 | 746.4147 | 1022.594 | 25.2 |
| NNQLALTLIDTNR (heavy)(+2) | 46.85 | 54.85 | 746.4147 | 951.5565 | 25.2 |
| NNQLALTLIDTNR (heavy)(+2) | 46.85 | 54.85 | 746.4147 | 838.4724 | 25.2 |
| NNQLALTLIDTNR(+2)         | 46.85 | 54.85 | 743.4046 | 1016.573 | 25.2 |
| NNQLALTLIDTNR(+2)         | 46.85 | 54.85 | 743.4046 | 945.5364 | 25.2 |
| NNQLALTLIDTNR(+2)         | 46.85 | 54.85 | 743.4046 | 832.4523 | 25.2 |
| NVTELNEPLSNEER(+2)        | 38.1  | 46.1  | 822.3972 | 1087.501 | 27.6 |
| NVTELNEPLSNEER(+2)        | 38.1  | 46.1  | 822.3972 | 973.4585 | 27.6 |
| NVTELNEPLSNEER(+2)        | 38.1  | 46.1  | 822.3972 | 844.4159 | 27.6 |
| NYDLSFLK (heavy)(+2)      | 46.95 | 54.95 | 503.271  | 891.4918 | 17.9 |
| NYDLSFLK (heavy)(+2)      | 46.95 | 54.95 | 503.271  | 728.4284 | 17.9 |
| NYDLSFLK (heavy)(+2)      | 46.95 | 54.95 | 503.271  | 613.4015 | 17.9 |
| NYDLSFLK(+2)              | 46.95 | 54.95 | 500.2609 | 885.4716 | 17.9 |
| NYDLSFLK(+2)              | 46.95 | 54.95 | 500.2609 | 722.4083 | 17.9 |
| NYDLSFLK(+2)              | 46.95 | 54.95 | 500.2609 | 607.3814 | 17.9 |
| NYLQSLPSK(+2)             | 37.81 | 45.81 | 525.2849 | 772.4563 | 18.7 |
| NYLQSLPSK(+2)             | 37.81 | 45.81 | 525.2849 | 659.3723 | 18.7 |
| NYLQSLPSK(+2)             | 37.81 | 45.81 | 525.2849 | 531.3137 | 18.7 |
| NYLQSLPSK(+2)             | 37.81 | 45.81 | 525.2849 | 331.1976 | 18.7 |
| QFEELTLGEFLK(+2)          | 55.57 | 63.57 | 727.3823 | 1049.588 | 24.7 |
| QFEELTLGEFLK(+2)          | 55.57 | 63.57 | 727.3823 | 920.5451 | 24.7 |
| QFEELTLGEFLK(+2)          | 55.57 | 63.57 | 727.3823 | 807.4611 | 24.7 |

|                               |       |       |          |          |      |
|-------------------------------|-------|-------|----------|----------|------|
| QLEDELVSLQK (heavy)(+2)       | 43.7  | 51.7  | 655.3581 | 939.5237 | 22.4 |
| QLEDELVSLQK (heavy)(+2)       | 43.7  | 51.7  | 655.3581 | 824.4967 | 22.4 |
| QLEDELVSLQK (heavy)(+2)       | 43.7  | 51.7  | 655.3581 | 695.4542 | 22.4 |
| QLEDELVSLQK(+2)               | 43.7  | 51.7  | 651.351  | 931.5095 | 22.4 |
| QLEDELVSLQK(+2)               | 43.7  | 51.7  | 651.351  | 816.4825 | 22.4 |
| QLEDELVSLQK(+2)               | 43.7  | 51.7  | 651.351  | 687.44   | 22.4 |
| QLELNER(+2)                   | 31.79 | 39.79 | 451.2405 | 773.4152 | 16.4 |
| QLELNER(+2)                   | 31.79 | 39.79 | 451.2405 | 660.3311 | 16.4 |
| QLELNER(+2)                   | 31.79 | 39.79 | 451.2405 | 531.2885 | 16.4 |
| QLVEDLDR(+2)                  | 36.06 | 44.06 | 494.2589 | 746.3679 | 17.7 |
| QLVEDLDR(+2)                  | 36.06 | 44.06 | 494.2589 | 647.2995 | 17.7 |
| QLVEDLDR(+2)                  | 36.06 | 44.06 | 494.2589 | 518.2569 | 17.7 |
| SDQDYILK(+2)                  | 35.93 | 43.93 | 491.248  | 779.4298 | 17.6 |
| SDQDYILK(+2)                  | 35.93 | 43.93 | 491.248  | 651.3712 | 17.6 |
| SDQDYILK(+2)                  | 35.93 | 43.93 | 491.248  | 536.3443 | 17.6 |
| SEILYIR(+2)                   | 40.66 | 48.66 | 447.2582 | 677.4345 | 16.3 |
| SEILYIR(+2)                   | 40.66 | 48.66 | 447.2582 | 564.3504 | 16.3 |
| SEILYIR(+2)                   | 40.66 | 48.66 | 447.2582 | 451.2663 | 16.3 |
| SFLYSAAK(+2)                  | 36.83 | 44.83 | 443.7371 | 652.3665 | 16.2 |
| SFLYSAAK(+2)                  | 36.83 | 44.83 | 443.7371 | 539.2824 | 16.2 |
| SFLYSAAK(+2)                  | 36.83 | 44.83 | 443.7371 | 376.2191 | 16.2 |
| SIDDLEDELYAQK (heavy)(+2)     | 46.42 | 54.42 | 773.8718 | 1116.566 | 26   |
| SIDDLEDELYAQK (heavy)(+2)     | 46.42 | 54.42 | 773.8718 | 1003.482 | 26   |
| SIDDLEDELYAQK (heavy)(+2)     | 46.42 | 54.42 | 773.8718 | 874.4396 | 26   |
| SIDDLEDELYAQK(+2)             | 46.42 | 54.42 | 769.8647 | 1108.552 | 26   |
| SIDDLEDELYAQK(+2)             | 46.42 | 54.42 | 769.8647 | 995.468  | 26   |
| SIDDLEDELYAQK(+2)             | 46.42 | 54.42 | 769.8647 | 866.4254 | 26   |
| SIDWDLLEK(+2)                 | 49.44 | 57.44 | 559.79   | 918.4567 | 19.7 |
| SIDWDLLEK(+2)                 | 49.44 | 57.44 | 559.79   | 803.4298 | 19.7 |
| SIDWDLLEK(+2)                 | 49.44 | 57.44 | 559.79   | 617.3505 | 19.7 |
| SSLYC[+57.0]SDIPSIHPISEPK(+3) | 43.84 | 51.84 | 677.3348 | 1104.605 | 28   |
| SSLYC[+57.0]SDIPSIHPISEPK(+3) | 43.84 | 51.84 | 677.3348 | 1007.552 | 28   |
| SSLYC[+57.0]SDIPSIHPISEPK(+3) | 43.84 | 51.84 | 677.3348 | 807.4359 | 28   |
| SSLYC[+57.0]SDIPSIHPISEPK(+3) | 43.84 | 51.84 | 677.3348 | 670.377  | 28   |
| SVILLGR(+2)                   | 40.05 | 48.05 | 379.2502 | 571.3926 | 14.3 |
| SVILLGR(+2)                   | 40.05 | 48.05 | 379.2502 | 458.3085 | 14.3 |
| SVILLGR(+2)                   | 40.05 | 48.05 | 379.2502 | 345.2245 | 14.3 |
| TDLHAFENLEIIR(+3)             | 48.76 | 56.76 | 524.279  | 757.4567 | 22.2 |
| TDLHAFENLEIIR(+3)             | 48.76 | 56.76 | 524.279  | 643.4137 | 22.2 |
| TDLHAFENLEIIR(+3)             | 48.76 | 56.76 | 524.279  | 530.3297 | 22.2 |
| TFFVHTPNR(+2)                 | 35.5  | 43.5  | 559.7907 | 870.4581 | 19.7 |
| TFFVHTPNR(+2)                 | 35.5  | 43.5  | 559.7907 | 723.3896 | 19.7 |
| TFFVHTPNR(+2)                 | 35.5  | 43.5  | 559.7907 | 624.3212 | 19.7 |

|                             |       |       |          |          |      |
|-----------------------------|-------|-------|----------|----------|------|
| TFFVHTPNR(+2)               | 35.5  | 43.5  | 559.7907 | 386.2146 | 19.7 |
| TFFVHTPNR(+3)               | 35.5  | 43.5  | 373.5296 | 624.3212 | 16.5 |
| TFFVHTPNR(+3)               | 35.5  | 43.5  | 373.5296 | 487.2623 | 16.5 |
| TFFVHTPNR(+3)               | 35.5  | 43.5  | 373.5296 | 386.2146 | 16.5 |
| TIIQNPTDQQK(+2)             | 32.31 | 40.31 | 643.341  | 958.4588 | 22.2 |
| TIIQNPTDQQK(+2)             | 32.31 | 40.31 | 643.341  | 830.4003 | 22.2 |
| TIIQNPTDQQK(+2)             | 32.31 | 40.31 | 643.341  | 716.3573 | 22.2 |
| TIQEVAGYVLIALNTVER(+2)      | 67.23 | 75.23 | 995.0544 | 1290.742 | 32.8 |
| TIQEVAGYVLIALNTVER(+2)      | 67.23 | 75.23 | 995.0544 | 1127.678 | 32.8 |
| TIQEVAGYVLIALNTVER(+2)      | 67.23 | 75.23 | 995.0544 | 1028.61  | 32.8 |
| TPAQFDADEL (heavy)(+2)      | 38.98 | 46.98 | 636.8084 | 1171.562 | 21.9 |
| TPAQFDADEL (heavy)(+2)      | 38.98 | 46.98 | 636.8084 | 1003.472 | 21.9 |
| TPAQFDADEL (heavy)(+2)      | 38.98 | 46.98 | 636.8084 | 875.4133 | 21.9 |
| TPAQFDADEL (heavy)(+2)      | 38.98 | 46.98 | 636.8084 | 728.3449 | 21.9 |
| TPAQFDADEL(+2)              | 38.98 | 46.98 | 631.8042 | 1161.553 | 21.9 |
| TPAQFDADEL(+2)              | 38.98 | 46.98 | 631.8042 | 993.4636 | 21.9 |
| TPAQFDADEL(+2)              | 38.98 | 46.98 | 631.8042 | 865.405  | 21.9 |
| TPAQFDADEL(+2)              | 38.98 | 46.98 | 631.8042 | 718.3366 | 21.9 |
| TQTESSTPPGIPGGSR(+2)        | 33.29 | 41.29 | 786.3866 | 1025.537 | 26.5 |
| TQTESSTPPGIPGGSR(+2)        | 33.29 | 41.29 | 786.3866 | 938.5054 | 26.5 |
| TQTESSTPPGIPGGSR(+2)        | 33.29 | 41.29 | 786.3866 | 837.4577 | 26.5 |
| TQTESSTPPGIPGGSR(+2)        | 33.29 | 41.29 | 786.3866 | 740.405  | 26.5 |
| TQTESSTPPGIPGGSR(+2)        | 33.29 | 41.29 | 786.3866 | 473.2467 | 26.5 |
| TVISNLRPFTLYR(+3)           | 47.25 | 55.25 | 527.3033 | 796.4352 | 22.3 |
| TVISNLRPFTLYR(+3)           | 47.25 | 55.25 | 527.3033 | 699.3824 | 22.3 |
| TVISNLRPFTLYR(+3)           | 47.25 | 55.25 | 527.3033 | 552.314  | 22.3 |
| TYSKPFHPK(+2)               | 23.83 | 31.83 | 552.7955 | 840.4726 | 19.5 |
| TYSKPFHPK(+2)               | 23.83 | 31.83 | 552.7955 | 753.4406 | 19.5 |
| TYSKPFHPK(+2)               | 23.83 | 31.83 | 552.7955 | 625.3457 | 19.5 |
| VAAQNSAEVVR(+2)             | 28.47 | 36.47 | 572.3095 | 774.4104 | 20.1 |
| VAAQNSAEVVR(+2)             | 28.47 | 36.47 | 572.3095 | 660.3675 | 20.1 |
| VAAQNSAEVVR(+2)             | 28.47 | 36.47 | 572.3095 | 573.3355 | 20.1 |
| VEQVVKPPQNK(+2)             | 27.89 | 35.89 | 633.3642 | 909.5516 | 21.9 |
| VEQVVKPPQNK(+2)             | 27.89 | 35.89 | 633.3642 | 810.4832 | 21.9 |
| VEQVVKPPQNK(+2)             | 27.89 | 35.89 | 633.3642 | 711.4148 | 21.9 |
| VEQVVKPPQNK(+2)             | 27.89 | 35.89 | 633.3642 | 583.3198 | 21.9 |
| VEQVVKPPQNK(+2)             | 27.89 | 35.89 | 633.3642 | 486.2671 | 21.9 |
| VEQVVKPPQNK(+3)             | 27.89 | 35.89 | 422.5786 | 711.4148 | 18.3 |
| VEQVVKPPQNK(+3)             | 27.89 | 35.89 | 422.5786 | 583.3198 | 18.3 |
| VEQVVKPPQNK(+3)             | 27.89 | 35.89 | 422.5786 | 486.2671 | 18.3 |
| VIESGPHC[+57.0]ANTEIIVK(+3) | 35.55 | 43.55 | 589.6417 | 1281.662 | 24.7 |
| VIESGPHC[+57.0]ANTEIIVK(+3) | 35.55 | 43.55 | 589.6417 | 816.4825 | 24.7 |
| VIESGPHC[+57.0]ANTEIIVK(+3) | 35.55 | 43.55 | 589.6417 | 702.4396 | 24.7 |

|                             |       |       |          |          |      |
|-----------------------------|-------|-------|----------|----------|------|
| VIESGPHC[+57.0]ANTEIIVK(+3) | 35.55 | 43.55 | 589.6417 | 601.3919 | 24.7 |
| VLDSGAPIK(+2)               | 32.8  | 40.8  | 450.2635 | 687.3672 | 16.4 |
| VLDSGAPIK(+2)               | 32.8  | 40.8  | 450.2635 | 572.3402 | 16.4 |
| VLDSGAPIK(+2)               | 32.8  | 40.8  | 450.2635 | 485.3082 | 16.4 |
| VLDSGAPIK(+2)               | 32.8  | 40.8  | 450.2635 | 357.2496 | 16.4 |
| VLISTDVWAR(+2)              | 45.91 | 53.91 | 580.3271 | 834.4104 | 20.3 |
| VLISTDVWAR(+2)              | 45.91 | 53.91 | 580.3271 | 747.3784 | 20.3 |
| VLISTDVWAR(+2)              | 45.91 | 53.91 | 580.3271 | 646.3307 | 20.3 |
| VLQGLPR(+2)                 | 34.94 | 42.94 | 391.7478 | 683.4199 | 14.7 |
| VLQGLPR(+2)                 | 34.94 | 42.94 | 391.7478 | 570.3358 | 14.7 |
| VLQGLPR(+2)                 | 34.94 | 42.94 | 391.7478 | 442.2772 | 14.7 |
| VLSPESK(+2)                 | 24.49 | 32.49 | 380.216  | 660.3563 | 14.3 |
| VLSPESK(+2)                 | 24.49 | 32.49 | 380.216  | 547.2722 | 14.3 |
| VLSPESK(+2)                 | 24.49 | 32.49 | 380.216  | 460.2402 | 14.3 |
| VLSSIEQK (heavy)(+2)        | 29.81 | 37.81 | 456.268  | 699.3763 | 16.5 |
| VLSSIEQK (heavy)(+2)        | 29.81 | 37.81 | 456.268  | 612.3443 | 16.5 |
| VLSSIEQK (heavy)(+2)        | 29.81 | 37.81 | 456.268  | 525.3122 | 16.5 |
| VLSSIEQK(+2)                | 29.81 | 37.81 | 452.2609 | 691.3621 | 16.5 |
| VLSSIEQK(+2)                | 29.81 | 37.81 | 452.2609 | 604.3301 | 16.5 |
| VLSSIEQK(+2)                | 29.81 | 37.81 | 452.2609 | 517.298  | 16.5 |
| VTTHPLAK(+2)                | 22.85 | 30.85 | 433.7584 | 767.441  | 15.9 |
| VTTHPLAK(+2)                | 22.85 | 30.85 | 433.7584 | 666.3933 | 15.9 |
| VTTHPLAK(+2)                | 22.85 | 30.85 | 433.7584 | 565.3457 | 15.9 |
| VTTHPLAK(+2)                | 22.85 | 30.85 | 433.7584 | 428.2867 | 15.9 |
| VTVAGLAGK (heavy)(+2)       | 34.47 | 42.47 | 412.26   | 623.3966 | 15.2 |
| VTVAGLAGK (heavy)(+2)       | 34.47 | 42.47 | 412.26   | 524.3282 | 15.2 |
| VTVAGLAGK (heavy)(+2)       | 34.47 | 42.47 | 412.26   | 453.2911 | 15.2 |
| VTVAGLAGK(+2)               | 34.47 | 42.47 | 408.2529 | 615.3824 | 15.2 |
| VTVAGLAGK(+2)               | 34.47 | 42.47 | 408.2529 | 516.314  | 15.2 |
| VTVAGLAGK(+2)               | 34.47 | 42.47 | 408.2529 | 445.2769 | 15.2 |
| WVQDSMK(+2)                 | 31.72 | 39.72 | 447.2129 | 707.3393 | 16.3 |
| WVQDSMK(+2)                 | 31.72 | 39.72 | 447.2129 | 608.2708 | 16.3 |
| WVQDSMK(+2)                 | 31.72 | 39.72 | 447.2129 | 480.2123 | 16.3 |
| YADGTIDIEEV TENPK(+2)       | 43.68 | 51.68 | 897.4256 | 1173.563 | 29.8 |
| YADGTIDIEEV TENPK(+2)       | 43.68 | 51.68 | 897.4256 | 1058.536 | 29.8 |
| YADGTIDIEEV TENPK(+2)       | 43.68 | 51.68 | 897.4256 | 945.4524 | 29.8 |
| YGSQVEDQR(+2)               | 25.92 | 33.92 | 541.2491 | 774.3741 | 19.1 |
| YGSQVEDQR(+2)               | 25.92 | 33.92 | 541.2491 | 646.3155 | 19.1 |
| YGSQVEDQR(+2)               | 25.92 | 33.92 | 541.2491 | 547.2471 | 19.1 |
| YIEHLEAVTC[+57.0]K(+2)      | 35.15 | 43.15 | 681.8397 | 957.4822 | 23.4 |
| YIEHLEAVTC[+57.0]K(+2)      | 35.15 | 43.15 | 681.8397 | 820.4233 | 23.4 |
| YIEHLEAVTC[+57.0]K(+2)      | 35.15 | 43.15 | 681.8397 | 707.3393 | 23.4 |
| YIEHLEAVTC[+57.0]K(+3)      | 35.15 | 43.15 | 454.8956 | 707.3393 | 19.6 |

|                        |       |       |          |          |      |
|------------------------|-------|-------|----------|----------|------|
| YIEHLEAVTC[+57.0]K(+3) | 35.15 | 43.15 | 454.8956 | 578.2967 | 19.6 |
| YIEHLEAVTC[+57.0]K(+3) | 35.15 | 43.15 | 454.8956 | 507.2595 | 19.6 |
| YLAEVATGDDK(+2)        | 34.08 | 42.08 | 591.2879 | 834.384  | 20.6 |
| YLAEVATGDDK(+2)        | 34.08 | 42.08 | 591.2879 | 705.3414 | 20.6 |
| YLAEVATGDDK(+2)        | 34.08 | 42.08 | 591.2879 | 606.2729 | 20.6 |
| YLAEVATGEK(+2)         | 33.78 | 41.78 | 540.7822 | 804.4098 | 19.1 |
| YLAEVATGEK(+2)         | 33.78 | 41.78 | 540.7822 | 733.3727 | 19.1 |
| YLAEVATGEK(+2)         | 33.78 | 41.78 | 540.7822 | 604.3301 | 19.1 |
| YQEALAK(+2)            | 27.25 | 35.25 | 411.7214 | 659.3723 | 15.3 |
| YQEALAK(+2)            | 27.25 | 35.25 | 411.7214 | 531.3137 | 15.3 |
| YQEALAK(+2)            | 27.25 | 35.25 | 411.7214 | 402.2711 | 15.3 |
| YQEALAK(+2)            | 27.25 | 35.25 | 411.7214 | 331.234  | 15.3 |
| YYIHDHFIPIEK(+3)       | 40.13 | 48.13 | 525.6049 | 883.5036 | 22.3 |
| YYIHDHFIPIEK(+3)       | 40.13 | 48.13 | 525.6049 | 746.4447 | 22.3 |
| YYIHDHFIPIEK(+3)       | 40.13 | 48.13 | 525.6049 | 599.3763 | 22.3 |
| YYIHDHFIPIEK(+3)       | 40.13 | 48.13 | 525.6049 | 486.2922 | 22.3 |



## Database Links

dbGAP: [http://www.ncbi.nlm.nih.gov/projects/gap/cgi-bin/dataset.cgi?study\\_id=phs000007.v27.p10&pht=1415](http://www.ncbi.nlm.nih.gov/projects/gap/cgi-bin/dataset.cgi?study_id=phs000007.v27.p10&pht=1415)

MassIVE: <https://massive.ucsd.edu/ProteoSAFe/static/massive.jsp>

Panorama Public:

[https://panoramaweb.org/labkey/project/Carr/Plasma\\_TSQQuantiva\\_AptamerMRM/begin.view](https://panoramaweb.org/labkey/project/Carr/Plasma_TSQQuantiva_AptamerMRM/begin.view)
